# Supplementary material for: Effect of Different Feeds on the Fungi Microbiome of Suffolk Crossed with Tibetan Sheep
Source: MDPI journal article supplement (doi:10.3390/life13112210), 2023-11-14
Supplement: s1 [file s1]

**Table S1.** Nutritional ingredient information for the feeds used in the current study.

| Feed Ingredient/Value   | Concentrated Feed #1 (%) | Concentrated Feed #2 (%) | Concentrated Feed #3 (%) |
|-------------------------|--------------------------|--------------------------|--------------------------|
| Corn                    | 35                       | 45                       | 50                       |
| Wheat bran              | 23.5                     | 11.8                     | 5.9                      |
| Soybean oil             | 0                        | 2.5                      | 3.8                      |
| Bean pulp               | 10                       | 14.3                     | 16.2                     |
| Alfalfa                 | 20                       | 17.4                     | 16.3                     |
| Highland barley straw   | 10.5                     | 8                        | 6.8                      |
| Premix                  | 0.5                      | 0.5                      | 0.5                      |
| Salt                    | 0.5                      | 0.5                      | 0.5                      |
| Total                   | 100                      | 100                      | 100                      |
| Water                   | 6.50                     | 6.50                     | 7.90                     |
| Crude ash               | 13.30                    | 13.20                    | 12.40                    |
| Crude protein           | 9.42                     | 8.62                     | 8.87                     |
| Crude fat               | 35.00                    | 33.00                    | 40.00                    |
| Carbohydrate            | 35.78                    | 38.68                    | 30.83                    |
| Crude fiber             | 15.90                    | 15.10                    | 14.70                    |
| Acid detergent lignin   | 5.50                     | 4.80                     | 4.80                     |
| Neutral detergent fiber | 46.50                    | 41.40                    | 44.20                    |
| Acid detergent fiber    | 25.60                    | 21.50                    | 21.50                    |
| Calcium                 | 1.84                     | 2.02                     | 2.02                     |
| Phosphorus              | 0.27                     | 0.24                     | 0.24                     |

**Table S2.** Detailed PCR information for this study.

| Reagents  |                                                  | Volume (μL) |
|-----------|--------------------------------------------------|-------------|
| Mixture   | 2.5 mM dNTPs (TransGen Biotech, China)           | 2           |
|           | 5xFastPfu buffer (TransGen Biotech, China)       | 4           |
|           | FastPfu DNA Polymerase (TransGen Biotech, China) | 0.4         |
|           | DNA template product                             | 1           |
|           | ITS1 F                                           | 0.4         |
|           | ITS1 R                                           | 0.4         |
|           | Distilled water                                  | 11.8        |
|           | Total                                            | 20          |
| Reaction  | Steps                                            | Time        |
| 27 cycles | Initial denaturation (95 °C)                     | 3 min       |
|           | Denaturation (95 °C)                             | 30 s        |
|           | Annealing (55 °C)                                | 30 s        |
|           | Extension (72 °C)                                | 30 s        |
|           | Extension (72 °C)                                | 10 min      |

**Table S3.** Sequencing data generated in the current study.

| Sample ID | Input   | Filtered | Percentage of<br>Input that Passed<br>Filter | Denoised | Merged  | Percentage of<br>Input Merged | Non-Chimeric | Percentage of<br>Non-Chimeric<br>Input |
|-----------|---------|----------|----------------------------------------------|----------|---------|-------------------------------|--------------|----------------------------------------|
| AZ1       | 106,985 | 83,418   | 77.97                                        | 82,875   | 68,916  | 64.42                         | 67,983       | 63.54                                  |
| AZ2       | 127,675 | 107,567  | 84.25                                        | 106,744  | 89,827  | 70.36                         | 89,825       | 70.35                                  |
| AZ3       | 73,479  | 61,573   | 83.80                                        | 61,042   | 47,863  | 65.14                         | 47,826       | 65.09                                  |
| AZ4       | 133,556 | 112,144  | 83.97                                        | 111,183  | 82,943  | 62.10                         | 82,891       | 62.06                                  |
| AZ5       | 132,711 | 115,063  | 86.70                                        | 112,384  | 107,648 | 81.11                         | 106,536      | 80.28                                  |

|     |         |         |       |         |         |       |         |       |
|-----|---------|---------|-------|---------|---------|-------|---------|-------|
| BZ1 | 114,309 | 96,159  | 84.12 | 94,817  | 76,879  | 67.26 | 76,512  | 66.93 |
| BZ2 | 135,563 | 113,999 | 84.09 | 112,481 | 100,328 | 74.01 | 99,102  | 73.10 |
| BZ3 | 105,663 | 89,654  | 84.85 | 88,280  | 76,650  | 72.54 | 76,401  | 72.31 |
| BZ4 | 125,450 | 104,920 | 83.63 | 103,398 | 88,642  | 70.66 | 88,493  | 70.54 |
| BZ5 | 137,999 | 118,030 | 85.53 | 117,097 | 107,519 | 77.91 | 106,397 | 77.10 |
| CZ1 | 75,827  | 64,179  | 84.64 | 63,408  | 61,571  | 81.20 | 61,103  | 80.58 |
| CZ2 | 83,885  | 71,770  | 85.56 | 70,870  | 68,007  | 81.07 | 67,007  | 79.88 |
| CZ3 | 50,826  | 41,264  | 81.19 | 40,790  | 37,454  | 73.69 | 37,318  | 73.42 |
| CZ4 | 82,031  | 65,256  | 79.55 | 64,465  | 63,167  | 77.00 | 62,851  | 76.62 |
| CZ5 | 74,058  | 61,685  | 83.29 | 60,875  | 56,893  | 76.82 | 56,723  | 76.59 |
| DZ1 | 160,885 | 142,520 | 88.59 | 141,197 | 130,430 | 81.07 | 128,799 | 80.06 |
| DZ2 | 84,462  | 74,725  | 88.47 | 73,660  | 72,171  | 85.45 | 71,818  | 85.03 |
| DZ3 | 144,371 | 122,026 | 84.52 | 120,533 | 117,150 | 81.15 | 109,909 | 76.13 |
| DZ4 | 158,962 | 131,807 | 82.92 | 130,518 | 125,890 | 79.20 | 122,955 | 77.35 |
| DZ5 | 101,303 | 82,166  | 81.11 | 81,079  | 74,626  | 73.67 | 72,686  | 71.75 |
| EZ1 | 161,119 | 137,087 | 85.08 | 134,215 | 129,788 | 80.55 | 127,008 | 78.83 |
| EZ2 | 160,324 | 123,694 | 77.15 | 122,910 | 120,506 | 75.16 | 119,838 | 74.75 |
| EZ3 | 134,226 | 115,604 | 86.13 | 114,534 | 106,322 | 79.21 | 104,428 | 77.80 |
| EZ4 | 62,310  | 53,843  | 86.41 | 52,937  | 51,369  | 82.44 | 51,047  | 81.92 |
| EZ5 | 53,482  | 43,086  | 80.56 | 41,941  | 40,362  | 75.47 | 38,499  | 71.98 |

**Table S4.** Statistical analysis of the Alpha diversity index in the ST sheep groups.

| Sample | chao1 | faith_pd    | observed_features | shannon_entropy | Simpson     |
|--------|-------|-------------|-------------------|-----------------|-------------|
| AZ1    | 135   | 30.30201837 | 135               | 4.184765421     | 0.903904095 |
| AZ2    | 198   | 39.94587916 | 198               | 4.545931900     | 0.932746861 |
| AZ3    | 105   | 21.13236541 | 105               | 4.261718745     | 0.925120176 |
| AZ4    | 196   | 48.12695369 | 196               | 4.525674383     | 0.936532637 |
| AZ5    | 343   | 78.51589695 | 343               | 3.950515182     | 0.755557375 |
| BZ1    | 314   | 60.95170897 | 314               | 5.002819171     | 0.941507561 |
| BZ2    | 255   | 61.5090516  | 255               | 4.564360126     | 0.914389386 |
| BZ3    | 196   | 48.77441271 | 196               | 4.366933470     | 0.908789477 |
| BZ4    | 190   | 43.02040271 | 190               | 3.563486979     | 0.802307536 |
| BZ5    | 210   | 45.13994307 | 210               | 4.006353752     | 0.858627985 |
| CZ1    | 277   | 48.81506241 | 277               | 5.561021794     | 0.931097328 |
| CZ2    | 384   | 47.51557581 | 384               | 7.158246222     | 0.98635995  |
| CZ3    | 154   | 29.86679489 | 154               | 4.048319309     | 0.876663685 |
| CZ4    | 246   | 47.90667354 | 246               | 5.313414881     | 0.943519086 |
| CZ5    | 207   | 47.42970281 | 207               | 4.996391213     | 0.930689045 |
| DZ1    | 168   | 45.74432897 | 168               | 1.882440470     | 0.452769305 |
| DZ2    | 189   | 50.74399507 | 189               | 1.898805092     | 0.433119129 |
| DZ3    | 432   | 61.87250318 | 432               | 7.173194506     | 0.988832848 |
| DZ4    | 263   | 47.58961621 | 263               | 2.966428793     | 0.610751670 |
| DZ5    | 105   | 27.80599644 | 105               | 5.102872495     | 0.962086167 |
| EZ1    | 495   | 84.06189545 | 495               | 4.643088381     | 0.751595398 |
| EZ2    | 210   | 33.28028689 | 210               | 5.712930128     | 0.957193016 |
| EZ3    | 152   | 35.77818851 | 152               | 2.834970958     | 0.668057691 |
| EZ4    | 294   | 45.17737199 | 294               | 5.407603476     | 0.932955730 |
| EZ5    | 388   | 60.16791782 | 388               | 6.630918580     | 0.978107556 |

**Table S5.** Comparison of fungi microbiota function of enzyme abundances in ST sheep in different feeding groups.

| Feature                                         | Group | Mean     | SE       | Duncan significance |
|-------------------------------------------------|-------|----------|----------|---------------------|
| O55528, L_SENDO                                 | AZ    | 0.868785 | 0.101617 | a                   |
| O55528, L_SENDO                                 | BZ    | 0.960813 | 0.033028 | a                   |
| O55528, L_SENDO                                 | CZ    | -0.36937 | 0.171259 | b                   |
| O55528, L_SENDO                                 | DZ    | -0.78839 | 0.112974 | b                   |
| O55528, L_SENDO                                 | EZ    | -0.67183 | 0.205244 | b                   |
| Q06996, L_SENDF                                 | AZ    | -0.90319 | 0.140407 | b                   |
| Q06996, L_SENDF                                 | BZ    | -0.87225 | 0.17922  | b                   |
| Q06996, L_SENDF                                 | CZ    | 0.601327 | 0.12491  | a                   |
| Q06996, L_SENDF                                 | DZ    | 0.692534 | 0.071604 | a                   |
| Q06996, L_SENDF                                 | EZ    | 0.48158  | 0.186954 | a                   |
| (+)-neomenthol dehydrogenase                    | AZ    | -0.9386  | 0.116555 | b                   |
| (+)-neomenthol dehydrogenase                    | BZ    | -0.93074 | 0.165107 | b                   |
| (+)-neomenthol dehydrogenase                    | CZ    | 0.613474 | 0.076258 | a                   |
| (+)-neomenthol dehydrogenase                    | DZ    | 0.493999 | 0.06809  | a                   |
| (+)-neomenthol dehydrogenase                    | EZ    | 0.761863 | 0.203224 | a                   |
| (decarboxylating)                               | AZ    | -0.82661 | 0.095036 | b                   |
| (decarboxylating)                               | BZ    | -0.81694 | 0.069423 | b                   |
| (decarboxylating)                               | CZ    | 0.359886 | 0.170183 | a                   |
| (decarboxylating)                               | DZ    | 0.499311 | 0.108662 | a                   |
| (decarboxylating)                               | EZ    | 0.784344 | 0.261045 | a                   |
| (R,R)-butanediol dehydrogenase                  | AZ    | -0.94789 | 0.172882 | b                   |
| (R,R)-butanediol dehydrogenase                  | BZ    | -0.80561 | 0.10263  | b                   |
| (R,R)-butanediol dehydrogenase                  | CZ    | 0.480497 | 0.12514  | a                   |
| (R,R)-butanediol dehydrogenase                  | DZ    | 0.802509 | 0.044393 | a                   |
| (R,R)-butanediol dehydrogenase                  | EZ    | 0.470498 | 0.223068 | a                   |
| (S)-2-haloacid dehalogenase                     | AZ    | -0.90263 | 0.091082 | b                   |
| (S)-2-haloacid dehalogenase                     | BZ    | -1.07374 | 0.099481 | b                   |
| (S)-2-haloacid dehalogenase                     | CZ    | 0.707393 | 0.113941 | a                   |
| (S)-2-haloacid dehalogenase                     | DZ    | 0.674483 | 0.092258 | a                   |
| (S)-2-haloacid dehalogenase                     | EZ    | 0.594485 | 0.191034 | a                   |
| [Acyl-carrier-protein] S-malonyltransferase     | AZ    | 0.798708 | 0.081445 | a                   |
| [Acyl-carrier-protein] S-malonyltransferase     | BZ    | 0.870202 | 0.026205 | a                   |
| [Acyl-carrier-protein] S-malonyltransferase     | CZ    | -0.62356 | 0.279293 | b                   |
| [Acyl-carrier-protein] S-malonyltransferase     | DZ    | -0.57455 | 0.100397 | b                   |
| [Acyl-carrier-protein] S-malonyltransferase     | EZ    | -0.47079 | 0.166754 | b                   |
| [Formate-C-acetyltransferase]-activating enzyme | AZ    | -0.92001 | 0.089257 | b                   |
| [Formate-C-acetyltransferase]-activating enzyme | BZ    | -1.07806 | 0.098461 | b                   |
| [Formate-C-acetyltransferase]-activating enzyme | CZ    | 0.691931 | 0.100971 | a                   |
| [Formate-C-acetyltransferase]-activating enzyme | DZ    | 0.653679 | 0.079761 | a                   |
| [Formate-C-acetyltransferase]-activating enzyme | EZ    | 0.652455 | 0.196882 | a                   |

|                                                                |    |          |          |    |
|----------------------------------------------------------------|----|----------|----------|----|
| [Pyruvate dehydrogenase (acetyl-transferring)]-phosphatase     | AZ | -0.94044 | 0.132781 | b  |
| [Pyruvate dehydrogenase (acetyl-transferring)]-phosphatase     | BZ | -0.99541 | 0.114632 | b  |
| [Pyruvate dehydrogenase (acetyl-transferring)]-phosphatase     | CZ | 0.721605 | 0.123914 | a  |
| [Pyruvate dehydrogenase (acetyl-transferring)]-phosphatase     | DZ | 0.745665 | 0.054465 | a  |
| [Pyruvate dehydrogenase (acetyl-transferring)]-phosphatase     | EZ | 0.468576 | 0.179804 | a  |
| [Ribulose-bisphosphate carboxylase]-lysine N-methyltransferase | AZ | -0.99421 | 0.147532 | b  |
| [Ribulose-bisphosphate carboxylase]-lysine N-methyltransferase | BZ | -0.86166 | 0.077661 | b  |
| [Ribulose-bisphosphate carboxylase]-lysine N-methyltransferase | CZ | 0.562258 | 0.111959 | a  |
| [Ribulose-bisphosphate carboxylase]-lysine N-methyltransferase | DZ | 0.958879 | 0.040416 | a  |
| [Ribulose-bisphosphate carboxylase]-lysine N-methyltransferase | EZ | 0.334723 | 0.210021 | a  |
| 1-acylglycerol-3-phosphate O-acyltransferase                   | AZ | 0.849033 | 0.113254 | a  |
| 1-acylglycerol-3-phosphate O-acyltransferase                   | BZ | 0.952843 | 0.036724 | a  |
| 1-acylglycerol-3-phosphate O-acyltransferase                   | CZ | -0.4421  | 0.182474 | b  |
| 1-acylglycerol-3-phosphate O-acyltransferase                   | DZ | -0.80786 | 0.128023 | b  |
| 1-acylglycerol-3-phosphate O-acyltransferase                   | EZ | -0.55191 | 0.192523 | b  |
| 1-alkyl-2-acetylgllycerophosphocholine esterase                | AZ | 0.882539 | 0.074319 | a  |
| 1-alkyl-2-acetylgllycerophosphocholine esterase                | BZ | 0.964239 | 0.021636 | a  |
| 1-alkyl-2-acetylgllycerophosphocholine esterase                | CZ | -0.40076 | 0.173143 | b  |
| 1-alkyl-2-acetylgllycerophosphocholine esterase                | DZ | -0.7695  | 0.137679 | b  |
| 1-alkyl-2-acetylgllycerophosphocholine esterase                | EZ | -0.67652 | 0.197793 | b  |
| 1-aminocyclopropane-1-carboxylate synthase                     | AZ | 0.760842 | 0.104223 | ab |
| 1-aminocyclopropane-1-carboxylate synthase                     | BZ | 0.932409 | 0.036392 | a  |
| 1-aminocyclopropane-1-carboxylate synthase                     | CZ | -0.0496  | 0.122862 | bc |
| 1-aminocyclopropane-1-carboxylate synthase                     | DZ | -1.08175 | 0.183892 | d  |
| 1-aminocyclopropane-1-carboxylate synthase                     | EZ | -0.56191 | 0.17908  | cd |
| 1-phosphatidylinositol-4-phosphate 5-kinase                    | AZ | 0.896964 | 0.068937 | a  |
| 1-phosphatidylinositol-4-phosphate 5-kinase                    | BZ | 0.961304 | 0.020695 | a  |
| 1-phosphatidylinositol-4-phosphate 5-kinase                    | CZ | -0.36173 | 0.173177 | b  |
| 1-phosphatidylinositol-4-phosphate 5-kinase                    | DZ | -0.7467  | 0.117534 | b  |
| 1-phosphatidylinositol-4-phosphate 5-kinase                    | EZ | -0.74983 | 0.205059 | b  |
| 1,3-beta-glucan synthase                                       | AZ | -0.94024 | 0.160129 | b  |
| 1,3-beta-glucan synthase                                       | BZ | -0.88153 | 0.105356 | b  |
| 1,3-beta-glucan synthase                                       | CZ | 0.506743 | 0.09901  | a  |
| 1,3-beta-glucan synthase                                       | DZ | 0.847554 | 0.050612 | a  |
| 1,3-beta-glucan synthase                                       | EZ | 0.467474 | 0.219439 | a  |
| 1,4-alpha-glucan branching enzyme                              | AZ | 0.866802 | 0.103111 | a  |
| 1,4-alpha-glucan branching enzyme                              | BZ | 0.962972 | 0.033353 | a  |
| 1,4-alpha-glucan branching enzyme                              | CZ | -0.38555 | 0.173323 | b  |
| 1,4-alpha-glucan branching enzyme                              | DZ | -0.76463 | 0.109365 | b  |
| 1,4-alpha-glucan branching enzyme                              | EZ | -0.67959 | 0.206309 | b  |
| 15-hydroxyprostaglandin dehydrogenase (NAD(+))                 | AZ | -0.80474 | 0.142095 | b  |
| 15-hydroxyprostaglandin dehydrogenase (NAD(+))                 | BZ | -0.94476 | 0.058246 | b  |
| 15-hydroxyprostaglandin dehydrogenase (NAD(+))                 | CZ | 0.514036 | 0.147743 | a  |
| 15-hydroxyprostaglandin dehydrogenase (NAD(+))                 | DZ | 0.562261 | 0.136494 | a  |

|                                                                   |    |          |          |     |
|-------------------------------------------------------------------|----|----------|----------|-----|
| 15-hydroxyprostaglandin dehydrogenase (NAD(+))                    | EZ | 0.673202 | 0.217418 | a   |
| 2-acylglycerol O-acyltransferase                                  | AZ | -0.89015 | 0.116878 | b   |
| 2-acylglycerol O-acyltransferase                                  | BZ | -0.97146 | 0.155143 | b   |
| 2-acylglycerol O-acyltransferase                                  | CZ | 0.64138  | 0.1246   | a   |
| 2-acylglycerol O-acyltransferase                                  | DZ | 0.692759 | 0.082785 | a   |
| 2-acylglycerol O-acyltransferase                                  | EZ | 0.527478 | 0.186038 | a   |
| 2-amino-4-hydroxy-6-hydroxymethyldihydropteridine diphosphokinase | AZ | -0.924   | 0.136053 | c   |
| 2-amino-4-hydroxy-6-hydroxymethyldihydropteridine diphosphokinase | BZ | -0.45548 | 0.180335 | bc  |
| 2-amino-4-hydroxy-6-hydroxymethyldihydropteridine diphosphokinase | CZ | 0.238126 | 0.184639 | ab  |
| 2-amino-4-hydroxy-6-hydroxymethyldihydropteridine diphosphokinase | DZ | 1.014466 | 0.052674 | a   |
| 2-amino-4-hydroxy-6-hydroxymethyldihydropteridine diphosphokinase | EZ | 0.126879 | 0.209629 | abc |
| 2-aminomuconate deaminase                                         | AZ | -0.90048 | 0.095242 | b   |
| 2-aminomuconate deaminase                                         | BZ | -1.04301 | 0.141592 | b   |
| 2-aminomuconate deaminase                                         | CZ | 0.664868 | 0.10057  | a   |
| 2-aminomuconate deaminase                                         | DZ | 0.611296 | 0.07722  | a   |
| 2-aminomuconate deaminase                                         | EZ | 0.667329 | 0.191867 | a   |
| 2-deoxy-D-gluconate 3-dehydrogenase                               | AZ | -0.9385  | 0.158605 | b   |
| 2-deoxy-D-gluconate 3-dehydrogenase                               | BZ | -0.87207 | 0.100589 | b   |
| 2-deoxy-D-gluconate 3-dehydrogenase                               | CZ | 0.578711 | 0.11192  | a   |
| 2-deoxy-D-gluconate 3-dehydrogenase                               | DZ | 0.773373 | 0.044777 | a   |
| 2-deoxy-D-gluconate 3-dehydrogenase                               | EZ | 0.458483 | 0.225765 | a   |
| 2-methylacyl-CoA dehydrogenase                                    | AZ | -0.87787 | 0.103406 | b   |
| 2-methylacyl-CoA dehydrogenase                                    | BZ | -1.00487 | 0.139632 | b   |
| 2-methylacyl-CoA dehydrogenase                                    | CZ | 0.685816 | 0.133192 | a   |
| 2-methylacyl-CoA dehydrogenase                                    | DZ | 0.708469 | 0.092184 | a   |
| 2-methylacyl-CoA dehydrogenase                                    | EZ | 0.488456 | 0.184412 | a   |
| 2-methylcitrate dehydratase                                       | AZ | -0.90846 | 0.153034 | b   |
| 2-methylcitrate dehydratase                                       | BZ | -0.93471 | 0.097663 | b   |
| 2-methylcitrate dehydratase                                       | CZ | 0.578496 | 0.104604 | a   |
| 2-methylcitrate dehydratase                                       | DZ | 0.810674 | 0.056247 | a   |
| 2-methylcitrate dehydratase                                       | EZ | 0.453998 | 0.219294 | a   |
| 2,3-dihydro-2,3-dihydroxybenzoate dehydrogenase                   | AZ | -1.01316 | 0.179962 | c   |
| 2,3-dihydro-2,3-dihydroxybenzoate dehydrogenase                   | BZ | -0.64245 | 0.117927 | bc  |
| 2,3-dihydro-2,3-dihydroxybenzoate dehydrogenase                   | CZ | 0.476082 | 0.116825 | a   |
| 2,3-dihydro-2,3-dihydroxybenzoate dehydrogenase                   | DZ | 0.815864 | 0.05479  | a   |
| 2,3-dihydro-2,3-dihydroxybenzoate dehydrogenase                   | EZ | 0.363659 | 0.232097 | ab  |
| 2,4-dienoyl-CoA reductase (NADPH)                                 | AZ | 0.845961 | 0.10174  | a   |
| 2,4-dienoyl-CoA reductase (NADPH)                                 | BZ | 0.976177 | 0.035923 | a   |
| 2,4-dienoyl-CoA reductase (NADPH)                                 | CZ | -0.4716  | 0.17971  | b   |
| 2,4-dienoyl-CoA reductase (NADPH)                                 | DZ | -0.76476 | 0.132542 | b   |
| 2,4-dienoyl-CoA reductase (NADPH)                                 | EZ | -0.58577 | 0.193769 | b   |
| 2.7.11.30 and 2.7.12.1                                            | AZ | 0.852737 | 0.096074 | a   |
| 2.7.11.30 and 2.7.12.1                                            | BZ | 0.956348 | 0.031586 | a   |
| 2.7.11.30 and 2.7.12.1                                            | CZ | -0.5068  | 0.177683 | b   |

|                                           |    |          |          |    |
|-------------------------------------------|----|----------|----------|----|
| 2.7.11.30 and 2.7.12.1                    | DZ | -0.63359 | 0.136888 | b  |
| 2.7.11.30 and 2.7.12.1                    | EZ | -0.6687  | 0.20519  | b  |
| 2'-hydroxyisoflavone reductase            | AZ | -0.87367 | 0.121866 | b  |
| 2'-hydroxyisoflavone reductase            | BZ | -0.49316 | 0.20247  | b  |
| 2'-hydroxyisoflavone reductase            | CZ | 0.168614 | 0.188644 | ab |
| 2'-hydroxyisoflavone reductase            | DZ | 0.918442 | 0.070813 | a  |
| 2'-hydroxyisoflavone reductase            | EZ | 0.279781 | 0.213813 | ab |
| 3-carboxy-cis,cis-muconate cycloisomerase | AZ | -0.5086  | 0.176774 | ab |
| 3-carboxy-cis,cis-muconate cycloisomerase | BZ | -1.0104  | 0.153114 | b  |
| 3-carboxy-cis,cis-muconate cycloisomerase | CZ | 0.464457 | 0.161095 | a  |
| 3-carboxy-cis,cis-muconate cycloisomerase | DZ | 0.579774 | 0.110724 | a  |
| 3-carboxy-cis,cis-muconate cycloisomerase | EZ | 0.474772 | 0.210363 | a  |
| 3-dehydroquinate dehydratase              | AZ | -0.95762 | 0.161203 | b  |
| 3-dehydroquinate dehydratase              | BZ | -0.81603 | 0.100756 | b  |
| 3-dehydroquinate dehydratase              | CZ | 0.552326 | 0.101849 | a  |
| 3-dehydroquinate dehydratase              | DZ | 0.815465 | 0.058521 | a  |
| 3-dehydroquinate dehydratase              | EZ | 0.405866 | 0.232761 | a  |
| 3-dehydrosphinganine reductase            | AZ | 0.725484 | 0.084922 | a  |
| 3-dehydrosphinganine reductase            | BZ | 0.856233 | 0.019798 | a  |
| 3-dehydrosphinganine reductase            | CZ | 0.110176 | 0.086461 | ab |
| 3-dehydrosphinganine reductase            | DZ | -0.86398 | 0.199888 | b  |
| 3-dehydrosphinganine reductase            | EZ | -0.82792 | 0.223138 | b  |
| 3-demethylubiquinol 3-O-methyltransferase | AZ | -0.89651 | 0.15924  | b  |
| 3-demethylubiquinol 3-O-methyltransferase | BZ | -0.88362 | 0.099869 | b  |
| 3-demethylubiquinol 3-O-methyltransferase | CZ | 0.483009 | 0.18628  | a  |
| 3-demethylubiquinol 3-O-methyltransferase | DZ | 0.84042  | 0.075369 | a  |
| 3-demethylubiquinol 3-O-methyltransferase | EZ | 0.4567   | 0.166293 | a  |
| 3-hydroxyacyl-CoA dehydrogenase           | AZ | 0.546019 | 0.049276 | a  |
| 3-hydroxyacyl-CoA dehydrogenase           | BZ | 0.20976  | 0.06328  | a  |
| 3-hydroxyacyl-CoA dehydrogenase           | CZ | 0.345269 | 0.222887 | a  |
| 3-hydroxyacyl-CoA dehydrogenase           | DZ | -1.18908 | 0.278514 | b  |
| 3-hydroxyacyl-CoA dehydrogenase           | EZ | 0.088028 | 0.110314 | a  |
| 3-hydroxyanthranilate 3,4-dioxygenase     | AZ | 0.742527 | 0.100591 | a  |
| 3-hydroxyanthranilate 3,4-dioxygenase     | BZ | 0.984221 | 0.033067 | a  |
| 3-hydroxyanthranilate 3,4-dioxygenase     | CZ | -0.33364 | 0.171146 | b  |
| 3-hydroxyanthranilate 3,4-dioxygenase     | DZ | -0.66276 | 0.171641 | b  |
| 3-hydroxyanthranilate 3,4-dioxygenase     | EZ | -0.73035 | 0.199589 | b  |
| 3-hydroxyisobutyrate dehydrogenase        | AZ | -0.77683 | 0.150178 | b  |
| 3-hydroxyisobutyrate dehydrogenase        | BZ | -0.91205 | 0.059318 | b  |
| 3-hydroxyisobutyrate dehydrogenase        | CZ | 0.486076 | 0.13607  | a  |
| 3-hydroxyisobutyrate dehydrogenase        | DZ | 0.401465 | 0.126581 | a  |
| 3-hydroxyisobutyrate dehydrogenase        | EZ | 0.80134  | 0.235893 | a  |
| 3-hydroxyisobutyryl-CoA hydrolase         | AZ | -0.90841 | 0.123829 | b  |
| 3-hydroxyisobutyryl-CoA hydrolase         | BZ | -0.94353 | 0.150456 | b  |

|                                                                        |    |          |          |    |
|------------------------------------------------------------------------|----|----------|----------|----|
| 3-hydroxyisobutyryl-CoA hydrolase                                      | CZ | 0.638615 | 0.12396  | a  |
| 3-hydroxyisobutyryl-CoA hydrolase                                      | DZ | 0.709639 | 0.07942  | a  |
| 3-hydroxyisobutyryl-CoA hydrolase                                      | EZ | 0.50368  | 0.190599 | a  |
| 3-isopropylmalate dehydratase                                          | AZ | -0.96988 | 0.158385 | b  |
| 3-isopropylmalate dehydratase                                          | BZ | -0.83856 | 0.099886 | b  |
| 3-isopropylmalate dehydratase                                          | CZ | 0.552833 | 0.111198 | a  |
| 3-isopropylmalate dehydratase                                          | DZ | 0.826346 | 0.042996 | a  |
| 3-isopropylmalate dehydratase                                          | EZ | 0.42926  | 0.22337  | a  |
| 3-isopropylmalate dehydrogenase                                        | AZ | -0.89443 | 0.164687 | b  |
| 3-isopropylmalate dehydrogenase                                        | BZ | -0.89409 | 0.106388 | b  |
| 3-isopropylmalate dehydrogenase                                        | CZ | 0.589939 | 0.11853  | a  |
| 3-isopropylmalate dehydrogenase                                        | DZ | 0.773226 | 0.050438 | a  |
| 3-isopropylmalate dehydrogenase                                        | EZ | 0.425352 | 0.22058  | a  |
| 3-mercaptopyruvate sulfurtransferase                                   | AZ | -1.02877 | 0.15774  | b  |
| 3-mercaptopyruvate sulfurtransferase                                   | BZ | -0.22402 | 0.205929 | ab |
| 3-mercaptopyruvate sulfurtransferase                                   | CZ | 0.315487 | 0.184408 | a  |
| 3-mercaptopyruvate sulfurtransferase                                   | DZ | 0.814878 | 0.11712  | a  |
| 3-mercaptopyruvate sulfurtransferase                                   | EZ | 0.12243  | 0.175021 | ab |
| 3-methyl-2-oxobutanoate dehydrogenase (2-methylpropanoyl-transferring) | AZ | -0.67831 | 0.13214  | bc |
| 3-methyl-2-oxobutanoate dehydrogenase (2-methylpropanoyl-transferring) | BZ | -0.90648 | 0.031547 | c  |
| 3-methyl-2-oxobutanoate dehydrogenase (2-methylpropanoyl-transferring) | CZ | 0.287492 | 0.22581  | ab |
| 3-methyl-2-oxobutanoate dehydrogenase (2-methylpropanoyl-transferring) | DZ | 1.040566 | 0.126578 | a  |
| 3-methyl-2-oxobutanoate dehydrogenase (2-methylpropanoyl-transferring) | EZ | 0.256738 | 0.169922 | ab |
| 3-methyl-2-oxobutanoate hydroxymethyltransferase                       | AZ | 0.801537 | 0.125182 | a  |
| 3-methyl-2-oxobutanoate hydroxymethyltransferase                       | BZ | 0.911049 | 0.03934  | a  |
| 3-methyl-2-oxobutanoate hydroxymethyltransferase                       | CZ | -0.25136 | 0.195845 | b  |
| 3-methyl-2-oxobutanoate hydroxymethyltransferase                       | DZ | -0.80016 | 0.098401 | b  |
| 3-methyl-2-oxobutanoate hydroxymethyltransferase                       | EZ | -0.66106 | 0.209995 | b  |
| 3-oxo-5-alpha-steroid 4-dehydrogenase (NADP(+))                        | AZ | -0.89015 | 0.116878 | b  |
| 3-oxo-5-alpha-steroid 4-dehydrogenase (NADP(+))                        | BZ | -0.97146 | 0.155143 | b  |
| 3-oxo-5-alpha-steroid 4-dehydrogenase (NADP(+))                        | CZ | 0.64138  | 0.1246   | a  |
| 3-oxo-5-alpha-steroid 4-dehydrogenase (NADP(+))                        | DZ | 0.692759 | 0.082785 | a  |
| 3-oxo-5-alpha-steroid 4-dehydrogenase (NADP(+))                        | EZ | 0.527478 | 0.186038 | a  |
| 3-oxoacid CoA-transferase                                              | AZ | -0.92755 | 0.162304 | b  |
| 3-oxoacid CoA-transferase                                              | BZ | -0.90297 | 0.094453 | b  |
| 3-oxoacid CoA-transferase                                              | CZ | 0.600575 | 0.105088 | a  |
| 3-oxoacid CoA-transferase                                              | DZ | 0.808763 | 0.062495 | a  |
| 3-oxoacid CoA-transferase                                              | EZ | 0.421181 | 0.21539  | a  |
| 3-oxoacyl-[acyl-carrier-protein] reductase                             | AZ | -0.87808 | 0.148988 | b  |
| 3-oxoacyl-[acyl-carrier-protein] reductase                             | BZ | -0.96961 | 0.064726 | b  |
| 3-oxoacyl-[acyl-carrier-protein] reductase                             | CZ | 0.482323 | 0.127316 | a  |
| 3-oxoacyl-[acyl-carrier-protein] reductase                             | DZ | 0.798095 | 0.082617 | a  |
| 3-oxoacyl-[acyl-carrier-protein] reductase                             | EZ | 0.567271 | 0.213192 | a  |
| 3-phytase                                                              | AZ | -0.89582 | 0.098159 | b  |

|                                                   |    |          |          |    |
|---------------------------------------------------|----|----------|----------|----|
| 3-phytase                                         | BZ | -1.04781 | 0.110129 | b  |
| 3-phytase                                         | CZ | 0.689888 | 0.123216 | a  |
| 3-phytase                                         | DZ | 0.705726 | 0.087445 | a  |
| 3-phytase                                         | EZ | 0.548011 | 0.191501 | a  |
| 3',5'-cyclic-nucleotide phosphodiesterase         | AZ | 0.884821 | 0.064693 | a  |
| 3',5'-cyclic-nucleotide phosphodiesterase         | BZ | 0.953264 | 0.018811 | a  |
| 3',5'-cyclic-nucleotide phosphodiesterase         | CZ | -0.33093 | 0.181172 | b  |
| 3',5'-cyclic-nucleotide phosphodiesterase         | DZ | -0.77218 | 0.124458 | b  |
| 3',5'-cyclic-nucleotide phosphodiesterase         | EZ | -0.73497 | 0.200671 | b  |
| 4-aminobutyrate--2-oxoglutarate transaminase      | AZ | -0.92832 | 0.161736 | b  |
| 4-aminobutyrate--2-oxoglutarate transaminase      | BZ | -0.87581 | 0.101735 | b  |
| 4-aminobutyrate--2-oxoglutarate transaminase      | CZ | 0.544279 | 0.117331 | a  |
| 4-aminobutyrate--2-oxoglutarate transaminase      | DZ | 0.804938 | 0.051326 | a  |
| 4-aminobutyrate--2-oxoglutarate transaminase      | EZ | 0.454909 | 0.219305 | a  |
| 4-carboxymuconolactone decarboxylase              | AZ | -0.72824 | 0.069855 | b  |
| 4-carboxymuconolactone decarboxylase              | BZ | -0.77055 | 0.071878 | b  |
| 4-carboxymuconolactone decarboxylase              | CZ | 0.617903 | 0.033573 | a  |
| 4-carboxymuconolactone decarboxylase              | DZ | -0.03075 | 0.280906 | ab |
| 4-carboxymuconolactone decarboxylase              | EZ | 0.911644 | 0.181719 | a  |
| 4-coumarate--CoA ligase                           | AZ | -0.80479 | 0.136435 | b  |
| 4-coumarate--CoA ligase                           | BZ | -0.94622 | 0.046719 | b  |
| 4-coumarate--CoA ligase                           | CZ | 0.403603 | 0.143484 | a  |
| 4-coumarate--CoA ligase                           | DZ | 0.594699 | 0.129728 | a  |
| 4-coumarate--CoA ligase                           | EZ | 0.7527   | 0.224676 | a  |
| 4-hydroxybenzoate polyprenyltransferase           | AZ | -0.91656 | 0.118197 | b  |
| 4-hydroxybenzoate polyprenyltransferase           | BZ | -0.97067 | 0.144817 | b  |
| 4-hydroxybenzoate polyprenyltransferase           | CZ | 0.628638 | 0.111633 | a  |
| 4-hydroxybenzoate polyprenyltransferase           | DZ | 0.673986 | 0.077173 | a  |
| 4-hydroxybenzoate polyprenyltransferase           | EZ | 0.584604 | 0.194848 | a  |
| 4-nitrophenylphosphatase                          | AZ | 0.878353 | 0.085004 | a  |
| 4-nitrophenylphosphatase                          | BZ | 0.968281 | 0.024621 | a  |
| 4-nitrophenylphosphatase                          | CZ | -0.36492 | 0.165003 | b  |
| 4-nitrophenylphosphatase                          | DZ | -0.76481 | 0.128795 | b  |
| 4-nitrophenylphosphatase                          | EZ | -0.7169  | 0.203218 | b  |
| 4a-hydroxytetrahydrobiopterin dehydratase         | AZ | 0.817588 | 0.075649 | a  |
| 4a-hydroxytetrahydrobiopterin dehydratase         | BZ | 0.869721 | 0.025161 | a  |
| 4a-hydroxytetrahydrobiopterin dehydratase         | CZ | -0.44106 | 0.203456 | b  |
| 4a-hydroxytetrahydrobiopterin dehydratase         | DZ | -0.99052 | 0.188157 | b  |
| 4a-hydroxytetrahydrobiopterin dehydratase         | EZ | -0.25573 | 0.153463 | b  |
| 5-amino-6-(5-phosphoribosylamino)uracil reductase | AZ | 0.854312 | 0.061466 | a  |
| 5-amino-6-(5-phosphoribosylamino)uracil reductase | BZ | 0.930703 | 0.015196 | a  |
| 5-amino-6-(5-phosphoribosylamino)uracil reductase | CZ | -0.48146 | 0.210348 | b  |
| 5-amino-6-(5-phosphoribosylamino)uracil reductase | DZ | -0.69709 | 0.154286 | b  |
| 5-amino-6-(5-phosphoribosylamino)uracil reductase | EZ | -0.60647 | 0.184014 | b  |



|                                                   |    |          |          |   |
|---------------------------------------------------|----|----------|----------|---|
| 5-aminolevulinate synthase                        | AZ | 0.866659 | 0.102881 | a |
| 5-aminolevulinate synthase                        | BZ | 0.962763 | 0.033284 | a |
| 5-aminolevulinate synthase                        | CZ | -0.38295 | 0.172962 | b |
| 5-aminolevulinate synthase                        | DZ | -0.76987 | 0.110636 | b |
| 5-aminolevulinate synthase                        | EZ | -0.6766  | 0.205898 | b |
| 5-carboxymethyl-2-hydroxymuconate Delta-isomerase | AZ | -0.86771 | 0.069463 | b |
| 5-carboxymethyl-2-hydroxymuconate Delta-isomerase | BZ | -0.85437 | 0.037858 | b |
| 5-carboxymethyl-2-hydroxymuconate Delta-isomerase | CZ | 0.704846 | 0.237206 | a |
| 5-carboxymethyl-2-hydroxymuconate Delta-isomerase | DZ | 0.562696 | 0.145386 | a |
| 5-carboxymethyl-2-hydroxymuconate Delta-isomerase | EZ | 0.454537 | 0.176614 | a |
| 5-formyltetrahydrofolate cyclo-ligase             | AZ | 0.866798 | 0.103114 | a |
| 5-formyltetrahydrofolate cyclo-ligase             | BZ | 0.96297  | 0.033354 | a |
| 5-formyltetrahydrofolate cyclo-ligase             | CZ | -0.38558 | 0.173327 | b |
| 5-formyltetrahydrofolate cyclo-ligase             | DZ | -0.76467 | 0.109368 | b |
| 5-formyltetrahydrofolate cyclo-ligase             | EZ | -0.67951 | 0.206306 | b |
| 5-oxoprolinase (ATP-hydrolyzing)                  | AZ | -0.84861 | 0.099351 | b |
| 5-oxoprolinase (ATP-hydrolyzing)                  | BZ | -1.00458 | 0.030789 | b |
| 5-oxoprolinase (ATP-hydrolyzing)                  | CZ | 0.459431 | 0.131482 | a |
| 5-oxoprolinase (ATP-hydrolyzing)                  | DZ | 0.712783 | 0.140114 | a |
| 5-oxoprolinase (ATP-hydrolyzing)                  | EZ | 0.680976 | 0.215992 | a |
| 5'-nucleotidase                                   | AZ | 0.84852  | 0.078195 | a |
| 5'-nucleotidase                                   | BZ | 0.918683 | 0.031917 | a |
| 5'-nucleotidase                                   | CZ | -0.36782 | 0.184946 | b |
| 5'-nucleotidase                                   | DZ | -0.54345 | 0.122745 | b |
| 5'-nucleotidase                                   | EZ | -0.85594 | 0.217336 | b |
| 6-phosphofructo-2-kinase                          | AZ | 0.871831 | 0.07449  | a |
| 6-phosphofructo-2-kinase                          | BZ | 0.957877 | 0.019346 | a |
| 6-phosphofructo-2-kinase                          | CZ | -0.45365 | 0.213625 | b |
| 6-phosphofructo-2-kinase                          | DZ | -0.75505 | 0.104492 | b |
| 6-phosphofructo-2-kinase                          | EZ | -0.621   | 0.188585 | b |
| 6-phosphofructokinase                             | AZ | 0.849964 | 0.106549 | a |
| 6-phosphofructokinase                             | BZ | 0.982286 | 0.033704 | a |
| 6-phosphofructokinase                             | CZ | -0.44347 | 0.178775 | b |
| 6-phosphofructokinase                             | DZ | -0.71598 | 0.101052 | b |
| 6-phosphofructokinase                             | EZ | -0.6728  | 0.207064 | b |
| 6-phosphogluconolactonase                         | AZ | 0.815887 | 0.106006 | a |
| 6-phosphogluconolactonase                         | BZ | 0.963728 | 0.036899 | a |
| 6-phosphogluconolactonase                         | CZ | -0.34295 | 0.190561 | b |
| 6-phosphogluconolactonase                         | DZ | -0.8691  | 0.110658 | b |
| 6-phosphogluconolactonase                         | EZ | -0.56756 | 0.198409 | b |
| 7-dehydrocholesterol reductase                    | AZ | 0.76398  | 0.078966 | a |
| 7-dehydrocholesterol reductase                    | BZ | 0.807358 | 0.029013 | a |
| 7-dehydrocholesterol reductase                    | CZ | -0.3341  | 0.216877 | b |
| 7-dehydrocholesterol reductase                    | DZ | -0.94692 | 0.212424 | b |

|                                 |    |          |          |    |
|---------------------------------|----|----------|----------|----|
| 7-dehydrocholesterol reductase  | EZ | -0.29032 | 0.156077 | b  |
| 8-amino-7-oxononanoate synthase | AZ | 0.724009 | 0.075366 | a  |
| 8-amino-7-oxononanoate synthase | BZ | 0.798601 | 0.059547 | a  |
| 8-amino-7-oxononanoate synthase | CZ | 0.082487 | 0.062249 | ab |
| 8-amino-7-oxononanoate synthase | DZ | -0.55836 | 0.127426 | bc |
| 8-amino-7-oxononanoate synthase | EZ | -1.04673 | 0.286099 | c  |
| Acetate kinase                  | AZ | -0.92242 | 0.157569 | b  |
| Acetate kinase                  | BZ | -0.89903 | 0.097209 | b  |
| Acetate kinase                  | CZ | 0.557964 | 0.102889 | a  |
| Acetate kinase                  | DZ | 0.843406 | 0.051023 | a  |
| Acetate kinase                  | EZ | 0.420081 | 0.222757 | a  |
| Acetate--CoA ligase             | AZ | -0.11601 | 0.038818 | a  |
| Acetate--CoA ligase             | BZ | 0.314628 | 0.128264 | a  |
| Acetate--CoA ligase             | CZ | 0.638771 | 0.201298 | a  |
| Acetate--CoA ligase             | DZ | 0.378298 | 0.191059 | a  |
| Acetate--CoA ligase             | EZ | -1.21568 | 0.19479  | b  |
| Acetoacetate--CoA ligase        | AZ | -0.69165 | 0.166661 | bc |
| Acetoacetate--CoA ligase        | BZ | -0.94618 | 0.047433 | c  |
| Acetoacetate--CoA ligase        | CZ | 0.187057 | 0.102806 | ab |
| Acetoacetate--CoA ligase        | DZ | 0.816573 | 0.180614 | a  |
| Acetoacetate--CoA ligase        | EZ | 0.634196 | 0.20713  | a  |
| Acetyl-CoA C-acetyltransferase  | AZ | 0.905191 | 0.087418 | a  |
| Acetyl-CoA C-acetyltransferase  | BZ | 0.959291 | 0.032546 | a  |
| Acetyl-CoA C-acetyltransferase  | CZ | -0.44501 | 0.191458 | b  |
| Acetyl-CoA C-acetyltransferase  | DZ | -0.87239 | 0.078018 | b  |
| Acetyl-CoA C-acetyltransferase  | EZ | -0.54708 | 0.19661  | b  |
| Acetyl-CoA hydrolase            | AZ | 0.791576 | 0.081117 | a  |
| Acetyl-CoA hydrolase            | BZ | 0.8819   | 0.020402 | a  |
| Acetyl-CoA hydrolase            | CZ | -0.631   | 0.278897 | b  |
| Acetyl-CoA hydrolase            | DZ | -0.57816 | 0.100154 | b  |
| Acetyl-CoA hydrolase            | EZ | -0.46432 | 0.166047 | b  |
| Acetylcholinesterase            | AZ | -0.86188 | 0.126618 | b  |
| Acetylcholinesterase            | BZ | -0.90906 | 0.059623 | b  |
| Acetylcholinesterase            | CZ | 0.264927 | 0.156742 | a  |
| Acetylcholinesterase            | DZ | 0.934334 | 0.106546 | a  |
| Acetylcholinesterase            | EZ | 0.571672 | 0.206236 | a  |
| Acetylornithine deacetylase     | AZ | -0.96443 | 0.15407  | b  |
| Acetylornithine deacetylase     | BZ | -0.85747 | 0.094761 | b  |
| Acetylornithine deacetylase     | CZ | 0.554523 | 0.103517 | a  |
| Acetylornithine deacetylase     | DZ | 0.77179  | 0.064101 | a  |
| Acetylornithine deacetylase     | EZ | 0.495589 | 0.227488 | a  |
| Acetylornithine transaminase    | AZ | 0.918532 | 0.100256 | a  |
| Acetylornithine transaminase    | BZ | 0.894741 | 0.063502 | a  |
| Acetylornithine transaminase    | CZ | -0.43012 | 0.206591 | b  |

|                                     |    |          |          |    |
|-------------------------------------|----|----------|----------|----|
| Acetylornithine transaminase        | DZ | -0.82256 | 0.056604 | b  |
| Acetylornithine transaminase        | EZ | -0.56059 | 0.197549 | b  |
| Acetylserotonin O-methyltransferase | AZ | -0.85427 | 0.130181 | b  |
| Acetylserotonin O-methyltransferase | BZ | -0.44374 | 0.213826 | b  |
| Acetylserotonin O-methyltransferase | CZ | 0.210786 | 0.2007   | ab |
| Acetylserotonin O-methyltransferase | DZ | 0.957759 | 0.061869 | a  |
| Acetylserotonin O-methyltransferase | EZ | 0.129469 | 0.194843 | ab |
| Aconitate decarboxylase             | AZ | -0.86325 | 0.081759 | b  |
| Aconitate decarboxylase             | BZ | -1.18338 | 0.063704 | b  |
| Aconitate decarboxylase             | CZ | 0.715246 | 0.102477 | a  |
| Aconitate decarboxylase             | DZ | 0.639747 | 0.089177 | a  |
| Aconitate decarboxylase             | EZ | 0.691636 | 0.183203 | a  |
| Aconitate hydratase                 | AZ | 0.880259 | 0.101058 | a  |
| Aconitate hydratase                 | BZ | 0.94252  | 0.035349 | a  |
| Aconitate hydratase                 | CZ | -0.54797 | 0.200071 | b  |
| Aconitate hydratase                 | DZ | -0.66979 | 0.097226 | b  |
| Aconitate hydratase                 | EZ | -0.60502 | 0.200373 | b  |
| Acyl-CoA oxidase                    | AZ | 0.85663  | 0.071288 | a  |
| Acyl-CoA oxidase                    | BZ | 0.927819 | 0.022358 | a  |
| Acyl-CoA oxidase                    | CZ | -0.26787 | 0.147    | b  |
| Acyl-CoA oxidase                    | DZ | -0.8677  | 0.186179 | b  |
| Acyl-CoA oxidase                    | EZ | -0.64888 | 0.190075 | b  |
| Acylaminoacyl-peptidase             | AZ | 0.829307 | 0.076249 | ab |
| Acylaminoacyl-peptidase             | BZ | 0.886384 | 0.027962 | a  |
| Acylaminoacyl-peptidase             | CZ | -0.07713 | 0.116808 | bc |
| Acylaminoacyl-peptidase             | DZ | -0.98648 | 0.200399 | c  |
| Acylaminoacyl-peptidase             | EZ | -0.65208 | 0.188981 | c  |
| Acylglycerol lipase                 | AZ | 0.87498  | 0.079928 | a  |
| Acylglycerol lipase                 | BZ | 0.947376 | 0.024396 | a  |
| Acylglycerol lipase                 | CZ | -0.30992 | 0.161839 | b  |
| Acylglycerol lipase                 | DZ | -0.8419  | 0.147815 | b  |
| Acylglycerol lipase                 | EZ | -0.67054 | 0.197729 | b  |
| Acylglycerone-phosphate reductase   | AZ | -0.93268 | 0.161856 | b  |
| Acylglycerone-phosphate reductase   | BZ | -0.87443 | 0.096439 | b  |
| Acylglycerone-phosphate reductase   | CZ | 0.536719 | 0.108635 | a  |
| Acylglycerone-phosphate reductase   | DZ | 0.82935  | 0.056622 | a  |
| Acylglycerone-phosphate reductase   | EZ | 0.441046 | 0.221918 | a  |
| Acylphosphatase                     | AZ | -0.939   | 0.167387 | b  |
| Acylphosphatase                     | BZ | -0.8571  | 0.097372 | b  |
| Acylphosphatase                     | CZ | 0.517209 | 0.093246 | a  |
| Acylphosphatase                     | DZ | 0.808125 | 0.08202  | a  |
| Acylphosphatase                     | EZ | 0.470758 | 0.221704 | a  |
| Acylpyruvate hydrolase              | AZ | -0.89546 | 0.084654 | b  |
| Acylpyruvate hydrolase              | BZ | -1.09751 | 0.102114 | b  |

|                                                         |    |          |          |   |
|---------------------------------------------------------|----|----------|----------|---|
| Acylpyruvate hydrolase                                  | CZ | 0.714532 | 0.108073 | a |
| Acylpyruvate hydrolase                                  | DZ | 0.655814 | 0.090976 | a |
| Acylpyruvate hydrolase                                  | EZ | 0.622626 | 0.188986 | a |
| Adenine phosphoribosyltransferase                       | AZ | 0.850296 | 0.112653 | a |
| Adenine phosphoribosyltransferase                       | BZ | 0.954259 | 0.036853 | a |
| Adenine phosphoribosyltransferase                       | CZ | -0.47368 | 0.186904 | b |
| Adenine phosphoribosyltransferase                       | DZ | -0.83542 | 0.124669 | b |
| Adenine phosphoribosyltransferase                       | EZ | -0.49545 | 0.188166 | b |
| Adenosine deaminase                                     | AZ | -0.89759 | 0.158346 | b |
| Adenosine deaminase                                     | BZ | -0.92757 | 0.100243 | b |
| Adenosine deaminase                                     | CZ | 0.582675 | 0.098058 | a |
| Adenosine deaminase                                     | DZ | 0.777766 | 0.068548 | a |
| Adenosine deaminase                                     | EZ | 0.464713 | 0.221905 | a |
| Adenosine kinase                                        | AZ | 0.866836 | 0.103113 | a |
| Adenosine kinase                                        | BZ | 0.96292  | 0.033339 | a |
| Adenosine kinase                                        | CZ | -0.38554 | 0.173326 | b |
| Adenosine kinase                                        | DZ | -0.76463 | 0.109367 | b |
| Adenosine kinase                                        | EZ | -0.67959 | 0.206313 | b |
| Adenosinetriphosphatase                                 | AZ | 0.898478 | 0.085302 | a |
| Adenosinetriphosphatase                                 | BZ | 0.970118 | 0.02882  | a |
| Adenosinetriphosphatase                                 | CZ | -0.44172 | 0.175429 | b |
| Adenosinetriphosphatase                                 | DZ | -0.78409 | 0.11285  | b |
| Adenosinetriphosphatase                                 | EZ | -0.64279 | 0.19952  | b |
| Adenosylhomocysteinase                                  | AZ | 0.866802 | 0.103111 | a |
| Adenosylhomocysteinase                                  | BZ | 0.962972 | 0.033353 | a |
| Adenosylhomocysteinase                                  | CZ | -0.38555 | 0.173323 | b |
| Adenosylhomocysteinase                                  | DZ | -0.76463 | 0.109365 | b |
| Adenosylhomocysteinase                                  | EZ | -0.67959 | 0.206309 | b |
| Adenosylmethionine decarboxylase                        | AZ | 0.866802 | 0.103111 | a |
| Adenosylmethionine decarboxylase                        | BZ | 0.962972 | 0.033353 | a |
| Adenosylmethionine decarboxylase                        | CZ | -0.38555 | 0.173323 | b |
| Adenosylmethionine decarboxylase                        | DZ | -0.76463 | 0.109365 | b |
| Adenosylmethionine decarboxylase                        | EZ | -0.67959 | 0.206309 | b |
| Adenosylmethionine--8-amino-7-oxononanoate transaminase | AZ | -0.9427  | 0.161457 | b |
| Adenosylmethionine--8-amino-7-oxononanoate transaminase | BZ | -0.88965 | 0.091169 | b |
| Adenosylmethionine--8-amino-7-oxononanoate transaminase | CZ | 0.595373 | 0.107227 | a |
| Adenosylmethionine--8-amino-7-oxononanoate transaminase | DZ | 0.819858 | 0.059157 | a |
| Adenosylmethionine--8-amino-7-oxononanoate transaminase | EZ | 0.417115 | 0.215833 | a |
| Adenylate cyclase                                       | AZ | 0.885221 | 0.078712 | a |
| Adenylate cyclase                                       | BZ | 0.967134 | 0.022833 | a |
| Adenylate cyclase                                       | CZ | -0.37167 | 0.169601 | b |
| Adenylate cyclase                                       | DZ | -0.80297 | 0.131711 | b |
| Adenylate cyclase                                       | EZ | -0.67771 | 0.19777  | b |
| Adenylate kinase                                        | AZ | 0.875087 | 0.095509 | a |

|                           |    |          |          |   |
|---------------------------|----|----------|----------|---|
| Adenylate kinase          | BZ | 0.975609 | 0.027489 | a |
| Adenylate kinase          | CZ | -0.36227 | 0.162888 | b |
| Adenylate kinase          | DZ | -0.81198 | 0.120773 | b |
| Adenylate kinase          | EZ | -0.67644 | 0.201786 | b |
| Adenylosuccinate lyase    | AZ | 0.866802 | 0.103111 | a |
| Adenylosuccinate lyase    | BZ | 0.962972 | 0.033353 | a |
| Adenylosuccinate lyase    | CZ | -0.38555 | 0.173323 | b |
| Adenylosuccinate lyase    | DZ | -0.76463 | 0.109365 | b |
| Adenylosuccinate lyase    | EZ | -0.67959 | 0.206309 | b |
| Adenylosuccinate synthase | AZ | 0.863605 | 0.092215 | a |
| Adenylosuccinate synthase | BZ | 0.915556 | 0.039169 | a |
| Adenylosuccinate synthase | CZ | -0.10877 | 0.153303 | b |
| Adenylosuccinate synthase | DZ | -0.97245 | 0.104261 | b |
| Adenylosuccinate synthase | EZ | -0.69794 | 0.210134 | b |
| Adenylyl-sulfate kinase   | AZ | 0.845264 | 0.106492 | a |
| Adenylyl-sulfate kinase   | BZ | 0.956745 | 0.030162 | a |
| Adenylyl-sulfate kinase   | CZ | -0.32892 | 0.163326 | b |
| Adenylyl-sulfate kinase   | DZ | -0.86585 | 0.139926 | b |
| Adenylyl-sulfate kinase   | EZ | -0.60724 | 0.196653 | b |
| ADP-ribose diphosphatase  | AZ | -0.93422 | 0.15413  | b |
| ADP-ribose diphosphatase  | BZ | -0.91465 | 0.097549 | b |
| ADP-ribose diphosphatase  | CZ | 0.593943 | 0.10242  | a |
| ADP-ribose diphosphatase  | DZ | 0.812451 | 0.061338 | a |
| ADP-ribose diphosphatase  | EZ | 0.442483 | 0.215814 | a |
| ADP-sugar diphosphatase   | AZ | -0.90944 | 0.121377 | b |
| ADP-sugar diphosphatase   | BZ | -0.91925 | 0.166545 | b |
| ADP-sugar diphosphatase   | CZ | 0.670619 | 0.113368 | a |
| ADP-sugar diphosphatase   | DZ | 0.584272 | 0.092779 | a |
| ADP-sugar diphosphatase   | EZ | 0.573801 | 0.190911 | a |
| Agmatinase                | AZ | -0.91258 | 0.163373 | b |
| Agmatinase                | BZ | -0.9022  | 0.109204 | b |
| Agmatinase                | CZ | 0.531128 | 0.094462 | a |
| Agmatinase                | DZ | 0.810703 | 0.058727 | a |
| Agmatinase                | EZ | 0.472953 | 0.220277 | a |
| Agmatine deiminase        | AZ | -0.88284 | 0.086441 | b |
| Agmatine deiminase        | BZ | -1.15767 | 0.059599 | b |
| Agmatine deiminase        | CZ | 0.744477 | 0.101531 | a |
| Agmatine deiminase        | DZ | 0.637049 | 0.091586 | a |
| Agmatine deiminase        | EZ | 0.658991 | 0.18596  | a |
| Alanine transaminase      | AZ | 0.866802 | 0.103111 | a |
| Alanine transaminase      | BZ | 0.962972 | 0.033353 | a |
| Alanine transaminase      | CZ | -0.38555 | 0.173323 | b |
| Alanine transaminase      | DZ | -0.76463 | 0.109365 | b |
| Alanine transaminase      | EZ | -0.67959 | 0.206309 | b |

|                                    |    |          |          |    |
|------------------------------------|----|----------|----------|----|
| Alanine--glyoxylate transaminase   | AZ | 0.833315 | 0.092173 | a  |
| Alanine--glyoxylate transaminase   | BZ | 0.915836 | 0.029702 | a  |
| Alanine--glyoxylate transaminase   | CZ | -0.38509 | 0.17604  | b  |
| Alanine--glyoxylate transaminase   | DZ | -0.87405 | 0.176188 | b  |
| Alanine--glyoxylate transaminase   | EZ | -0.49001 | 0.185238 | b  |
| Alanine--tRNA ligase               | AZ | 0.866921 | 0.103381 | a  |
| Alanine--tRNA ligase               | BZ | 0.963281 | 0.03345  | a  |
| Alanine--tRNA ligase               | CZ | -0.38432 | 0.172752 | b  |
| Alanine--tRNA ligase               | DZ | -0.76825 | 0.109787 | b  |
| Alanine--tRNA ligase               | EZ | -0.67763 | 0.206081 | b  |
| Alcohol dehydrogenase              | AZ | -0.89029 | 0.149466 | b  |
| Alcohol dehydrogenase              | BZ | -0.94853 | 0.072014 | b  |
| Alcohol dehydrogenase              | CZ | 0.502801 | 0.132829 | a  |
| Alcohol dehydrogenase              | DZ | 0.769377 | 0.072391 | a  |
| Alcohol dehydrogenase              | EZ | 0.566642 | 0.21606  | a  |
| Alcohol dehydrogenase (NADP(+))    | AZ | -0.52826 | 0.010335 | b  |
| Alcohol dehydrogenase (NADP(+))    | BZ | -0.7596  | 0.085392 | b  |
| Alcohol dehydrogenase (NADP(+))    | CZ | 0.938726 | 0.179561 | a  |
| Alcohol dehydrogenase (NADP(+))    | DZ | 0.234359 | 0.254608 | ab |
| Alcohol dehydrogenase (NADP(+))    | EZ | 0.11478  | 0.212757 | ab |
| Aldehyde dehydrogenase (NAD(+))    | AZ | 0.77193  | 0.047319 | a  |
| Aldehyde dehydrogenase (NAD(+))    | BZ | 0.80499  | 0.03553  | a  |
| Aldehyde dehydrogenase (NAD(+))    | CZ | -0.22309 | 0.11892  | ab |
| Aldehyde dehydrogenase (NAD(+))    | DZ | -0.36635 | 0.178952 | b  |
| Aldehyde dehydrogenase (NAD(+))    | EZ | -0.98748 | 0.264922 | b  |
| Aldehyde dehydrogenase (NAD(P)(+)) | AZ | -0.8968  | 0.156489 | b  |
| Aldehyde dehydrogenase (NAD(P)(+)) | BZ | -0.95382 | 0.096224 | b  |
| Aldehyde dehydrogenase (NAD(P)(+)) | CZ | 0.636348 | 0.101717 | a  |
| Aldehyde dehydrogenase (NAD(P)(+)) | DZ | 0.770264 | 0.074567 | a  |
| Aldehyde dehydrogenase (NAD(P)(+)) | EZ | 0.444015 | 0.211835 | a  |
| Aldehyde reductase                 | AZ | 0.793509 | 0.106619 | a  |
| Aldehyde reductase                 | BZ | 0.90139  | 0.03699  | a  |
| Aldehyde reductase                 | CZ | -0.00339 | 0.096463 | ab |
| Aldehyde reductase                 | DZ | -1.00496 | 0.146269 | c  |
| Aldehyde reductase                 | EZ | -0.68655 | 0.22448  | bc |
| Aldose 1-epimerase                 | AZ | -0.84678 | 0.11255  | b  |
| Aldose 1-epimerase                 | BZ | -0.9787  | 0.033489 | b  |
| Aldose 1-epimerase                 | CZ | 0.32916  | 0.122168 | a  |
| Aldose 1-epimerase                 | DZ | 0.92763  | 0.160093 | a  |
| Aldose 1-epimerase                 | EZ | 0.568689 | 0.193129 | a  |
| Alkaline phosphatase               | AZ | 0.760335 | 0.107797 | a  |
| Alkaline phosphatase               | BZ | 0.880953 | 0.030842 | a  |
| Alkaline phosphatase               | CZ | -0.44873 | 0.215645 | b  |
| Alkaline phosphatase               | DZ | -0.55206 | 0.180943 | b  |

|                                          |    |          |          |    |
|------------------------------------------|----|----------|----------|----|
| Alkaline phosphatase                     | EZ | -0.6405  | 0.186165 | b  |
| Alkane 1-monooxygenase                   | AZ | -0.88194 | 0.175392 | b  |
| Alkane 1-monooxygenase                   | BZ | -0.81252 | 0.114699 | b  |
| Alkane 1-monooxygenase                   | CZ | 0.369332 | 0.167002 | a  |
| Alkane 1-monooxygenase                   | DZ | 0.73498  | 0.105703 | a  |
| Alkane 1-monooxygenase                   | EZ | 0.590156 | 0.184048 | a  |
| All-trans-retinol dehydrogenase (NAD(+)) | AZ | 0.735606 | 0.079903 | a  |
| All-trans-retinol dehydrogenase (NAD(+)) | BZ | 0.831071 | 0.020421 | a  |
| All-trans-retinol dehydrogenase (NAD(+)) | CZ | -0.24118 | 0.223006 | ab |
| All-trans-retinol dehydrogenase (NAD(+)) | DZ | -0.82223 | 0.191062 | b  |
| All-trans-retinol dehydrogenase (NAD(+)) | EZ | -0.50326 | 0.189728 | b  |
| Allantoate deiminase                     | AZ | -0.64945 | 0.05381  | b  |
| Allantoate deiminase                     | BZ | -1.32807 | 0.163081 | b  |
| Allantoate deiminase                     | CZ | 0.694551 | 0.085139 | a  |
| Allantoate deiminase                     | DZ | 0.593633 | 0.082142 | a  |
| Allantoate deiminase                     | EZ | 0.689333 | 0.147433 | a  |
| Allantoicase                             | AZ | 0.846958 | 0.098581 | a  |
| Allantoicase                             | BZ | 0.972545 | 0.034316 | a  |
| Allantoicase                             | CZ | -0.43422 | 0.1869   | b  |
| Allantoicase                             | DZ | -0.78425 | 0.112824 | b  |
| Allantoicase                             | EZ | -0.60102 | 0.200106 | b  |
| Allantoin racemase                       | AZ | -0.72824 | 0.069862 | b  |
| Allantoin racemase                       | BZ | -0.77056 | 0.071886 | b  |
| Allantoin racemase                       | CZ | 0.61804  | 0.033576 | a  |
| Allantoin racemase                       | DZ | -0.03068 | 0.280935 | ab |
| Allantoin racemase                       | EZ | 0.911445 | 0.181693 | a  |
| Allantoinase                             | AZ | -0.93769 | 0.154765 | b  |
| Allantoinase                             | BZ | -0.90066 | 0.100384 | b  |
| Allantoinase                             | CZ | 0.549694 | 0.106665 | a  |
| Allantoinase                             | DZ | 0.837492 | 0.048612 | a  |
| Allantoinase                             | EZ | 0.451165 | 0.217606 | a  |
| Alpha-1,3-glucan synthase                | AZ | -0.96581 | 0.147854 | b  |
| Alpha-1,3-glucan synthase                | BZ | -0.83551 | 0.099379 | b  |
| Alpha-1,3-glucan synthase                | CZ | 0.549295 | 0.11721  | a  |
| Alpha-1,3-glucan synthase                | DZ | 0.816812 | 0.040505 | a  |
| Alpha-1,3-glucan synthase                | EZ | 0.435212 | 0.231139 | a  |
| Alpha-amylase                            | AZ | -0.93923 | 0.157641 | b  |
| Alpha-amylase                            | BZ | -0.86373 | 0.098542 | b  |
| Alpha-amylase                            | CZ | 0.555636 | 0.114115 | a  |
| Alpha-amylase                            | DZ | 0.80658  | 0.048207 | a  |
| Alpha-amylase                            | EZ | 0.440743 | 0.225845 | a  |
| Alpha-galactosidase                      | AZ | -0.96468 | 0.159844 | b  |
| Alpha-galactosidase                      | BZ | -0.86409 | 0.089795 | b  |
| Alpha-galactosidase                      | CZ | 0.559489 | 0.109343 | a  |

|                               |    |          |          |    |
|-------------------------------|----|----------|----------|----|
| Alpha-galactosidase           | DZ | 0.840332 | 0.039418 | a  |
| Alpha-galactosidase           | EZ | 0.428956 | 0.221029 | a  |
| Alpha-glucosidase             | AZ | -0.7074  | 0.170056 | b  |
| Alpha-glucosidase             | BZ | -0.83967 | 0.063687 | b  |
| Alpha-glucosidase             | CZ | 0.481847 | 0.177351 | a  |
| Alpha-glucosidase             | DZ | 0.603448 | 0.196551 | a  |
| Alpha-glucosidase             | EZ | 0.461776 | 0.190231 | a  |
| Alpha-glucuronidase           | AZ | -0.85176 | 0.088806 | b  |
| Alpha-glucuronidase           | BZ | -1.17153 | 0.052557 | b  |
| Alpha-glucuronidase           | CZ | 0.744305 | 0.114847 | a  |
| Alpha-glucuronidase           | DZ | 0.664138 | 0.100401 | a  |
| Alpha-glucuronidase           | EZ | 0.614842 | 0.180355 | a  |
| Alpha-L-fucosidase            | AZ | -0.79773 | 0.172644 | b  |
| Alpha-L-fucosidase            | BZ | -0.96153 | 0.109987 | b  |
| Alpha-L-fucosidase            | CZ | 0.68229  | 0.108077 | a  |
| Alpha-L-fucosidase            | DZ | 0.581401 | 0.084515 | a  |
| Alpha-L-fucosidase            | EZ | 0.495561 | 0.220844 | a  |
| Alpha-L-rhamnosidase          | AZ | -0.87526 | 0.090746 | b  |
| Alpha-L-rhamnosidase          | BZ | -1.14863 | 0.057666 | b  |
| Alpha-L-rhamnosidase          | CZ | 0.748858 | 0.108557 | a  |
| Alpha-L-rhamnosidase          | DZ | 0.65185  | 0.096379 | a  |
| Alpha-L-rhamnosidase          | EZ | 0.62318  | 0.185452 | a  |
| Alpha-mannosidase             | AZ | 0.80542  | 0.107552 | a  |
| Alpha-mannosidase             | BZ | 0.900695 | 0.036966 | a  |
| Alpha-mannosidase             | CZ | -0.36344 | 0.173677 | b  |
| Alpha-mannosidase             | DZ | -0.63419 | 0.168236 | b  |
| Alpha-mannosidase             | EZ | -0.70849 | 0.209259 | b  |
| Alpha-methylacyl-CoA racemase | AZ | -0.84034 | 0.107333 | b  |
| Alpha-methylacyl-CoA racemase | BZ | -0.99083 | 0.028674 | b  |
| Alpha-methylacyl-CoA racemase | CZ | 0.379832 | 0.178788 | a  |
| Alpha-methylacyl-CoA racemase | DZ | 0.820751 | 0.105028 | a  |
| Alpha-methylacyl-CoA racemase | EZ | 0.630583 | 0.198718 | a  |
| Alpha-N-acetylglucosaminidase | AZ | -0.99589 | 0.157305 | b  |
| Alpha-N-acetylglucosaminidase | BZ | -0.70972 | 0.126247 | b  |
| Alpha-N-acetylglucosaminidase | CZ | 0.280344 | 0.103604 | a  |
| Alpha-N-acetylglucosaminidase | DZ | 0.996849 | 0.059628 | a  |
| Alpha-N-acetylglucosaminidase | EZ | 0.428411 | 0.217856 | a  |
| Alpha,alpha-phosphotrehalase  | AZ | -0.87941 | 0.134089 | b  |
| Alpha,alpha-phosphotrehalase  | BZ | -0.38624 | 0.146626 | b  |
| Alpha,alpha-phosphotrehalase  | CZ | 0.273466 | 0.184423 | ab |
| Alpha,alpha-phosphotrehalase  | DZ | 0.115406 | 0.155456 | ab |
| Alpha,alpha-phosphotrehalase  | EZ | 0.876778 | 0.231027 | a  |
| Alpha,alpha-trehalase         | AZ | 0.836913 | 0.112511 | a  |
| Alpha,alpha-trehalase         | BZ | 0.955829 | 0.035861 | a  |



|                                                 |    |          |          |   |
|-------------------------------------------------|----|----------|----------|---|
| Alpha,alpha-trehalase                           | CZ | -0.37811 | 0.165941 | b |
| Alpha,alpha-trehalase                           | DZ | -0.86194 | 0.121365 | b |
| Alpha,alpha-trehalase                           | EZ | -0.55269 | 0.208612 | b |
| Amidase                                         | AZ | -0.93997 | 0.15592  | b |
| Amidase                                         | BZ | -0.88479 | 0.096711 | b |
| Amidase                                         | CZ | 0.593855 | 0.104979 | a |
| Amidase                                         | DZ | 0.737203 | 0.061482 | a |
| Amidase                                         | EZ | 0.4937   | 0.226323 | a |
| Amidophosphoribosyltransferase                  | AZ | 0.861107 | 0.107153 | a |
| Amidophosphoribosyltransferase                  | BZ | 0.961047 | 0.034661 | a |
| Amidophosphoribosyltransferase                  | CZ | -0.43803 | 0.179481 | b |
| Amidophosphoribosyltransferase                  | DZ | -0.77577 | 0.122213 | b |
| Amidophosphoribosyltransferase                  | EZ | -0.60835 | 0.19678  | b |
| Amino-acid N-acetyltransferase                  | AZ | 0.8788   | 0.10373  | a |
| Amino-acid N-acetyltransferase                  | BZ | 0.940157 | 0.040595 | a |
| Amino-acid N-acetyltransferase                  | CZ | -0.37448 | 0.173266 | b |
| Amino-acid N-acetyltransferase                  | DZ | -0.75024 | 0.108158 | b |
| Amino-acid N-acetyltransferase                  | EZ | -0.69424 | 0.20931  | b |
| Aminoacyl-tRNA hydrolase                        | AZ | 0.873553 | 0.101552 | a |
| Aminoacyl-tRNA hydrolase                        | BZ | 0.974185 | 0.031012 | a |
| Aminoacyl-tRNA hydrolase                        | CZ | -0.47708 | 0.179476 | b |
| Aminoacyl-tRNA hydrolase                        | DZ | -0.69822 | 0.106369 | b |
| Aminoacyl-tRNA hydrolase                        | EZ | -0.67244 | 0.203048 | b |
| Aminobutyraldehyde dehydrogenase                | AZ | 0.883301 | 0.066085 | a |
| Aminobutyraldehyde dehydrogenase                | BZ | 0.894713 | 0.031558 | a |
| Aminobutyraldehyde dehydrogenase                | CZ | -0.31346 | 0.197802 | b |
| Aminobutyraldehyde dehydrogenase                | DZ | -0.82363 | 0.117642 | b |
| Aminobutyraldehyde dehydrogenase                | EZ | -0.64093 | 0.208002 | b |
| Aminocarboxymuconate-semialdehyde decarboxylase | AZ | -0.91652 | 0.159754 | b |
| Aminocarboxymuconate-semialdehyde decarboxylase | BZ | -0.86667 | 0.102834 | b |
| Aminocarboxymuconate-semialdehyde decarboxylase | CZ | 0.514978 | 0.109972 | a |
| Aminocarboxymuconate-semialdehyde decarboxylase | DZ | 0.803359 | 0.055229 | a |
| Aminocarboxymuconate-semialdehyde decarboxylase | EZ | 0.464859 | 0.229932 | a |
| Aminomethyltransferase                          | AZ | 0.875705 | 0.076128 | a |
| Aminomethyltransferase                          | BZ | 0.95596  | 0.023849 | a |
| Aminomethyltransferase                          | CZ | -0.26731 | 0.153823 | b |
| Aminomethyltransferase                          | DZ | -0.89716 | 0.134624 | b |
| Aminomethyltransferase                          | EZ | -0.66719 | 0.204303 | b |
| Aminopeptidase Y                                | AZ | -0.86897 | 0.13411  | b |
| Aminopeptidase Y                                | BZ | -0.968   | 0.099594 | b |
| Aminopeptidase Y                                | CZ | 0.560967 | 0.083989 | a |
| Aminopeptidase Y                                | DZ | 0.553622 | 0.149273 | a |
| Aminopeptidase Y                                | EZ | 0.722378 | 0.20249  | a |
| AMP deaminase                                   | AZ | 0.869025 | 0.10533  | a |

|                                           |    |          |          |    |
|-------------------------------------------|----|----------|----------|----|
| AMP deaminase                             | BZ | 0.963664 | 0.034347 | a  |
| AMP deaminase                             | CZ | -0.40843 | 0.176468 | b  |
| AMP deaminase                             | DZ | -0.78356 | 0.110293 | b  |
| AMP deaminase                             | EZ | -0.64071 | 0.201652 | b  |
| Anthranilate phosphoribosyltransferase    | AZ | 0.742783 | 0.098462 | a  |
| Anthranilate phosphoribosyltransferase    | BZ | 0.982803 | 0.032113 | a  |
| Anthranilate phosphoribosyltransferase    | CZ | -0.32153 | 0.168088 | b  |
| Anthranilate phosphoribosyltransferase    | DZ | -0.63433 | 0.169481 | b  |
| Anthranilate phosphoribosyltransferase    | EZ | -0.76973 | 0.203724 | b  |
| Anthranilate synthase                     | AZ | -0.91493 | 0.034543 | b  |
| Anthranilate synthase                     | BZ | -0.88388 | 0.01898  | b  |
| Anthranilate synthase                     | CZ | 0.429592 | 0.215576 | a  |
| Anthranilate synthase                     | DZ | 0.794756 | 0.137551 | a  |
| Anthranilate synthase                     | EZ | 0.574459 | 0.18662  | a  |
| Apyrase                                   | AZ | 0.88203  | 0.058057 | a  |
| Apyrase                                   | BZ | 0.889519 | 0.023205 | a  |
| Apyrase                                   | CZ | -0.29867 | 0.13967  | b  |
| Apyrase                                   | DZ | -0.89417 | 0.203732 | b  |
| Apyrase                                   | EZ | -0.57871 | 0.188238 | b  |
| Arabinan endo-1,5-alpha-L-arabinosidase   | AZ | -0.90106 | 0.10254  | b  |
| Arabinan endo-1,5-alpha-L-arabinosidase   | BZ | -1.01361 | 0.134814 | b  |
| Arabinan endo-1,5-alpha-L-arabinosidase   | CZ | 0.680444 | 0.119216 | a  |
| Arabinan endo-1,5-alpha-L-arabinosidase   | DZ | 0.661577 | 0.087218 | a  |
| Arabinan endo-1,5-alpha-L-arabinosidase   | EZ | 0.572647 | 0.189987 | a  |
| Arabinogalactan endo-beta-1,4-galactanase | AZ | -0.912   | 0.166805 | b  |
| Arabinogalactan endo-beta-1,4-galactanase | BZ | -0.89661 | 0.089719 | b  |
| Arabinogalactan endo-beta-1,4-galactanase | CZ | 0.513202 | 0.09356  | a  |
| Arabinogalactan endo-beta-1,4-galactanase | DZ | 0.862571 | 0.05819  | a  |
| Arabinogalactan endo-beta-1,4-galactanase | EZ | 0.432838 | 0.224648 | a  |
| Arabinose-5-phosphate isomerase           | AZ | -0.84104 | 0.193978 | c  |
| Arabinose-5-phosphate isomerase           | BZ | -0.68239 | 0.188306 | bc |
| Arabinose-5-phosphate isomerase           | CZ | 0.437362 | 0.118883 | ab |
| Arabinose-5-phosphate isomerase           | DZ | 0.657    | 0.149206 | a  |
| Arabinose-5-phosphate isomerase           | EZ | 0.429065 | 0.177528 | ab |
| Arachidonate 15-lipoxygenase              | AZ | -1.01217 | 0.142246 | b  |
| Arachidonate 15-lipoxygenase              | BZ | -0.35808 | 0.189886 | ab |
| Arachidonate 15-lipoxygenase              | CZ | 0.234968 | 0.16442  | a  |
| Arachidonate 15-lipoxygenase              | DZ | 0.710749 | 0.126142 | a  |
| Arachidonate 15-lipoxygenase              | EZ | 0.424533 | 0.214705 | a  |
| Aralkylamine N-acetyltransferase          | AZ | -0.91106 | 0.162697 | b  |
| Aralkylamine N-acetyltransferase          | BZ | -0.87113 | 0.106174 | b  |
| Aralkylamine N-acetyltransferase          | CZ | 0.576124 | 0.101008 | a  |
| Aralkylamine N-acetyltransferase          | DZ | 0.778292 | 0.07561  | a  |
| Aralkylamine N-acetyltransferase          | EZ | 0.427773 | 0.225522 | a  |

|                                      |    |          |          |    |
|--------------------------------------|----|----------|----------|----|
| Arginase                             | AZ | 0.531459 | 0.086381 | a  |
| Arginase                             | BZ | 0.563479 | 0.043507 | a  |
| Arginase                             | CZ | 0.457826 | 0.240053 | a  |
| Arginase                             | DZ | -1.21652 | 0.130166 | b  |
| Arginase                             | EZ | -0.33625 | 0.189605 | ab |
| Argininosuccinate synthase           | AZ | 0.843346 | 0.101536 | a  |
| Argininosuccinate synthase           | BZ | 0.913378 | 0.039944 | a  |
| Argininosuccinate synthase           | CZ | -0.14373 | 0.172863 | b  |
| Argininosuccinate synthase           | DZ | -1.01319 | 0.111589 | b  |
| Argininosuccinate synthase           | EZ | -0.59981 | 0.195289 | b  |
| Arginyltransferase                   | AZ | 0.866659 | 0.102881 | a  |
| Arginyltransferase                   | BZ | 0.962763 | 0.033284 | a  |
| Arginyltransferase                   | CZ | -0.38295 | 0.172962 | b  |
| Arginyltransferase                   | DZ | -0.76987 | 0.110636 | b  |
| Arginyltransferase                   | EZ | -0.6766  | 0.205898 | b  |
| Aromatic-L-amino-acid decarboxylase  | AZ | 0.870638 | 0.093979 | a  |
| Aromatic-L-amino-acid decarboxylase  | BZ | 0.878258 | 0.04422  | a  |
| Aromatic-L-amino-acid decarboxylase  | CZ | -0.1055  | 0.157248 | b  |
| Aromatic-L-amino-acid decarboxylase  | DZ | -0.86448 | 0.112855 | b  |
| Aromatic-L-amino-acid decarboxylase  | EZ | -0.77892 | 0.216849 | b  |
| Arsenite methyltransferase           | AZ | -1.12432 | 0.147484 | b  |
| Arsenite methyltransferase           | BZ | -0.66541 | 0.095025 | b  |
| Arsenite methyltransferase           | CZ | 0.564915 | 0.12373  | a  |
| Arsenite methyltransferase           | DZ | 0.751213 | 0.054236 | a  |
| Arsenite methyltransferase           | EZ | 0.473605 | 0.224137 | a  |
| Arsenite-transporting ATPase         | AZ | 0.866641 | 0.102984 | a  |
| Arsenite-transporting ATPase         | BZ | 0.962692 | 0.033312 | a  |
| Arsenite-transporting ATPase         | CZ | -0.38728 | 0.173973 | b  |
| Arsenite-transporting ATPase         | DZ | -0.76278 | 0.10923  | b  |
| Arsenite-transporting ATPase         | EZ | -0.67928 | 0.206236 | b  |
| Aryl-alcohol dehydrogenase (NADP(+)) | AZ | -0.92898 | 0.143861 | b  |
| Aryl-alcohol dehydrogenase (NADP(+)) | BZ | -0.85247 | 0.083249 | b  |
| Aryl-alcohol dehydrogenase (NADP(+)) | CZ | 0.219757 | 0.139053 | a  |
| Aryl-alcohol dehydrogenase (NADP(+)) | DZ | 1.091646 | 0.043192 | a  |
| Aryl-alcohol dehydrogenase (NADP(+)) | EZ | 0.470056 | 0.196568 | a  |
| Arylamine N-acetyltransferase        | AZ | -0.87352 | 0.155856 | b  |
| Arylamine N-acetyltransferase        | BZ | -0.92193 | 0.09937  | b  |
| Arylamine N-acetyltransferase        | CZ | 0.540936 | 0.09249  | a  |
| Arylamine N-acetyltransferase        | DZ | 0.781844 | 0.078542 | a  |
| Arylamine N-acetyltransferase        | EZ | 0.472669 | 0.232586 | a  |
| Arylformamidase                      | AZ | -0.92228 | 0.149612 | b  |
| Arylformamidase                      | BZ | -1.00836 | 0.076179 | b  |
| Arylformamidase                      | CZ | 0.546806 | 0.109475 | a  |
| Arylformamidase                      | DZ | 0.842484 | 0.11135  | a  |

|                                             |    |          |          |   |
|---------------------------------------------|----|----------|----------|---|
| Arylformamidase                             | EZ | 0.541348 | 0.170201 | a |
| Arylsulfatase                               | AZ | -0.97632 | 0.158391 | b |
| Arylsulfatase                               | BZ | -0.80861 | 0.099329 | b |
| Arylsulfatase                               | CZ | 0.552167 | 0.110364 | a |
| Arylsulfatase                               | DZ | 0.801388 | 0.052739 | a |
| Arylsulfatase                               | EZ | 0.431369 | 0.230375 | a |
| Asparaginase                                | AZ | -0.8842  | 0.110601 | b |
| Asparaginase                                | BZ | -0.96548 | 0.04262  | b |
| Asparaginase                                | CZ | 0.458214 | 0.160136 | a |
| Asparaginase                                | DZ | 0.807971 | 0.115746 | a |
| Asparaginase                                | EZ | 0.583498 | 0.202607 | a |
| Asparagine synthase (glutamine-hydrolyzing) | AZ | -0.8403  | 0.114027 | b |
| Asparagine synthase (glutamine-hydrolyzing) | BZ | -0.9392  | 0.054708 | b |
| Asparagine synthase (glutamine-hydrolyzing) | CZ | 0.331036 | 0.120993 | a |
| Asparagine synthase (glutamine-hydrolyzing) | DZ | 0.879047 | 0.170206 | a |
| Asparagine synthase (glutamine-hydrolyzing) | EZ | 0.569419 | 0.201638 | a |
| Asparagine--tRNA ligase                     | AZ | 0.867961 | 0.102485 | a |
| Asparagine--tRNA ligase                     | BZ | 0.962087 | 0.033225 | a |
| Asparagine--tRNA ligase                     | CZ | -0.37875 | 0.172483 | b |
| Asparagine--tRNA ligase                     | DZ | -0.77404 | 0.110452 | b |
| Asparagine--tRNA ligase                     | EZ | -0.67726 | 0.205988 | b |
| Aspartate kinase                            | AZ | 0.849117 | 0.094825 | a |
| Aspartate kinase                            | BZ | 0.920569 | 0.036605 | a |
| Aspartate kinase                            | CZ | -0.07753 | 0.146605 | b |
| Aspartate kinase                            | DZ | -0.93681 | 0.110797 | b |
| Aspartate kinase                            | EZ | -0.75535 | 0.211585 | b |
| Aspartate--tRNA ligase                      | AZ | -0.86215 | 0.084155 | b |
| Aspartate--tRNA ligase                      | BZ | -0.88649 | 0.04549  | b |
| Aspartate--tRNA ligase                      | CZ | 0.273846 | 0.164365 | a |
| Aspartate--tRNA ligase                      | DZ | 1.043286 | 0.155505 | a |
| Aspartate--tRNA ligase                      | EZ | 0.431503 | 0.188975 | a |
| Aspartate-semialdehyde dehydrogenase        | AZ | 0.848002 | 0.086503 | a |
| Aspartate-semialdehyde dehydrogenase        | BZ | 0.902721 | 0.032569 | a |
| Aspartate-semialdehyde dehydrogenase        | CZ | -0.31661 | 0.174151 | b |
| Aspartate-semialdehyde dehydrogenase        | DZ | -0.62862 | 0.093448 | b |
| Aspartate-semialdehyde dehydrogenase        | EZ | -0.8055  | 0.241833 | b |
| Aspartyl aminopeptidase                     | AZ | 0.869743 | 0.1032   | a |
| Aspartyl aminopeptidase                     | BZ | 0.965996 | 0.033382 | a |
| Aspartyl aminopeptidase                     | CZ | -0.39257 | 0.170491 | b |
| Aspartyl aminopeptidase                     | DZ | -0.76424 | 0.109688 | b |
| Aspartyl aminopeptidase                     | EZ | -0.67892 | 0.206642 | b |
| Assimilatory sulfite reductase (NADPH)      | AZ | -0.9485  | 0.13672  | b |
| Assimilatory sulfite reductase (NADPH)      | BZ | -0.9462  | 0.1422   | b |
| Assimilatory sulfite reductase (NADPH)      | CZ | 0.691779 | 0.119674 | a |

|                                                                       |    |          |          |    |
|-----------------------------------------------------------------------|----|----------|----------|----|
| Assimilatory sulfite reductase (NADPH)                                | DZ | 0.748346 | 0.055699 | a  |
| Assimilatory sulfite reductase (NADPH)                                | EZ | 0.454571 | 0.177919 | a  |
| ATP adenyltransferase                                                 | AZ | 0.783189 | 0.106613 | a  |
| ATP adenyltransferase                                                 | BZ | 0.928594 | 0.043412 | a  |
| ATP adenyltransferase                                                 | CZ | -0.17708 | 0.187515 | b  |
| ATP adenyltransferase                                                 | DZ | -1.04292 | 0.118964 | b  |
| ATP adenyltransferase                                                 | EZ | -0.49179 | 0.188697 | b  |
| ATP phosphoribosyltransferase                                         | AZ | 0.866892 | 0.103202 | a  |
| ATP phosphoribosyltransferase                                         | BZ | 0.962998 | 0.033377 | a  |
| ATP phosphoribosyltransferase                                         | CZ | -0.38329 | 0.172762 | b  |
| ATP phosphoribosyltransferase                                         | DZ | -0.76585 | 0.109444 | b  |
| ATP phosphoribosyltransferase                                         | EZ | -0.68075 | 0.206457 | b  |
| ATP-dependent NAD(P)H-hydrate dehydratase                             | AZ | -0.89015 | 0.116878 | b  |
| ATP-dependent NAD(P)H-hydrate dehydratase                             | BZ | -0.97146 | 0.155143 | b  |
| ATP-dependent NAD(P)H-hydrate dehydratase                             | CZ | 0.64138  | 0.1246   | a  |
| ATP-dependent NAD(P)H-hydrate dehydratase                             | DZ | 0.692759 | 0.082785 | a  |
| ATP-dependent NAD(P)H-hydrate dehydratase                             | EZ | 0.527478 | 0.186038 | a  |
| Benzaldehyde dehydrogenase (NAD(+))                                   | AZ | -0.93908 | 0.158005 | b  |
| Benzaldehyde dehydrogenase (NAD(+))                                   | BZ | -0.81562 | 0.102027 | b  |
| Benzaldehyde dehydrogenase (NAD(+))                                   | CZ | 0.479992 | 0.116097 | a  |
| Benzaldehyde dehydrogenase (NAD(+))                                   | DZ | 0.830058 | 0.055987 | a  |
| Benzaldehyde dehydrogenase (NAD(+))                                   | EZ | 0.444651 | 0.234097 | a  |
| Benzene 1,2-dioxygenase                                               | AZ | -1.02366 | 0.154132 | c  |
| Benzene 1,2-dioxygenase                                               | BZ | -0.59447 | 0.126501 | bc |
| Benzene 1,2-dioxygenase                                               | CZ | 0.586184 | 0.193128 | a  |
| Benzene 1,2-dioxygenase                                               | DZ | 0.714372 | 0.047211 | a  |
| Benzene 1,2-dioxygenase                                               | EZ | 0.317569 | 0.207149 | ab |
| Benzoate 4-monoxygenase                                               | AZ | -0.91826 | 0.114315 | b  |
| Benzoate 4-monoxygenase                                               | BZ | -0.94875 | 0.155933 | b  |
| Benzoate 4-monoxygenase                                               | CZ | 0.663864 | 0.113568 | a  |
| Benzoate 4-monoxygenase                                               | DZ | 0.641874 | 0.079349 | a  |
| Benzoate 4-monoxygenase                                               | EZ | 0.561275 | 0.194599 | a  |
| Beta-1,4-mannosyl-glycoprotein 4-beta-N-acetylglucosaminyltransferase | AZ | -0.80984 | 0.223631 | b  |
| Beta-1,4-mannosyl-glycoprotein 4-beta-N-acetylglucosaminyltransferase | BZ | -0.67046 | 0.122551 | b  |
| Beta-1,4-mannosyl-glycoprotein 4-beta-N-acetylglucosaminyltransferase | CZ | 0.721507 | 0.178104 | a  |
| Beta-1,4-mannosyl-glycoprotein 4-beta-N-acetylglucosaminyltransferase | DZ | 0.244861 | 0.16179  | ab |
| Beta-1,4-mannosyl-glycoprotein 4-beta-N-acetylglucosaminyltransferase | EZ | 0.513924 | 0.139906 | a  |
| Beta-fructofuranosidase                                               | AZ | -0.96576 | 0.167019 | b  |
| Beta-fructofuranosidase                                               | BZ | -0.77107 | 0.110724 | b  |
| Beta-fructofuranosidase                                               | CZ | 0.604078 | 0.126135 | a  |
| Beta-fructofuranosidase                                               | DZ | 0.753308 | 0.039894 | a  |
| Beta-fructofuranosidase                                               | EZ | 0.37944  | 0.228393 | a  |
| Beta-galactosidase                                                    | AZ | -0.94011 | 0.155754 | b  |
| Beta-galactosidase                                                    | BZ | -0.8924  | 0.091671 | b  |

|                                                 |    |          |          |   |
|-------------------------------------------------|----|----------|----------|---|
| Beta-galactosidase                              | CZ | 0.554047 | 0.101426 | a |
| Beta-galactosidase                              | DZ | 0.815657 | 0.055171 | a |
| Beta-galactosidase                              | EZ | 0.462809 | 0.225108 | a |
| Beta-glucosidase                                | AZ | -0.91833 | 0.150375 | b |
| Beta-glucosidase                                | BZ | -0.94213 | 0.071534 | b |
| Beta-glucosidase                                | CZ | 0.531486 | 0.126913 | a |
| Beta-glucosidase                                | DZ | 0.818262 | 0.059087 | a |
| Beta-glucosidase                                | EZ | 0.510715 | 0.213265 | a |
| Beta-glucuronidase                              | AZ | -0.78492 | 0.170849 | b |
| Beta-glucuronidase                              | BZ | -0.9597  | 0.111112 | b |
| Beta-glucuronidase                              | CZ | 0.582437 | 0.104676 | a |
| Beta-glucuronidase                              | DZ | 0.723002 | 0.084933 | a |
| Beta-glucuronidase                              | EZ | 0.439177 | 0.225158 | a |
| Beta-ketoacyl-[acyl-carrier-protein] synthase I | AZ | 0.853321 | 0.074439 | a |
| Beta-ketoacyl-[acyl-carrier-protein] synthase I | BZ | 0.923557 | 0.022738 | a |
| Beta-ketoacyl-[acyl-carrier-protein] synthase I | CZ | -0.65572 | 0.240464 | b |
| Beta-ketoacyl-[acyl-carrier-protein] synthase I | DZ | -0.64503 | 0.11365  | b |
| Beta-ketoacyl-[acyl-carrier-protein] synthase I | EZ | -0.47613 | 0.174672 | b |
| Beta-lactamase                                  | AZ | -0.95693 | 0.167052 | b |
| Beta-lactamase                                  | BZ | -0.77153 | 0.105531 | b |
| Beta-lactamase                                  | CZ | 0.483713 | 0.108949 | a |
| Beta-lactamase                                  | DZ | 0.778946 | 0.053787 | a |
| Beta-lactamase                                  | EZ | 0.465805 | 0.240332 | a |
| Beta-mannosidase                                | AZ | -0.94505 | 0.157612 | b |
| Beta-mannosidase                                | BZ | -0.89744 | 0.090853 | b |
| Beta-mannosidase                                | CZ | 0.540774 | 0.102915 | a |
| Beta-mannosidase                                | DZ | 0.82271  | 0.054391 | a |
| Beta-mannosidase                                | EZ | 0.479005 | 0.220209 | a |
| Beta-N-acetylhexosaminidase                     | AZ | -0.92382 | 0.03554  | b |
| Beta-N-acetylhexosaminidase                     | BZ | -0.86131 | 0.022823 | b |
| Beta-N-acetylhexosaminidase                     | CZ | 0.565215 | 0.181031 | a |
| Beta-N-acetylhexosaminidase                     | DZ | 0.747751 | 0.212259 | a |
| Beta-N-acetylhexosaminidase                     | EZ | 0.472166 | 0.159837 | a |
| Beta-ureidopropionase                           | AZ | -0.96699 | 0.159129 | b |
| Beta-ureidopropionase                           | BZ | -0.78669 | 0.106432 | b |
| Beta-ureidopropionase                           | CZ | 0.516784 | 0.114063 | a |
| Beta-ureidopropionase                           | DZ | 0.754331 | 0.048544 | a |
| Beta-ureidopropionase                           | EZ | 0.482558 | 0.23841  | a |
| Betaine-aldehyde dehydrogenase                  | AZ | -0.88799 | 0.142415 | b |
| Betaine-aldehyde dehydrogenase                  | BZ | -0.99847 | 0.108184 | b |
| Betaine-aldehyde dehydrogenase                  | CZ | 0.600539 | 0.062606 | a |
| Betaine-aldehyde dehydrogenase                  | DZ | 0.885966 | 0.096509 | a |
| Betaine-aldehyde dehydrogenase                  | EZ | 0.399955 | 0.200574 | a |
| Biotin synthase                                 | AZ | 0.860426 | 0.108912 | a |

|                                                   |    |          |          |    |
|---------------------------------------------------|----|----------|----------|----|
| Biotin synthase                                   | BZ | 0.960778 | 0.035623 | a  |
| Biotin synthase                                   | CZ | -0.42304 | 0.181638 | b  |
| Biotin synthase                                   | DZ | -0.81998 | 0.111067 | b  |
| Biotin synthase                                   | EZ | -0.57818 | 0.197707 | b  |
| Bis(5'-adenosyl)-triphosphatase                   | AZ | 0.803174 | 0.086188 | a  |
| Bis(5'-adenosyl)-triphosphatase                   | BZ | 0.900475 | 0.024597 | a  |
| Bis(5'-adenosyl)-triphosphatase                   | CZ | -0.17396 | 0.149048 | b  |
| Bis(5'-adenosyl)-triphosphatase                   | DZ | -0.65147 | 0.145705 | b  |
| Bis(5'-adenosyl)-triphosphatase                   | EZ | -0.87822 | 0.233295 | b  |
| Bis(5'-nucleosyl)-tetraphosphatase (asymmetrical) | AZ | -0.91495 | 0.116605 | b  |
| Bis(5'-nucleosyl)-tetraphosphatase (asymmetrical) | BZ | -0.96731 | 0.042308 | b  |
| Bis(5'-nucleosyl)-tetraphosphatase (asymmetrical) | CZ | 0.36357  | 0.161124 | a  |
| Bis(5'-nucleosyl)-tetraphosphatase (asymmetrical) | DZ | 0.978369 | 0.051947 | a  |
| Bis(5'-nucleosyl)-tetraphosphatase (asymmetrical) | EZ | 0.540323 | 0.195565 | a  |
| Bis(5'-nucleosyl)-tetraphosphatase (symmetrical)  | AZ | -1.07799 | 0.181277 | c  |
| Bis(5'-nucleosyl)-tetraphosphatase (symmetrical)  | BZ | -0.63264 | 0.096381 | bc |
| Bis(5'-nucleosyl)-tetraphosphatase (symmetrical)  | CZ | 0.516738 | 0.129993 | a  |
| Bis(5'-nucleosyl)-tetraphosphatase (symmetrical)  | DZ | 0.959188 | 0.050958 | a  |
| Bis(5'-nucleosyl)-tetraphosphatase (symmetrical)  | EZ | 0.2347   | 0.195277 | ab |
| Bleomycin hydrolase                               | AZ | -0.85367 | 0.152406 | b  |
| Bleomycin hydrolase                               | BZ | -0.98439 | 0.109468 | b  |
| Bleomycin hydrolase                               | CZ | 0.505836 | 0.107995 | a  |
| Bleomycin hydrolase                               | DZ | 0.837481 | 0.054329 | a  |
| Bleomycin hydrolase                               | EZ | 0.494751 | 0.212565 | a  |
| Branched-chain-amino-acid transaminase            | AZ | -0.85912 | 0.1255   | b  |
| Branched-chain-amino-acid transaminase            | BZ | -1.0001  | 0.048696 | b  |
| Branched-chain-amino-acid transaminase            | CZ | 0.468714 | 0.131872 | a  |
| Branched-chain-amino-acid transaminase            | DZ | 0.731775 | 0.114423 | a  |
| Branched-chain-amino-acid transaminase            | EZ | 0.658728 | 0.212193 | a  |
| Butyrate--CoA ligase                              | AZ | -1.11397 | 0.117556 | b  |
| Butyrate--CoA ligase                              | BZ | -0.64405 | 0.074623 | b  |
| Butyrate--CoA ligase                              | CZ | 1.004513 | 0.097777 | a  |
| Butyrate--CoA ligase                              | DZ | 0.311575 | 0.197385 | a  |
| Butyrate--CoA ligase                              | EZ | 0.441931 | 0.155669 | a  |
| Caffeoyl-CoA O-methyltransferase                  | AZ | -1.04818 | 0.249568 | c  |
| Caffeoyl-CoA O-methyltransferase                  | BZ | -0.45756 | 0.137129 | bc |
| Caffeoyl-CoA O-methyltransferase                  | CZ | 0.138949 | 0.064539 | ab |
| Caffeoyl-CoA O-methyltransferase                  | DZ | 1.045825 | 0.110335 | a  |
| Caffeoyl-CoA O-methyltransferase                  | EZ | 0.320966 | 0.127931 | ab |
| Calcium-transporting ATPase                       | AZ | 0.828478 | 0.110974 | a  |
| Calcium-transporting ATPase                       | BZ | 0.9698   | 0.035176 | a  |
| Calcium-transporting ATPase                       | CZ | -0.25129 | 0.147256 | b  |
| Calcium-transporting ATPase                       | DZ | -0.80646 | 0.128789 | b  |
| Calcium-transporting ATPase                       | EZ | -0.74053 | 0.209134 | b  |

|                                                      |    |          |          |    |
|------------------------------------------------------|----|----------|----------|----|
| Calmodulin-lysine N-methyltransferase                | AZ | -0.8935  | 0.092213 | b  |
| Calmodulin-lysine N-methyltransferase                | BZ | -1.12663 | 0.062809 | b  |
| Calmodulin-lysine N-methyltransferase                | CZ | 0.75014  | 0.104915 | a  |
| Calmodulin-lysine N-methyltransferase                | DZ | 0.639795 | 0.093471 | a  |
| Calmodulin-lysine N-methyltransferase                | EZ | 0.630199 | 0.189646 | a  |
| Carbamoyl-phosphate synthase (glutamine-hydrolyzing) | AZ | 0.852229 | 0.098656 | a  |
| Carbamoyl-phosphate synthase (glutamine-hydrolyzing) | BZ | 0.960514 | 0.028958 | a  |
| Carbamoyl-phosphate synthase (glutamine-hydrolyzing) | CZ | -0.27918 | 0.151455 | b  |
| Carbamoyl-phosphate synthase (glutamine-hydrolyzing) | DZ | -0.84297 | 0.13838  | b  |
| Carbamoyl-phosphate synthase (glutamine-hydrolyzing) | EZ | -0.6906  | 0.204019 | b  |
| Carbonate dehydratase                                | AZ | -0.7817  | 0.093503 | bc |
| Carbonate dehydratase                                | BZ | -0.93459 | 0.030458 | c  |
| Carbonate dehydratase                                | CZ | 0.095447 | 0.105928 | ab |
| Carbonate dehydratase                                | DZ | 0.972975 | 0.201499 | a  |
| Carbonate dehydratase                                | EZ | 0.647867 | 0.188429 | a  |
| Carbonyl reductase (NADPH)                           | AZ | -0.8701  | 0.147846 | b  |
| Carbonyl reductase (NADPH)                           | BZ | -0.93194 | 0.073231 | b  |
| Carbonyl reductase (NADPH)                           | CZ | 0.488082 | 0.149747 | a  |
| Carbonyl reductase (NADPH)                           | DZ | 0.70424  | 0.066614 | a  |
| Carbonyl reductase (NADPH)                           | EZ | 0.609717 | 0.222129 | a  |
| Carboxylesterase                                     | AZ | -0.86904 | 0.151543 | b  |
| Carboxylesterase                                     | BZ | -0.94298 | 0.067977 | b  |
| Carboxylesterase                                     | CZ | 0.451024 | 0.152925 | a  |
| Carboxylesterase                                     | DZ | 0.758872 | 0.041708 | a  |
| Carboxylesterase                                     | EZ | 0.602123 | 0.219028 | a  |
| Carboxymethylenebutenolidase                         | AZ | -0.90879 | 0.142338 | b  |
| Carboxymethylenebutenolidase                         | BZ | -0.97737 | 0.121746 | b  |
| Carboxymethylenebutenolidase                         | CZ | 0.624968 | 0.090061 | a  |
| Carboxymethylenebutenolidase                         | DZ | 0.735784 | 0.058956 | a  |
| Carboxymethylenebutenolidase                         | EZ | 0.525408 | 0.209458 | a  |
| Carboxypeptidase A                                   | AZ | -0.70838 | 0.122722 | b  |
| Carboxypeptidase A                                   | BZ | -0.67116 | 0.04083  | b  |
| Carboxypeptidase A                                   | CZ | 0.480617 | 0.14755  | ab |
| Carboxypeptidase A                                   | DZ | 0.751281 | 0.162456 | a  |
| Carboxypeptidase A                                   | EZ | 0.147644 | 0.294339 | ab |
| Carboxypeptidase C                                   | AZ | -0.83401 | 0.142075 | b  |
| Carboxypeptidase C                                   | BZ | -0.97917 | 0.045413 | b  |
| Carboxypeptidase C                                   | CZ | 0.400749 | 0.136375 | a  |
| Carboxypeptidase C                                   | DZ | 0.795375 | 0.124936 | a  |
| Carboxypeptidase C                                   | EZ | 0.61706  | 0.205252 | a  |
| Carboxypeptidase D                                   | AZ | -0.71676 | 0.088688 | bc |
| Carboxypeptidase D                                   | BZ | -0.84152 | 0.021971 | c  |
| Carboxypeptidase D                                   | CZ | 0.323376 | 0.195313 | ab |
| Carboxypeptidase D                                   | DZ | 0.730483 | 0.236963 | a  |



|                                                                    |    |          |          |    |
|--------------------------------------------------------------------|----|----------|----------|----|
| Carboxypeptidase D                                                 | EZ | 0.504424 | 0.177839 | a  |
| Carnitine O-acetyltransferase                                      | AZ | 0.865964 | 0.086221 | a  |
| Carnitine O-acetyltransferase                                      | BZ | 0.965725 | 0.025132 | a  |
| Carnitine O-acetyltransferase                                      | CZ | -0.32979 | 0.158751 | b  |
| Carnitine O-acetyltransferase                                      | DZ | -0.73239 | 0.129987 | b  |
| Carnitine O-acetyltransferase                                      | EZ | -0.76951 | 0.209391 | b  |
| Carnosine synthase                                                 | AZ | -0.61321 | 0.058247 | b  |
| Carnosine synthase                                                 | BZ | -0.80309 | 0.083048 | b  |
| Carnosine synthase                                                 | CZ | 0.582324 | 0.021245 | a  |
| Carnosine synthase                                                 | DZ | -0.06382 | 0.306636 | ab |
| Carnosine synthase                                                 | EZ | 0.897801 | 0.163471 | a  |
| Catalase                                                           | AZ | -0.89071 | 0.155718 | b  |
| Catalase                                                           | BZ | -0.93413 | 0.102186 | b  |
| Catalase                                                           | CZ | 0.559919 | 0.101042 | a  |
| Catalase                                                           | DZ | 0.7776   | 0.063099 | a  |
| Catalase                                                           | EZ | 0.487328 | 0.22369  | a  |
| Catechol 1,2-dioxygenase                                           | AZ | -0.93214 | 0.116503 | b  |
| Catechol 1,2-dioxygenase                                           | BZ | -0.94433 | 0.158955 | b  |
| Catechol 1,2-dioxygenase                                           | CZ | 0.661205 | 0.110203 | a  |
| Catechol 1,2-dioxygenase                                           | DZ | 0.617262 | 0.068915 | a  |
| Catechol 1,2-dioxygenase                                           | EZ | 0.597995 | 0.193507 | a  |
| Catechol O-methyltransferase                                       | AZ | -0.92601 | 0.162823 | b  |
| Catechol O-methyltransferase                                       | BZ | -0.83901 | 0.105833 | b  |
| Catechol O-methyltransferase                                       | CZ | 0.552196 | 0.106975 | a  |
| Catechol O-methyltransferase                                       | DZ | 0.747248 | 0.064266 | a  |
| Catechol O-methyltransferase                                       | EZ | 0.465579 | 0.23375  | a  |
| CDP-diacylglycerol--glycerol-3-phosphate 3-phosphatidyltransferase | AZ | 0.866802 | 0.103111 | a  |
| CDP-diacylglycerol--glycerol-3-phosphate 3-phosphatidyltransferase | BZ | 0.962972 | 0.033353 | a  |
| CDP-diacylglycerol--glycerol-3-phosphate 3-phosphatidyltransferase | CZ | -0.38555 | 0.173323 | b  |
| CDP-diacylglycerol--glycerol-3-phosphate 3-phosphatidyltransferase | DZ | -0.76463 | 0.109365 | b  |
| CDP-diacylglycerol--glycerol-3-phosphate 3-phosphatidyltransferase | EZ | -0.67959 | 0.206309 | b  |
| CDP-diacylglycerol--inositol 3-phosphatidyltransferase             | AZ | 0.739046 | 0.106773 | a  |
| CDP-diacylglycerol--inositol 3-phosphatidyltransferase             | BZ | 0.992872 | 0.036205 | a  |
| CDP-diacylglycerol--inositol 3-phosphatidyltransferase             | CZ | -0.37641 | 0.17688  | b  |
| CDP-diacylglycerol--inositol 3-phosphatidyltransferase             | DZ | -0.61917 | 0.158382 | b  |
| CDP-diacylglycerol--inositol 3-phosphatidyltransferase             | EZ | -0.73633 | 0.202376 | b  |
| CDP-diacylglycerol--serine O-phosphatidyltransferase               | AZ | 0.88905  | 0.089029 | a  |
| CDP-diacylglycerol--serine O-phosphatidyltransferase               | BZ | 0.916993 | 0.03903  | a  |
| CDP-diacylglycerol--serine O-phosphatidyltransferase               | CZ | -0.4202  | 0.202394 | b  |
| CDP-diacylglycerol--serine O-phosphatidyltransferase               | DZ | -0.73718 | 0.088022 | b  |
| CDP-diacylglycerol--serine O-phosphatidyltransferase               | EZ | -0.64867 | 0.207935 | b  |
| Cellobiose dehydrogenase (acceptor)                                | AZ | -0.88929 | 0.095777 | b  |
| Cellobiose dehydrogenase (acceptor)                                | BZ | -1.11157 | 0.081557 | b  |
| Cellobiose dehydrogenase (acceptor)                                | CZ | 0.690808 | 0.106336 | a  |

|                                                       |    |          |          |    |
|-------------------------------------------------------|----|----------|----------|----|
| Cellobiose dehydrogenase (acceptor)                   | DZ | 0.696123 | 0.084104 | a  |
| Cellobiose dehydrogenase (acceptor)                   | EZ | 0.613933 | 0.193745 | a  |
| Cellulase                                             | AZ | -0.93911 | 0.120853 | b  |
| Cellulase                                             | BZ | -1.05544 | 0.089299 | b  |
| Cellulase                                             | CZ | 0.784967 | 0.105201 | a  |
| Cellulase                                             | DZ | 0.688178 | 0.061458 | a  |
| Cellulase                                             | EZ | 0.52141  | 0.186279 | a  |
| Cellulose 1,4-beta-cellobiosidase (non-reducing end)  | AZ | -0.87495 | 0.090831 | b  |
| Cellulose 1,4-beta-cellobiosidase (non-reducing end)  | BZ | -1.14858 | 0.05772  | b  |
| Cellulose 1,4-beta-cellobiosidase (non-reducing end)  | CZ | 0.750689 | 0.108659 | a  |
| Cellulose 1,4-beta-cellobiosidase (non-reducing end)  | DZ | 0.651431 | 0.096985 | a  |
| Cellulose 1,4-beta-cellobiosidase (non-reducing end)  | EZ | 0.621407 | 0.185107 | a  |
| Ceramidase                                            | AZ | -0.96926 | 0.119314 | b  |
| Ceramidase                                            | BZ | -0.97287 | 0.11533  | b  |
| Ceramidase                                            | CZ | 0.748673 | 0.073552 | a  |
| Ceramidase                                            | DZ | 0.739517 | 0.066878 | a  |
| Ceramidase                                            | EZ | 0.453943 | 0.206423 | a  |
| Ceramide glucosyltransferase                          | AZ | 0.878944 | 0.103435 | a  |
| Ceramide glucosyltransferase                          | BZ | 0.939538 | 0.040334 | a  |
| Ceramide glucosyltransferase                          | CZ | -0.37409 | 0.173512 | b  |
| Ceramide glucosyltransferase                          | DZ | -0.75433 | 0.109319 | b  |
| Ceramide glucosyltransferase                          | EZ | -0.69006 | 0.208798 | b  |
| Cerebroside-sulfatase                                 | AZ | -1.03319 | 0.179349 | b  |
| Cerebroside-sulfatase                                 | BZ | -0.46486 | 0.148758 | ab |
| Cerebroside-sulfatase                                 | CZ | 0.68236  | 0.189009 | a  |
| Cerebroside-sulfatase                                 | DZ | 0.595744 | 0.088917 | a  |
| Cerebroside-sulfatase                                 | EZ | 0.219952 | 0.185607 | a  |
| Cerevisin                                             | AZ | 0.873493 | 0.07841  | a  |
| Cerevisin                                             | BZ | 0.879958 | 0.038404 | a  |
| Cerevisin                                             | CZ | -0.47995 | 0.221295 | b  |
| Cerevisin                                             | DZ | -0.62319 | 0.115737 | b  |
| Cerevisin                                             | EZ | -0.65031 | 0.202642 | b  |
| Chitin deacetylase                                    | AZ | 0.834391 | 0.089542 | ab |
| Chitin deacetylase                                    | BZ | 0.916393 | 0.029315 | a  |
| Chitin deacetylase                                    | CZ | -0.04244 | 0.120766 | bc |
| Chitin deacetylase                                    | DZ | -0.92871 | 0.148047 | c  |
| Chitin deacetylase                                    | EZ | -0.77963 | 0.210273 | c  |
| Chitin synthase                                       | AZ | 0.872745 | 0.08873  | a  |
| Chitin synthase                                       | BZ | 0.966543 | 0.026637 | a  |
| Chitin synthase                                       | CZ | -0.3157  | 0.155651 | b  |
| Chitin synthase                                       | DZ | -0.77076 | 0.125815 | b  |
| Chitin synthase                                       | EZ | -0.75282 | 0.208667 | b  |
| Chitobiosyldiphosphodolichol beta-mannosyltransferase | AZ | 0.867146 | 0.103132 | a  |
| Chitobiosyldiphosphodolichol beta-mannosyltransferase | BZ | 0.96246  | 0.033215 | a  |

|                                                       |    |          |          |   |
|-------------------------------------------------------|----|----------|----------|---|
| Chitobiosyldiphosphodolichol beta-mannosyltransferase | CZ | -0.38545 | 0.173357 | b |
| Chitobiosyldiphosphodolichol beta-mannosyltransferase | DZ | -0.7646  | 0.109387 | b |
| Chitobiosyldiphosphodolichol beta-mannosyltransferase | EZ | -0.67955 | 0.206349 | b |
| Chitosanase                                           | AZ | -0.92726 | 0.087697 | b |
| Chitosanase                                           | BZ | -1.1131  | 0.069157 | b |
| Chitosanase                                           | CZ | 0.739852 | 0.089107 | a |
| Chitosanase                                           | DZ | 0.60104  | 0.080841 | a |
| Chitosanase                                           | EZ | 0.699463 | 0.195494 | a |
| Cholestenol Delta-isomerase                           | AZ | -0.88439 | 0.087917 | b |
| Cholestenol Delta-isomerase                           | BZ | -0.97469 | 0.038674 | b |
| Cholestenol Delta-isomerase                           | CZ | 0.495604 | 0.152184 | a |
| Cholestenol Delta-isomerase                           | DZ | 0.643914 | 0.128197 | a |
| Cholestenol Delta-isomerase                           | EZ | 0.719553 | 0.213712 | a |
| Cholesterol 7-alpha-monooxygenase                     | AZ | -1.02054 | 0.14795  | b |
| Cholesterol 7-alpha-monooxygenase                     | BZ | -0.83223 | 0.120198 | b |
| Cholesterol 7-alpha-monooxygenase                     | CZ | 0.606055 | 0.082194 | a |
| Cholesterol 7-alpha-monooxygenase                     | DZ | 0.703955 | 0.086681 | a |
| Cholesterol 7-alpha-monooxygenase                     | EZ | 0.54276  | 0.211698 | a |
| Cholesterol oxidase                                   | AZ | -0.89549 | 0.159783 | b |
| Cholesterol oxidase                                   | BZ | -0.88846 | 0.09424  | b |
| Cholesterol oxidase                                   | CZ | 0.492881 | 0.09437  | a |
| Cholesterol oxidase                                   | DZ | 0.811684 | 0.080128 | a |
| Cholesterol oxidase                                   | EZ | 0.479384 | 0.232638 | a |
| Choline dehydrogenase                                 | AZ | -0.94408 | 0.162731 | b |
| Choline dehydrogenase                                 | BZ | -0.89216 | 0.089786 | b |
| Choline dehydrogenase                                 | CZ | 0.5176   | 0.102129 | a |
| Choline dehydrogenase                                 | DZ | 0.865357 | 0.042888 | a |
| Choline dehydrogenase                                 | EZ | 0.453281 | 0.218437 | a |
| Choline kinase                                        | AZ | -0.91248 | 0.15591  | b |
| Choline kinase                                        | BZ | -0.91034 | 0.096844 | b |
| Choline kinase                                        | CZ | 0.532948 | 0.099417 | a |
| Choline kinase                                        | DZ | 0.813646 | 0.063027 | a |
| Choline kinase                                        | EZ | 0.476229 | 0.225272 | a |
| Choline-phosphate cytidylyltransferase                | AZ | 0.93056  | 0.095447 | a |
| Choline-phosphate cytidylyltransferase                | BZ | 0.909451 | 0.059675 | a |
| Choline-phosphate cytidylyltransferase                | CZ | -0.46484 | 0.199895 | b |
| Choline-phosphate cytidylyltransferase                | DZ | -0.82806 | 0.066387 | b |
| Choline-phosphate cytidylyltransferase                | EZ | -0.54711 | 0.195594 | b |
| Choline-sulfatase                                     | AZ | -0.91645 | 0.118267 | b |
| Choline-sulfatase                                     | BZ | -0.9706  | 0.144903 | b |
| Choline-sulfatase                                     | CZ | 0.629655 | 0.111699 | a |
| Choline-sulfatase                                     | DZ | 0.674037 | 0.077536 | a |
| Choline-sulfatase                                     | EZ | 0.583354 | 0.194618 | a |
| Cholinesterase                                        | AZ | -0.87033 | 0.15858  | b |

|                                                   |    |          |          |    |
|---------------------------------------------------|----|----------|----------|----|
| Cholinesterase                                    | BZ | -0.91225 | 0.102927 | b  |
| Cholinesterase                                    | CZ | 0.565005 | 0.109256 | a  |
| Cholinesterase                                    | DZ | 0.75008  | 0.06576  | a  |
| Cholinesterase                                    | EZ | 0.467494 | 0.231287 | a  |
| Chorismate mutase                                 | AZ | 0.866703 | 0.10302  | a  |
| Chorismate mutase                                 | BZ | 0.962936 | 0.033329 | a  |
| Chorismate mutase                                 | CZ | -0.3878  | 0.173891 | b  |
| Chorismate mutase                                 | DZ | -0.76341 | 0.109285 | b  |
| Chorismate mutase                                 | EZ | -0.67843 | 0.206158 | b  |
| Cinnamoyl-CoA reductase                           | AZ | -0.56855 | 0.054568 | bc |
| Cinnamoyl-CoA reductase                           | BZ | -0.98743 | 0.147652 | c  |
| Cinnamoyl-CoA reductase                           | CZ | 0.558435 | 0.029317 | a  |
| Cinnamoyl-CoA reductase                           | DZ | 0.079358 | 0.257277 | ab |
| Cinnamoyl-CoA reductase                           | EZ | 0.918183 | 0.158736 | a  |
| Cinnamyl-alcohol dehydrogenase                    | AZ | -0.94376 | 0.155571 | b  |
| Cinnamyl-alcohol dehydrogenase                    | BZ | -0.85215 | 0.101507 | b  |
| Cinnamyl-alcohol dehydrogenase                    | CZ | 0.520724 | 0.125177 | a  |
| Cinnamyl-alcohol dehydrogenase                    | DZ | 0.818214 | 0.034028 | a  |
| Cinnamyl-alcohol dehydrogenase                    | EZ | 0.456964 | 0.224395 | a  |
| Citrate (Si)-synthase                             | AZ | 0.217412 | 0.090619 | a  |
| Citrate (Si)-synthase                             | BZ | 0.449131 | 0.07415  | a  |
| Citrate (Si)-synthase                             | CZ | -0.30174 | 0.150367 | ab |
| Citrate (Si)-synthase                             | DZ | 0.739167 | 0.168119 | a  |
| Citrate (Si)-synthase                             | EZ | -1.10397 | 0.264874 | b  |
| Cob(I)yrinic acid a,c-diamide adenosyltransferase | AZ | 0.835083 | 0.040204 | a  |
| Cob(I)yrinic acid a,c-diamide adenosyltransferase | BZ | 0.883621 | 0.010458 | a  |
| Cob(I)yrinic acid a,c-diamide adenosyltransferase | CZ | -0.14654 | 0.161629 | b  |
| Cob(I)yrinic acid a,c-diamide adenosyltransferase | DZ | -0.73186 | 0.183458 | b  |
| Cob(I)yrinic acid a,c-diamide adenosyltransferase | EZ | -0.8403  | 0.203534 | b  |
| Coproporphyrinogen oxidase                        | AZ | 0.880109 | 0.086397 | a  |
| Coproporphyrinogen oxidase                        | BZ | 0.947023 | 0.035047 | a  |
| Coproporphyrinogen oxidase                        | CZ | -0.49326 | 0.185339 | b  |
| Coproporphyrinogen oxidase                        | DZ | -0.52518 | 0.079381 | b  |
| Coproporphyrinogen oxidase                        | EZ | -0.80869 | 0.220064 | b  |
| CTP synthase (glutamine hydrolyzing)              | AZ | 0.816514 | 0.113618 | a  |
| CTP synthase (glutamine hydrolyzing)              | BZ | 0.921202 | 0.037162 | a  |
| CTP synthase (glutamine hydrolyzing)              | CZ | -0.16432 | 0.177174 | b  |
| CTP synthase (glutamine hydrolyzing)              | DZ | -0.91483 | 0.113615 | b  |
| CTP synthase (glutamine hydrolyzing)              | EZ | -0.65857 | 0.201901 | b  |
| Cutinase                                          | AZ | -0.89306 | 0.079973 | b  |
| Cutinase                                          | BZ | -1.12633 | 0.080446 | b  |
| Cutinase                                          | CZ | 0.721755 | 0.103592 | a  |
| Cutinase                                          | DZ | 0.653864 | 0.080481 | a  |
| Cutinase                                          | EZ | 0.643763 | 0.19614  | a  |

|                                               |    |          |          |    |
|-----------------------------------------------|----|----------|----------|----|
| Cyanide hydratase                             | AZ | -0.90039 | 0.084789 | b  |
| Cyanide hydratase                             | BZ | -1.14336 | 0.063779 | b  |
| Cyanide hydratase                             | CZ | 0.722926 | 0.096902 | a  |
| Cyanide hydratase                             | DZ | 0.622192 | 0.085317 | a  |
| Cyanide hydratase                             | EZ | 0.698638 | 0.19048  | a  |
| Cyclohexanone monooxygenase                   | AZ | -0.89967 | 0.161034 | b  |
| Cyclohexanone monooxygenase                   | BZ | -0.92166 | 0.098523 | b  |
| Cyclohexanone monooxygenase                   | CZ | 0.619735 | 0.102768 | a  |
| Cyclohexanone monooxygenase                   | DZ | 0.728019 | 0.064119 | a  |
| Cyclohexanone monooxygenase                   | EZ | 0.473579 | 0.22322  | a  |
| Cyclopropane-fatty-acyl-phospholipid synthase | AZ | 0.858167 | 0.0778   | a  |
| Cyclopropane-fatty-acyl-phospholipid synthase | BZ | 0.804272 | 0.050932 | a  |
| Cyclopropane-fatty-acyl-phospholipid synthase | CZ | -0.47257 | 0.181795 | b  |
| Cyclopropane-fatty-acyl-phospholipid synthase | DZ | -0.43083 | 0.191204 | b  |
| Cyclopropane-fatty-acyl-phospholipid synthase | EZ | -0.75904 | 0.208148 | b  |
| Cystathionine beta-lyase                      | AZ | 0.696846 | 0.086473 | a  |
| Cystathionine beta-lyase                      | BZ | 0.804433 | 0.020012 | a  |
| Cystathionine beta-lyase                      | CZ | -0.5978  | 0.323419 | b  |
| Cystathionine beta-lyase                      | DZ | -0.63268 | 0.098814 | b  |
| Cystathionine beta-lyase                      | EZ | -0.2708  | 0.139907 | ab |
| Cystathionine beta-synthase                   | AZ | 0.873658 | 0.088349 | a  |
| Cystathionine beta-synthase                   | BZ | 0.966711 | 0.025594 | a  |
| Cystathionine beta-synthase                   | CZ | -0.32623 | 0.161801 | b  |
| Cystathionine beta-synthase                   | DZ | -0.78466 | 0.125411 | b  |
| Cystathionine beta-synthase                   | EZ | -0.72948 | 0.205009 | b  |
| Cystathionine gamma-lyase                     | AZ | 0.742417 | 0.098498 | a  |
| Cystathionine gamma-lyase                     | BZ | 0.98223  | 0.032115 | a  |
| Cystathionine gamma-lyase                     | CZ | -0.31907 | 0.168159 | b  |
| Cystathionine gamma-lyase                     | DZ | -0.63508 | 0.16951  | b  |
| Cystathionine gamma-lyase                     | EZ | -0.7705  | 0.203759 | b  |
| Cysteine--tRNA ligase                         | AZ | 0.743752 | 0.09879  | a  |
| Cysteine--tRNA ligase                         | BZ | 0.982104 | 0.032525 | a  |
| Cysteine--tRNA ligase                         | CZ | -0.31201 | 0.168066 | b  |
| Cysteine--tRNA ligase                         | DZ | -0.64823 | 0.170728 | b  |
| Cysteine--tRNA ligase                         | EZ | -0.76561 | 0.201787 | b  |
| Cytidine deaminase                            | AZ | 0.713748 | 0.108714 | a  |
| Cytidine deaminase                            | BZ | 0.974077 | 0.035077 | a  |
| Cytidine deaminase                            | CZ | -0.42833 | 0.183618 | b  |
| Cytidine deaminase                            | DZ | -0.6972  | 0.191323 | b  |
| Cytidine deaminase                            | EZ | -0.56229 | 0.185556 | b  |
| Cytochrome-c oxidase                          | AZ | 0.873297 | 0.087413 | a  |
| Cytochrome-c oxidase                          | BZ | 0.954915 | 0.026801 | a  |
| Cytochrome-c oxidase                          | CZ | -0.4945  | 0.190394 | b  |
| Cytochrome-c oxidase                          | DZ | -0.67086 | 0.11716  | b  |

|                                      |    |          |          |   |
|--------------------------------------|----|----------|----------|---|
| Cytochrome-c oxidase                 | EZ | -0.66285 | 0.203079 | b |
| Cytochrome-c peroxidase              | AZ | 0.831567 | 0.084125 | a |
| Cytochrome-c peroxidase              | BZ | 0.953658 | 0.025063 | a |
| Cytochrome-c peroxidase              | CZ | -0.19722 | 0.14718  | b |
| Cytochrome-c peroxidase              | DZ | -0.96226 | 0.165811 | b |
| Cytochrome-c peroxidase              | EZ | -0.62575 | 0.187807 | b |
| Cytosine deaminase                   | AZ | 0.687586 | 0.086645 | a |
| Cytosine deaminase                   | BZ | 0.890953 | 0.017799 | a |
| Cytosine deaminase                   | CZ | -0.55942 | 0.254785 | b |
| Cytosine deaminase                   | DZ | -0.47207 | 0.178363 | b |
| Cytosine deaminase                   | EZ | -0.54705 | 0.174257 | b |
| D-amino-acid oxidase                 | AZ | -0.92004 | 0.094401 | b |
| D-amino-acid oxidase                 | BZ | -1.06094 | 0.100953 | b |
| D-amino-acid oxidase                 | CZ | 0.683861 | 0.106409 | a |
| D-amino-acid oxidase                 | DZ | 0.67866  | 0.082884 | a |
| D-amino-acid oxidase                 | EZ | 0.618459 | 0.196377 | a |
| D-arabinono-1,4-lactone oxidase      | AZ | -0.93387 | 0.12289  | b |
| D-arabinono-1,4-lactone oxidase      | BZ | -0.88461 | 0.178934 | b |
| D-arabinono-1,4-lactone oxidase      | CZ | 0.622037 | 0.115551 | a |
| D-arabinono-1,4-lactone oxidase      | DZ | 0.66427  | 0.075051 | a |
| D-arabinono-1,4-lactone oxidase      | EZ | 0.53218  | 0.188661 | a |
| D-arabinose 1-dehydrogenase (NAD(+)) | AZ | -0.90841 | 0.123826 | b |
| D-arabinose 1-dehydrogenase (NAD(+)) | BZ | -0.94353 | 0.150452 | b |
| D-arabinose 1-dehydrogenase (NAD(+)) | CZ | 0.638575 | 0.123957 | a |
| D-arabinose 1-dehydrogenase (NAD(+)) | DZ | 0.709598 | 0.079418 | a |
| D-arabinose 1-dehydrogenase (NAD(+)) | EZ | 0.503772 | 0.190606 | a |
| D-aspartate oxidase                  | AZ | -0.84023 | 0.120951 | b |
| D-aspartate oxidase                  | BZ | -0.92817 | 0.047503 | b |
| D-aspartate oxidase                  | CZ | 0.434708 | 0.206741 | a |
| D-aspartate oxidase                  | DZ | 0.854441 | 0.087746 | a |
| D-aspartate oxidase                  | EZ | 0.479252 | 0.191996 | a |
| D-lactate dehydrogenase              | AZ | -0.99278 | 0.146119 | b |
| D-lactate dehydrogenase              | BZ | -0.85781 | 0.078079 | b |
| D-lactate dehydrogenase              | CZ | 0.549636 | 0.096037 | a |
| D-lactate dehydrogenase              | DZ | 0.88534  | 0.068949 | a |
| D-lactate dehydrogenase              | EZ | 0.415616 | 0.222643 | a |
| D-lactate dehydrogenase (cytochrome) | AZ | -0.9378  | 0.150298 | b |
| D-lactate dehydrogenase (cytochrome) | BZ | -0.94063 | 0.09748  | b |
| D-lactate dehydrogenase (cytochrome) | CZ | 0.657035 | 0.100277 | a |
| D-lactate dehydrogenase (cytochrome) | DZ | 0.779019 | 0.061728 | a |
| D-lactate dehydrogenase (cytochrome) | EZ | 0.44237  | 0.210041 | a |
| D-ribulokinase                       | AZ | -0.93462 | 0.157391 | b |
| D-ribulokinase                       | BZ | -0.89926 | 0.10283  | b |
| D-ribulokinase                       | CZ | 0.565438 | 0.103747 | a |

|                                    |    |          |          |   |
|------------------------------------|----|----------|----------|---|
| D-ribulokinase                     | DZ | 0.790598 | 0.055103 | a |
| D-ribulokinase                     | EZ | 0.477848 | 0.219293 | a |
| D-stereospecific aminopeptidase    | AZ | -0.9166  | 0.175526 | b |
| D-stereospecific aminopeptidase    | BZ | -0.83568 | 0.103661 | b |
| D-stereospecific aminopeptidase    | CZ | 0.56724  | 0.108736 | a |
| D-stereospecific aminopeptidase    | DZ | 0.711244 | 0.068499 | a |
| D-stereospecific aminopeptidase    | EZ | 0.473795 | 0.228907 | a |
| D-xylose 1-dehydrogenase (NADP(+)) | AZ | -0.92589 | 0.163536 | b |
| D-xylose 1-dehydrogenase (NADP(+)) | BZ | -0.87969 | 0.092501 | b |
| D-xylose 1-dehydrogenase (NADP(+)) | CZ | 0.442281 | 0.098137 | a |
| D-xylose 1-dehydrogenase (NADP(+)) | DZ | 0.868375 | 0.048791 | a |
| D-xylose 1-dehydrogenase (NADP(+)) | EZ | 0.494924 | 0.226716 | a |
| D-xylulose reductase               | AZ | -0.62131 | 0.162597 | b |
| D-xylulose reductase               | BZ | -0.98693 | 0.176339 | b |
| D-xylulose reductase               | CZ | 0.535891 | 0.127282 | a |
| D-xylulose reductase               | DZ | 0.552035 | 0.093545 | a |
| D-xylulose reductase               | EZ | 0.520311 | 0.215361 | a |
| dCMP deaminase                     | AZ | 0.865906 | 0.10123  | a |
| dCMP deaminase                     | BZ | 0.96052  | 0.032751 | a |
| dCMP deaminase                     | CZ | -0.3651  | 0.170496 | b |
| dCMP deaminase                     | DZ | -0.75641 | 0.111295 | b |
| dCMP deaminase                     | EZ | -0.70491 | 0.208535 | b |
| Deoxyhypusine monooxygenase        | AZ | -0.90841 | 0.123829 | b |
| Deoxyhypusine monooxygenase        | BZ | -0.94353 | 0.150456 | b |
| Deoxyhypusine monooxygenase        | CZ | 0.638615 | 0.12396  | a |
| Deoxyhypusine monooxygenase        | DZ | 0.709639 | 0.07942  | a |
| Deoxyhypusine monooxygenase        | EZ | 0.50368  | 0.190599 | a |
| Deoxyribodipyrimidine photo-lyase  | AZ | -0.83818 | 0.165499 | b |
| Deoxyribodipyrimidine photo-lyase  | BZ | -0.93859 | 0.11621  | b |
| Deoxyribodipyrimidine photo-lyase  | CZ | 0.594367 | 0.112502 | a |
| Deoxyribodipyrimidine photo-lyase  | DZ | 0.724439 | 0.056826 | a |
| Deoxyribodipyrimidine photo-lyase  | EZ | 0.45797  | 0.22283  | a |
| Deoxyribose-phosphate aldolase     | AZ | -0.97741 | 0.155763 | b |
| Deoxyribose-phosphate aldolase     | BZ | -0.83236 | 0.096358 | b |
| Deoxyribose-phosphate aldolase     | CZ | 0.537159 | 0.104918 | a |
| Deoxyribose-phosphate aldolase     | DZ | 0.785127 | 0.06005  | a |
| Deoxyribose-phosphate aldolase     | EZ | 0.48748  | 0.228695 | a |
| Dephospho-CoA kinase               | AZ | 0.824091 | 0.101715 | a |
| Dephospho-CoA kinase               | BZ | 0.931302 | 0.028927 | a |
| Dephospho-CoA kinase               | CZ | -0.58988 | 0.229794 | b |
| Dephospho-CoA kinase               | DZ | -0.58552 | 0.10611  | b |
| Dephospho-CoA kinase               | EZ | -0.57999 | 0.189924 | b |
| Diacylglycerol O-acyltransferase   | AZ | -0.87845 | 0.163223 | b |
| Diacylglycerol O-acyltransferase   | BZ | -0.87843 | 0.09759  | b |

|                                                 |    |          |          |    |
|-------------------------------------------------|----|----------|----------|----|
| Diacylglycerol O-acyltransferase                | CZ | 0.472243 | 0.094429 | a  |
| Diacylglycerol O-acyltransferase                | DZ | 0.776273 | 0.096372 | a  |
| Diacylglycerol O-acyltransferase                | EZ | 0.50836  | 0.232943 | a  |
| Diamine N-acetyltransferase                     | AZ | 0.863384 | 0.094355 | a  |
| Diamine N-acetyltransferase                     | BZ | 0.894808 | 0.043418 | a  |
| Diamine N-acetyltransferase                     | CZ | -0.08535 | 0.155745 | b  |
| Diamine N-acetyltransferase                     | DZ | -0.90812 | 0.100018 | b  |
| Diamine N-acetyltransferase                     | EZ | -0.76472 | 0.216352 | b  |
| Diaminopropionate ammonia-lyase                 | AZ | -0.72824 | 0.069858 | b  |
| Diaminopropionate ammonia-lyase                 | BZ | -0.77055 | 0.071882 | b  |
| Diaminopropionate ammonia-lyase                 | CZ | 0.617972 | 0.033574 | a  |
| Diaminopropionate ammonia-lyase                 | DZ | -0.03072 | 0.280921 | ab |
| Diaminopropionate ammonia-lyase                 | EZ | 0.911544 | 0.181706 | a  |
| Dihydrofolate reductase                         | AZ | 0.655807 | 0.132667 | a  |
| Dihydrofolate reductase                         | BZ | 0.889341 | 0.022859 | a  |
| Dihydrofolate reductase                         | CZ | -0.22307 | 0.214459 | ab |
| Dihydrofolate reductase                         | DZ | -0.82999 | 0.173291 | b  |
| Dihydrofolate reductase                         | EZ | -0.49209 | 0.189115 | b  |
| Dihydrolipoyl dehydrogenase                     | AZ | 0.815499 | 0.106689 | a  |
| Dihydrolipoyl dehydrogenase                     | BZ | 0.84664  | 0.045883 | a  |
| Dihydrolipoyl dehydrogenase                     | CZ | -0.20016 | 0.208602 | b  |
| Dihydrolipoyl dehydrogenase                     | DZ | -0.91823 | 0.107935 | b  |
| Dihydrolipoyl dehydrogenase                     | EZ | -0.54375 | 0.208115 | b  |
| Dihydrolipoyllysine-residue acetyltransferase   | AZ | 0.883488 | 0.081585 | a  |
| Dihydrolipoyllysine-residue acetyltransferase   | BZ | 0.933791 | 0.035267 | a  |
| Dihydrolipoyllysine-residue acetyltransferase   | CZ | -0.35844 | 0.186738 | b  |
| Dihydrolipoyllysine-residue acetyltransferase   | DZ | -0.8233  | 0.110406 | b  |
| Dihydrolipoyllysine-residue acetyltransferase   | EZ | -0.63554 | 0.204703 | b  |
| Dihydrolipoyllysine-residue succinyltransferase | AZ | 0.864777 | 0.102822 | a  |
| Dihydrolipoyllysine-residue succinyltransferase | BZ | 0.90651  | 0.038662 | a  |
| Dihydrolipoyllysine-residue succinyltransferase | CZ | -0.15344 | 0.169198 | b  |
| Dihydrolipoyllysine-residue succinyltransferase | DZ | -0.96345 | 0.09462  | b  |
| Dihydrolipoyllysine-residue succinyltransferase | EZ | -0.6544  | 0.207053 | b  |
| Dihydroorotase                                  | AZ | 0.866802 | 0.103111 | a  |
| Dihydroorotase                                  | BZ | 0.962972 | 0.033353 | a  |
| Dihydroorotase                                  | CZ | -0.38555 | 0.173323 | b  |
| Dihydroorotase                                  | DZ | -0.76463 | 0.109365 | b  |
| Dihydroorotase                                  | EZ | -0.67959 | 0.206309 | b  |
| Dihydropyrimidinase                             | AZ | -0.73859 | 0.163846 | b  |
| Dihydropyrimidinase                             | BZ | -0.92158 | 0.130386 | b  |
| Dihydropyrimidinase                             | CZ | 0.460932 | 0.078836 | a  |
| Dihydropyrimidinase                             | DZ | 0.532382 | 0.098237 | a  |
| Dihydropyrimidinase                             | EZ | 0.666853 | 0.252028 | a  |
| Dihydroxy-acid dehydratase                      | AZ | -0.87292 | 0.126309 | b  |



|                                     |    |          |          |    |
|-------------------------------------|----|----------|----------|----|
| Dihydroxy-acid dehydratase          | BZ | -0.96763 | 0.05593  | b  |
| Dihydroxy-acid dehydratase          | CZ | 0.418869 | 0.147337 | a  |
| Dihydroxy-acid dehydratase          | DZ | 0.910924 | 0.100522 | a  |
| Dihydroxy-acid dehydratase          | EZ | 0.510749 | 0.202202 | a  |
| Dipeptidyl-peptidase III            | AZ | -0.96183 | 0.159487 | b  |
| Dipeptidyl-peptidase III            | BZ | -0.8503  | 0.096049 | b  |
| Dipeptidyl-peptidase III            | CZ | 0.491324 | 0.101648 | a  |
| Dipeptidyl-peptidase III            | DZ | 0.853622 | 0.049901 | a  |
| Dipeptidyl-peptidase III            | EZ | 0.467181 | 0.225153 | a  |
| Dipeptidyl-peptidase IV             | AZ | -1.05097 | 0.177448 | b  |
| Dipeptidyl-peptidase IV             | BZ | -0.44373 | 0.146043 | ab |
| Dipeptidyl-peptidase IV             | CZ | 0.628667 | 0.190386 | a  |
| Dipeptidyl-peptidase IV             | DZ | 0.601597 | 0.086984 | a  |
| Dipeptidyl-peptidase IV             | EZ | 0.264441 | 0.19221  | a  |
| diphosphate specific)               | AZ | -0.97262 | 0.164095 | b  |
| diphosphate specific)               | BZ | -0.81743 | 0.0965   | b  |
| diphosphate specific)               | CZ | 0.519702 | 0.1163   | a  |
| diphosphate specific)               | DZ | 0.851976 | 0.037579 | a  |
| diphosphate specific)               | EZ | 0.418365 | 0.222632 | a  |
| Diphosphomevalonate decarboxylase   | AZ | 0.866802 | 0.103111 | a  |
| Diphosphomevalonate decarboxylase   | BZ | 0.962972 | 0.033353 | a  |
| Diphosphomevalonate decarboxylase   | CZ | -0.38555 | 0.173323 | b  |
| Diphosphomevalonate decarboxylase   | DZ | -0.76463 | 0.109365 | b  |
| Diphosphomevalonate decarboxylase   | EZ | -0.67959 | 0.206309 | b  |
| Diphthine synthase                  | AZ | 0.866659 | 0.102881 | a  |
| Diphthine synthase                  | BZ | 0.962763 | 0.033284 | a  |
| Diphthine synthase                  | CZ | -0.38295 | 0.172962 | b  |
| Diphthine synthase                  | DZ | -0.76987 | 0.110636 | b  |
| Diphthine synthase                  | EZ | -0.6766  | 0.205898 | b  |
| DNA (cytosine-5-)-methyltransferase | AZ | 0.877879 | 0.076274 | a  |
| DNA (cytosine-5-)-methyltransferase | BZ | 0.954228 | 0.023    | a  |
| DNA (cytosine-5-)-methyltransferase | CZ | -0.42481 | 0.178044 | b  |
| DNA (cytosine-5-)-methyltransferase | DZ | -0.72756 | 0.141883 | b  |
| DNA (cytosine-5-)-methyltransferase | EZ | -0.67974 | 0.197912 | b  |
| DNA ligase (ATP)                    | AZ | 0.879506 | 0.088817 | a  |
| DNA ligase (ATP)                    | BZ | 0.978186 | 0.025682 | a  |
| DNA ligase (ATP)                    | CZ | -0.47375 | 0.182827 | b  |
| DNA ligase (ATP)                    | DZ | -0.73537 | 0.11385  | b  |
| DNA ligase (ATP)                    | EZ | -0.64858 | 0.198123 | b  |
| DNA ligase (NAD(+))                 | AZ | 0.835046 | 0.086852 | a  |
| DNA ligase (NAD(+))                 | BZ | 0.92939  | 0.024518 | a  |
| DNA ligase (NAD(+))                 | CZ | -0.57938 | 0.190124 | b  |
| DNA ligase (NAD(+))                 | DZ | -0.80888 | 0.144687 | b  |
| DNA ligase (NAD(+))                 | EZ | -0.37618 | 0.200367 | b  |

|                                               |    |          |          |   |
|-----------------------------------------------|----|----------|----------|---|
| DNA topoisomerase                             | AZ | 0.806338 | 0.113358 | a |
| DNA topoisomerase                             | BZ | 0.948682 | 0.030708 | a |
| DNA topoisomerase                             | CZ | -0.32984 | 0.152494 | b |
| DNA topoisomerase                             | DZ | -0.77436 | 0.169032 | b |
| DNA topoisomerase                             | EZ | -0.65082 | 0.200678 | b |
| DNA topoisomerase (ATP-hydrolyzing)           | AZ | 0.878896 | 0.103108 | a |
| DNA topoisomerase (ATP-hydrolyzing)           | BZ | 0.968019 | 0.031129 | a |
| DNA topoisomerase (ATP-hydrolyzing)           | CZ | -0.39192 | 0.169772 | b |
| DNA topoisomerase (ATP-hydrolyzing)           | DZ | -0.83579 | 0.109078 | b |
| DNA topoisomerase (ATP-hydrolyzing)           | EZ | -0.6192  | 0.20106  | b |
| DNA-(apurinic or apyrimidinic site) lyase     | AZ | 0.828237 | 0.110532 | a |
| DNA-(apurinic or apyrimidinic site) lyase     | BZ | 0.863172 | 0.054667 | a |
| DNA-(apurinic or apyrimidinic site) lyase     | CZ | -0.52743 | 0.194249 | b |
| DNA-(apurinic or apyrimidinic site) lyase     | DZ | -0.53939 | 0.16924  | b |
| DNA-(apurinic or apyrimidinic site) lyase     | EZ | -0.62459 | 0.197244 | b |
| DNA-3-methyladenine glycosylase II            | AZ | -0.85219 | 0.152833 | b |
| DNA-3-methyladenine glycosylase II            | BZ | -0.99649 | 0.108609 | b |
| DNA-3-methyladenine glycosylase II            | CZ | 0.569026 | 0.099645 | a |
| DNA-3-methyladenine glycosylase II            | DZ | 0.793291 | 0.063493 | a |
| DNA-3-methyladenine glycosylase II            | EZ | 0.486357 | 0.213174 | a |
| DNA-directed DNA polymerase                   | AZ | 0.895643 | 0.091354 | a |
| DNA-directed DNA polymerase                   | BZ | 0.97424  | 0.029609 | a |
| DNA-directed DNA polymerase                   | CZ | -0.41314 | 0.169515 | b |
| DNA-directed DNA polymerase                   | DZ | -0.78301 | 0.105506 | b |
| DNA-directed DNA polymerase                   | EZ | -0.67373 | 0.203616 | b |
| DNA-directed RNA polymerase                   | AZ | 0.862055 | 0.097365 | a |
| DNA-directed RNA polymerase                   | BZ | 0.965308 | 0.031637 | a |
| DNA-directed RNA polymerase                   | CZ | -0.45383 | 0.175629 | b |
| DNA-directed RNA polymerase                   | DZ | -0.7051  | 0.12486  | b |
| DNA-directed RNA polymerase                   | EZ | -0.66842 | 0.204547 | b |
| Dodecenoyl-CoA isomerase                      | AZ | 0.813185 | 0.10765  | a |
| Dodecenoyl-CoA isomerase                      | BZ | 0.892638 | 0.034714 | a |
| Dodecenoyl-CoA isomerase                      | CZ | -0.20083 | 0.144657 | b |
| Dodecenoyl-CoA isomerase                      | DZ | -0.90828 | 0.168754 | b |
| Dodecenoyl-CoA isomerase                      | EZ | -0.59671 | 0.209358 | b |
| Dolichyl-phosphate beta-D-mannosyltransferase | AZ | 0.861107 | 0.107153 | a |
| Dolichyl-phosphate beta-D-mannosyltransferase | BZ | 0.961047 | 0.034661 | a |
| Dolichyl-phosphate beta-D-mannosyltransferase | CZ | -0.43803 | 0.179481 | b |
| Dolichyl-phosphate beta-D-mannosyltransferase | DZ | -0.77577 | 0.122213 | b |
| Dolichyl-phosphate beta-D-mannosyltransferase | EZ | -0.60835 | 0.19678  | b |
| Dolichyl-phosphate beta-glucosyltransferase   | AZ | 0.867047 | 0.10304  | a |
| Dolichyl-phosphate beta-glucosyltransferase   | BZ | 0.962425 | 0.033191 | a |
| Dolichyl-phosphate beta-glucosyltransferase   | CZ | -0.3877  | 0.173925 | b |
| Dolichyl-phosphate beta-glucosyltransferase   | DZ | -0.76338 | 0.109307 | b |

|                                                         |    |          |          |   |
|---------------------------------------------------------|----|----------|----------|---|
| Dolichyl-phosphate beta-glucosyltransferase             | EZ | -0.67839 | 0.206199 | b |
| Dolichyl-phosphate-mannose--protein mannosyltransferase | AZ | 0.877333 | 0.094757 | a |
| Dolichyl-phosphate-mannose--protein mannosyltransferase | BZ | 0.980731 | 0.02674  | a |
| Dolichyl-phosphate-mannose--protein mannosyltransferase | CZ | -0.39051 | 0.162942 | b |
| Dolichyl-phosphate-mannose--protein mannosyltransferase | DZ | -0.77457 | 0.118107 | b |
| Dolichyl-phosphate-mannose--protein mannosyltransferase | EZ | -0.69298 | 0.203949 | b |
| Dolichyldiphosphatase                                   | AZ | 0.867368 | 0.100021 | a |
| Dolichyldiphosphatase                                   | BZ | 0.958979 | 0.032277 | a |
| Dolichyldiphosphatase                                   | CZ | -0.35531 | 0.16965  | b |
| Dolichyldiphosphatase                                   | DZ | -0.76218 | 0.111714 | b |
| Dolichyldiphosphatase                                   | EZ | -0.70886 | 0.208836 | b |
| dTDP-4-dehydrorhamnose reductase                        | AZ | -0.90825 | 0.123915 | b |
| dTDP-4-dehydrorhamnose reductase                        | BZ | -0.9434  | 0.150561 | b |
| dTDP-4-dehydrorhamnose reductase                        | CZ | 0.639849 | 0.124046 | a |
| dTDP-4-dehydrorhamnose reductase                        | DZ | 0.709765 | 0.079869 | a |
| dTDP-4-dehydrorhamnose reductase                        | EZ | 0.502036 | 0.190272 | a |
| dTDP-glucose 4,6-dehydratase                            | AZ | 0.845853 | 0.04726  | a |
| dTDP-glucose 4,6-dehydratase                            | BZ | 0.817423 | 0.027576 | a |
| dTDP-glucose 4,6-dehydratase                            | CZ | -0.49577 | 0.234614 | b |
| dTDP-glucose 4,6-dehydratase                            | DZ | -0.5134  | 0.176644 | b |
| dTDP-glucose 4,6-dehydratase                            | EZ | -0.65411 | 0.186322 | b |
| dTMP kinase                                             | AZ | 0.869003 | 0.101853 | a |
| dTMP kinase                                             | BZ | 0.961099 | 0.033099 | a |
| dTMP kinase                                             | CZ | -0.37196 | 0.17163  | b |
| dTMP kinase                                             | DZ | -0.78328 | 0.111643 | b |
| dTMP kinase                                             | EZ | -0.67486 | 0.205669 | b |
| dUTP diphosphatase                                      | AZ | 0.808314 | 0.125982 | a |
| dUTP diphosphatase                                      | BZ | 0.915774 | 0.041947 | a |
| dUTP diphosphatase                                      | CZ | -0.22114 | 0.174174 | b |
| dUTP diphosphatase                                      | DZ | -0.84952 | 0.125499 | b |
| dUTP diphosphatase                                      | EZ | -0.65343 | 0.20446  | b |
| Electron-transferring-flavoprotein dehydrogenase        | AZ | 0.866802 | 0.103111 | a |
| Electron-transferring-flavoprotein dehydrogenase        | BZ | 0.962972 | 0.033353 | a |
| Electron-transferring-flavoprotein dehydrogenase        | CZ | -0.38555 | 0.173323 | b |
| Electron-transferring-flavoprotein dehydrogenase        | DZ | -0.76463 | 0.109365 | b |
| Electron-transferring-flavoprotein dehydrogenase        | EZ | -0.67959 | 0.206309 | b |
| Endo-1,3(4)-beta-glucanase                              | AZ | -0.8757  | 0.099626 | b |
| Endo-1,3(4)-beta-glucanase                              | BZ | -1.09717 | 0.084218 | b |
| Endo-1,3(4)-beta-glucanase                              | CZ | 0.693528 | 0.120397 | a |
| Endo-1,3(4)-beta-glucanase                              | DZ | 0.736839 | 0.08846  | a |
| Endo-1,3(4)-beta-glucanase                              | EZ | 0.542509 | 0.19031  | a |
| Endo-1,4-beta-xylanase                                  | AZ | -0.86866 | 0.078365 | b |
| Endo-1,4-beta-xylanase                                  | BZ | -1.16082 | 0.069909 | b |
| Endo-1,4-beta-xylanase                                  | CZ | 0.718428 | 0.109295 | a |

|                                               |    |          |          |   |
|-----------------------------------------------|----|----------|----------|---|
| Endo-1,4-beta-xylanase                        | DZ | 0.669971 | 0.088133 | a |
| Endo-1,4-beta-xylanase                        | EZ | 0.641081 | 0.188031 | a |
| Endopeptidase Clp                             | AZ | 0.878363 | 0.1008   | a |
| Endopeptidase Clp                             | BZ | 0.939057 | 0.039103 | a |
| Endopeptidase Clp                             | CZ | -0.33163 | 0.168665 | b |
| Endopeptidase Clp                             | DZ | -0.77716 | 0.109325 | b |
| Endopeptidase Clp                             | EZ | -0.70864 | 0.210801 | b |
| Endopeptidase La                              | AZ | 0.88085  | 0.104085 | a |
| Endopeptidase La                              | BZ | 0.944358 | 0.040482 | a |
| Endopeptidase La                              | CZ | -0.37057 | 0.173447 | b |
| Endopeptidase La                              | DZ | -0.77217 | 0.102079 | b |
| Endopeptidase La                              | EZ | -0.68247 | 0.208978 | b |
| Endothelin-converting enzyme 1                | AZ | 0.835601 | 0.093681 | a |
| Endothelin-converting enzyme 1                | BZ | 0.962459 | 0.026649 | a |
| Endothelin-converting enzyme 1                | CZ | -0.27264 | 0.153659 | b |
| Endothelin-converting enzyme 1                | DZ | -0.71203 | 0.119706 | b |
| Endothelin-converting enzyme 1                | EZ | -0.81339 | 0.221809 | b |
| Enoyl-[acyl-carrier-protein] reductase (NADH) | AZ | -0.91871 | 0.120513 | b |
| Enoyl-[acyl-carrier-protein] reductase (NADH) | BZ | -0.95718 | 0.147102 | b |
| Enoyl-[acyl-carrier-protein] reductase (NADH) | CZ | 0.638484 | 0.113559 | a |
| Enoyl-[acyl-carrier-protein] reductase (NADH) | DZ | 0.680863 | 0.076623 | a |
| Enoyl-[acyl-carrier-protein] reductase (NADH) | EZ | 0.55654  | 0.194965 | a |
| Enoyl-CoA hydratase                           | AZ | -0.79318 | 0.121107 | b |
| Enoyl-CoA hydratase                           | BZ | -0.93122 | 0.041263 | b |
| Enoyl-CoA hydratase                           | CZ | 0.570856 | 0.216209 | a |
| Enoyl-CoA hydratase                           | DZ | 0.531982 | 0.11245  | a |
| Enoyl-CoA hydratase                           | EZ | 0.62156  | 0.199156 | a |
| Ethanolamine kinase                           | AZ | 0.839879 | 0.060378 | a |
| Ethanolamine kinase                           | BZ | 0.911535 | 0.015855 | a |
| Ethanolamine kinase                           | CZ | -0.14484 | 0.167494 | b |
| Ethanolamine kinase                           | DZ | -0.79322 | 0.144907 | b |
| Ethanolamine kinase                           | EZ | -0.81335 | 0.211306 | b |
| Ethanolamine-phosphate cytidyltransferase     | AZ | 0.815717 | 0.0599   | a |
| Ethanolamine-phosphate cytidyltransferase     | BZ | 0.910086 | 0.012595 | a |
| Ethanolamine-phosphate cytidyltransferase     | CZ | -0.12323 | 0.161185 | b |
| Ethanolamine-phosphate cytidyltransferase     | DZ | -0.82455 | 0.168466 | b |
| Ethanolamine-phosphate cytidyltransferase     | EZ | -0.77802 | 0.205401 | b |
| Ethanolaminephosphotransferase                | AZ | 0.873465 | 0.096645 | a |
| Ethanolaminephosphotransferase                | BZ | 0.958418 | 0.029897 | a |
| Ethanolaminephosphotransferase                | CZ | -0.53098 | 0.205701 | b |
| Ethanolaminephosphotransferase                | DZ | -0.72306 | 0.100966 | b |
| Ethanolaminephosphotransferase                | EZ | -0.57784 | 0.190396 | b |
| Exodeoxyribonuclease I                        | AZ | -0.81427 | 0.150466 | b |
| Exodeoxyribonuclease I                        | BZ | -0.93303 | 0.053071 | b |

|                                      |    |          |          |    |
|--------------------------------------|----|----------|----------|----|
| Exodeoxyribonuclease I               | CZ | 0.396306 | 0.174563 | a  |
| Exodeoxyribonuclease I               | DZ | 0.773478 | 0.092986 | a  |
| Exodeoxyribonuclease I               | EZ | 0.57751  | 0.210486 | a  |
| Exodeoxyribonuclease III             | AZ | -0.90714 | 0.128328 | b  |
| Exodeoxyribonuclease III             | BZ | -0.9203  | 0.166701 | b  |
| Exodeoxyribonuclease III             | CZ | 0.604986 | 0.122648 | a  |
| Exodeoxyribonuclease III             | DZ | 0.730794 | 0.07671  | a  |
| Exodeoxyribonuclease III             | EZ | 0.491656 | 0.185024 | a  |
| Exopolyphosphatase                   | AZ | 0.852634 | 0.108233 | a  |
| Exopolyphosphatase                   | BZ | 0.956631 | 0.035052 | a  |
| Exopolyphosphatase                   | CZ | -0.43332 | 0.178934 | b  |
| Exopolyphosphatase                   | DZ | -0.71809 | 0.122164 | b  |
| Exopolyphosphatase                   | EZ | -0.65785 | 0.202977 | b  |
| Exoribonuclease II                   | AZ | 0.846506 | 0.075677 | a  |
| Exoribonuclease II                   | BZ | 0.911938 | 0.027105 | a  |
| Exoribonuclease II                   | CZ | -0.40036 | 0.166708 | b  |
| Exoribonuclease II                   | DZ | -0.79575 | 0.140891 | b  |
| Exoribonuclease II                   | EZ | -0.56233 | 0.230217 | b  |
| Factor independent urate hydroxylase | AZ | -0.92404 | 0.15385  | b  |
| Factor independent urate hydroxylase | BZ | -0.91082 | 0.10043  | b  |
| Factor independent urate hydroxylase | CZ | 0.543322 | 0.107363 | a  |
| Factor independent urate hydroxylase | DZ | 0.838247 | 0.049594 | a  |
| Factor independent urate hydroxylase | EZ | 0.453288 | 0.218905 | a  |
| FAD synthetase                       | AZ | 0.795408 | 0.129881 | a  |
| FAD synthetase                       | BZ | 0.944773 | 0.051275 | a  |
| FAD synthetase                       | CZ | -0.21661 | 0.161352 | b  |
| FAD synthetase                       | DZ | -0.84861 | 0.113737 | b  |
| FAD synthetase                       | EZ | -0.67496 | 0.210085 | b  |
| Farnesol dehydrogenase               | AZ | -0.56988 | 0.054405 | bc |
| Farnesol dehydrogenase               | BZ | -0.9875  | 0.147211 | c  |
| Farnesol dehydrogenase               | CZ | 0.553739 | 0.02923  | a  |
| Farnesol dehydrogenase               | DZ | 0.081259 | 0.25686  | ab |
| Farnesol dehydrogenase               | EZ | 0.922386 | 0.159186 | a  |
| Fatty-acid synthase                  | AZ | -0.92131 | 0.126391 | b  |
| Fatty-acid synthase                  | BZ | -0.98216 | 0.08409  | b  |
| Fatty-acid synthase                  | CZ | 0.642496 | 0.102338 | a  |
| Fatty-acid synthase                  | DZ | 0.70546  | 0.078685 | a  |
| Fatty-acid synthase                  | EZ | 0.555513 | 0.220599 | a  |
| Fatty-acyl-CoA synthase              | AZ | -0.90969 | 0.115267 | b  |
| Fatty-acyl-CoA synthase              | BZ | -0.95414 | 0.141032 | b  |
| Fatty-acyl-CoA synthase              | CZ | 0.685066 | 0.13735  | a  |
| Fatty-acyl-CoA synthase              | DZ | 0.723194 | 0.085305 | a  |
| Fatty-acyl-CoA synthase              | EZ | 0.455572 | 0.183825 | a  |
| Ferredoxin--NADP(+) reductase        | AZ | 0.819251 | 0.088611 | a  |

|                                 |    |          |          |    |
|---------------------------------|----|----------|----------|----|
| Ferredoxin--NADP(+) reductase   | BZ | 0.898189 | 0.026884 | a  |
| Ferredoxin--NADP(+) reductase   | CZ | -0.36224 | 0.189937 | b  |
| Ferredoxin--NADP(+) reductase   | DZ | -0.8341  | 0.177618 | b  |
| Ferredoxin--NADP(+) reductase   | EZ | -0.5211  | 0.187033 | b  |
| Ferrochelataase                 | AZ | 0.80222  | 0.142181 | a  |
| Ferrochelataase                 | BZ | 0.915018 | 0.049803 | a  |
| Ferrochelataase                 | CZ | -0.19186 | 0.163065 | b  |
| Ferrochelataase                 | DZ | -0.85798 | 0.103863 | b  |
| Ferrochelataase                 | EZ | -0.66739 | 0.212056 | b  |
| Ferroxidase                     | AZ | -0.90952 | 0.123718 | b  |
| Ferroxidase                     | BZ | -0.94461 | 0.150321 | b  |
| Ferroxidase                     | CZ | 0.645753 | 0.123083 | a  |
| Ferroxidase                     | DZ | 0.707076 | 0.079349 | a  |
| Ferroxidase                     | EZ | 0.501301 | 0.190429 | a  |
| Feruloyl esterase               | AZ | -0.93148 | 0.110323 | b  |
| Feruloyl esterase               | BZ | -0.97411 | 0.146873 | b  |
| Feruloyl esterase               | CZ | 0.640422 | 0.098296 | a  |
| Feruloyl esterase               | DZ | 0.611997 | 0.070341 | a  |
| Feruloyl esterase               | EZ | 0.653175 | 0.200633 | a  |
| Flavanone 3-dioxygenase         | AZ | -0.95673 | 0.15581  | b  |
| Flavanone 3-dioxygenase         | BZ | -0.8687  | 0.090217 | b  |
| Flavanone 3-dioxygenase         | CZ | 0.590792 | 0.119343 | a  |
| Flavanone 3-dioxygenase         | DZ | 0.804119 | 0.045373 | a  |
| Flavanone 3-dioxygenase         | EZ | 0.430522 | 0.220758 | a  |
| Flavin-containing monooxygenase | AZ | -0.93897 | 0.138805 | b  |
| Flavin-containing monooxygenase | BZ | -0.95143 | 0.061363 | b  |
| Flavin-containing monooxygenase | CZ | 0.520097 | 0.131968 | a  |
| Flavin-containing monooxygenase | DZ | 0.814861 | 0.062894 | a  |
| Flavin-containing monooxygenase | EZ | 0.55545  | 0.21     | a  |
| Flavonoid 3'-monooxygenase      | AZ | -0.86256 | 0.215038 | b  |
| Flavonoid 3'-monooxygenase      | BZ | -0.73753 | 0.07898  | b  |
| Flavonoid 3'-monooxygenase      | CZ | 0.125479 | 0.104025 | ab |
| Flavonoid 3'-monooxygenase      | DZ | 0.960877 | 0.179714 | a  |
| Flavonoid 3'-monooxygenase      | EZ | 0.513735 | 0.140915 | a  |
| Formamidase                     | AZ | -0.97125 | 0.157303 | b  |
| Formamidase                     | BZ | -0.87098 | 0.08543  | b  |
| Formamidase                     | CZ | 0.481677 | 0.095764 | a  |
| Formamidase                     | DZ | 0.885375 | 0.056545 | a  |
| Formamidase                     | EZ | 0.475178 | 0.220018 | a  |
| Formate dehydrogenase           | AZ | -0.98872 | 0.163148 | b  |
| Formate dehydrogenase           | BZ | -0.82584 | 0.098056 | b  |
| Formate dehydrogenase           | CZ | 0.539672 | 0.109791 | a  |
| Formate dehydrogenase           | DZ | 0.842627 | 0.046846 | a  |
| Formate dehydrogenase           | EZ | 0.432262 | 0.217104 | a  |

|                                           |    |          |          |    |
|-------------------------------------------|----|----------|----------|----|
| Formyltetrahydrofolate deformylase        | AZ | -0.89245 | 0.163891 | b  |
| Formyltetrahydrofolate deformylase        | BZ | -0.87555 | 0.103226 | b  |
| Formyltetrahydrofolate deformylase        | CZ | 0.556006 | 0.094107 | a  |
| Formyltetrahydrofolate deformylase        | DZ | 0.786547 | 0.078955 | a  |
| Formyltetrahydrofolate deformylase        | EZ | 0.425447 | 0.231951 | a  |
| Fructose-2,6-bisphosphate 2-phosphatase   | AZ | -0.75631 | 0.137009 | c  |
| Fructose-2,6-bisphosphate 2-phosphatase   | BZ | -0.89133 | 0.035196 | c  |
| Fructose-2,6-bisphosphate 2-phosphatase   | CZ | -0.03959 | 0.140602 | bc |
| Fructose-2,6-bisphosphate 2-phosphatase   | DZ | 1.033722 | 0.10827  | a  |
| Fructose-2,6-bisphosphate 2-phosphatase   | EZ | 0.653511 | 0.212869 | ab |
| Fructose-bisphosphatase                   | AZ | 0.866802 | 0.103111 | a  |
| Fructose-bisphosphatase                   | BZ | 0.962972 | 0.033353 | a  |
| Fructose-bisphosphatase                   | CZ | -0.38555 | 0.173323 | b  |
| Fructose-bisphosphatase                   | DZ | -0.76463 | 0.109365 | b  |
| Fructose-bisphosphatase                   | EZ | -0.67959 | 0.206309 | b  |
| Fructose-bisphosphate aldolase            | AZ | 0.866714 | 0.088581 | a  |
| Fructose-bisphosphate aldolase            | BZ | 0.968508 | 0.023669 | a  |
| Fructose-bisphosphate aldolase            | CZ | -0.29082 | 0.167617 | b  |
| Fructose-bisphosphate aldolase            | DZ | -0.87798 | 0.121653 | b  |
| Fructose-bisphosphate aldolase            | EZ | -0.66643 | 0.198144 | b  |
| Fumarate hydratase                        | AZ | 0.866798 | 0.103114 | a  |
| Fumarate hydratase                        | BZ | 0.96297  | 0.033354 | a  |
| Fumarate hydratase                        | CZ | -0.38558 | 0.173327 | b  |
| Fumarate hydratase                        | DZ | -0.76467 | 0.109368 | b  |
| Fumarate hydratase                        | EZ | -0.67951 | 0.206306 | b  |
| Galactinol--sucrose galactosyltransferase | AZ | -0.90064 | 0.150004 | b  |
| Galactinol--sucrose galactosyltransferase | BZ | -0.80898 | 0.156116 | b  |
| Galactinol--sucrose galactosyltransferase | CZ | 0.748152 | 0.116684 | a  |
| Galactinol--sucrose galactosyltransferase | DZ | 0.408587 | 0.141122 | a  |
| Galactinol--sucrose galactosyltransferase | EZ | 0.552882 | 0.186275 | a  |
| Galactokinase                             | AZ | 0.866641 | 0.102984 | a  |
| Galactokinase                             | BZ | 0.962692 | 0.033312 | a  |
| Galactokinase                             | CZ | -0.38728 | 0.173973 | b  |
| Galactokinase                             | DZ | -0.76278 | 0.10923  | b  |
| Galactokinase                             | EZ | -0.67928 | 0.206236 | b  |
| Galactonate dehydratase                   | AZ | -0.9096  | 0.155051 | b  |
| Galactonate dehydratase                   | BZ | -0.93544 | 0.094067 | b  |
| Galactonate dehydratase                   | CZ | 0.580966 | 0.097432 | a  |
| Galactonate dehydratase                   | DZ | 0.791781 | 0.066693 | a  |
| Galactonate dehydratase                   | EZ | 0.472287 | 0.220623 | a  |
| Galactose oxidase                         | AZ | -0.86577 | 0.081599 | b  |
| Galactose oxidase                         | BZ | -1.18528 | 0.06358  | b  |
| Galactose oxidase                         | CZ | 0.734458 | 0.099367 | a  |
| Galactose oxidase                         | DZ | 0.633332 | 0.089641 | a  |

|                                                                   |    |          |          |    |
|-------------------------------------------------------------------|----|----------|----------|----|
| Galactose oxidase                                                 | EZ | 0.683261 | 0.182478 | a  |
| Galacturan 1,4-alpha-galacturonidase                              | AZ | -0.8738  | 0.166675 | b  |
| Galacturan 1,4-alpha-galacturonidase                              | BZ | -0.88604 | 0.106361 | b  |
| Galacturan 1,4-alpha-galacturonidase                              | CZ | 0.533786 | 0.121649 | a  |
| Galacturan 1,4-alpha-galacturonidase                              | DZ | 0.794108 | 0.045592 | a  |
| Galacturan 1,4-alpha-galacturonidase                              | EZ | 0.431948 | 0.226923 | a  |
| Gamma-butyrobetaine dioxygenase                                   | AZ | 0.915639 | 0.098987 | a  |
| Gamma-butyrobetaine dioxygenase                                   | BZ | 0.894311 | 0.062651 | a  |
| Gamma-butyrobetaine dioxygenase                                   | CZ | -0.40948 | 0.204425 | b  |
| Gamma-butyrobetaine dioxygenase                                   | DZ | -0.83573 | 0.062484 | b  |
| Gamma-butyrobetaine dioxygenase                                   | EZ | -0.56473 | 0.198546 | b  |
| Gamma-glutamyltransferase                                         | AZ | 0.861891 | 0.084074 | a  |
| Gamma-glutamyltransferase                                         | BZ | 0.899508 | 0.037382 | a  |
| Gamma-glutamyltransferase                                         | CZ | -0.43404 | 0.217634 | b  |
| Gamma-glutamyltransferase                                         | DZ | -0.7563  | 0.126786 | b  |
| Gamma-glutamyltransferase                                         | EZ | -0.57106 | 0.190189 | b  |
| Gastricsin                                                        | AZ | 0.807492 | 0.061268 | a  |
| Gastricsin                                                        | BZ | 0.857597 | 0.023432 | a  |
| Gastricsin                                                        | CZ | -0.38441 | 0.171767 | b  |
| Gastricsin                                                        | DZ | -0.29148 | 0.151981 | b  |
| Gastricsin                                                        | EZ | -0.9892  | 0.230557 | b  |
| GDP-Man:Man(1)GlcNAc(2)-PP-dolichol alpha-1,3-mannosyltransferase | AZ | 0.862866 | 0.080861 | a  |
| GDP-Man:Man(1)GlcNAc(2)-PP-dolichol alpha-1,3-mannosyltransferase | BZ | 0.925127 | 0.028705 | a  |
| GDP-Man:Man(1)GlcNAc(2)-PP-dolichol alpha-1,3-mannosyltransferase | CZ | -0.4468  | 0.205433 | b  |
| GDP-Man:Man(1)GlcNAc(2)-PP-dolichol alpha-1,3-mannosyltransferase | DZ | -0.71895 | 0.120563 | b  |
| GDP-Man:Man(1)GlcNAc(2)-PP-dolichol alpha-1,3-mannosyltransferase | EZ | -0.62224 | 0.201728 | b  |
| GDP-Man:Man(3)GlcNAc(2)-PP-dolichol alpha-1,2-mannosyltransferase | AZ | -0.93975 | 0.159633 | b  |
| GDP-Man:Man(3)GlcNAc(2)-PP-dolichol alpha-1,2-mannosyltransferase | BZ | -0.88984 | 0.09832  | b  |
| GDP-Man:Man(3)GlcNAc(2)-PP-dolichol alpha-1,2-mannosyltransferase | CZ | 0.514665 | 0.110285 | a  |
| GDP-Man:Man(3)GlcNAc(2)-PP-dolichol alpha-1,2-mannosyltransferase | DZ | 0.878008 | 0.03771  | a  |
| GDP-Man:Man(3)GlcNAc(2)-PP-dolichol alpha-1,2-mannosyltransferase | EZ | 0.436918 | 0.214906 | a  |
| GDP-mannose 4,6-dehydratase                                       | AZ | 0.817677 | 0.057639 | a  |
| GDP-mannose 4,6-dehydratase                                       | BZ | 0.882654 | 0.016472 | a  |
| GDP-mannose 4,6-dehydratase                                       | CZ | -0.10255 | 0.151111 | ab |
| GDP-mannose 4,6-dehydratase                                       | DZ | -0.71348 | 0.168882 | b  |
| GDP-mannose 4,6-dehydratase                                       | EZ | -0.8843  | 0.218149 | b  |
| Gentisate 1,2-dioxygenase                                         | AZ | -0.86261 | 0.070201 | b  |
| Gentisate 1,2-dioxygenase                                         | BZ | -1.18146 | 0.085393 | b  |
| Gentisate 1,2-dioxygenase                                         | CZ | 0.760114 | 0.097335 | a  |
| Gentisate 1,2-dioxygenase                                         | DZ | 0.59939  | 0.091215 | a  |
| Gentisate 1,2-dioxygenase                                         | EZ | 0.684561 | 0.180847 | a  |
| Gibberellin 2-beta-dioxygenase                                    | AZ | -0.93036 | 0.161832 | b  |
| Gibberellin 2-beta-dioxygenase                                    | BZ | -0.93533 | 0.094238 | b  |
| Gibberellin 2-beta-dioxygenase                                    | CZ | 0.571708 | 0.100574 | a  |



|                                        |    |          |          |    |
|----------------------------------------|----|----------|----------|----|
| Gibberellin 2-beta-dioxygenase         | DZ | 0.815236 | 0.04286  | a  |
| Gibberellin 2-beta-dioxygenase         | EZ | 0.478747 | 0.211952 | a  |
| Gibberellin 3-beta-dioxygenase         | AZ | -0.72824 | 0.069862 | b  |
| Gibberellin 3-beta-dioxygenase         | BZ | -0.77056 | 0.071886 | b  |
| Gibberellin 3-beta-dioxygenase         | CZ | 0.61804  | 0.033576 | a  |
| Gibberellin 3-beta-dioxygenase         | DZ | -0.03068 | 0.280935 | ab |
| Gibberellin 3-beta-dioxygenase         | EZ | 0.911445 | 0.181693 | a  |
| Gibberellin-44 dioxygenase             | AZ | -0.96755 | 0.090782 | b  |
| Gibberellin-44 dioxygenase             | BZ | -0.99187 | 0.155889 | b  |
| Gibberellin-44 dioxygenase             | CZ | 0.584763 | 0.076445 | a  |
| Gibberellin-44 dioxygenase             | DZ | 0.609108 | 0.055558 | a  |
| Gibberellin-44 dioxygenase             | EZ | 0.765554 | 0.193847 | a  |
| Glucan 1,3-alpha-glucosidase           | AZ | 0.78523  | 0.121314 | a  |
| Glucan 1,3-alpha-glucosidase           | BZ | 0.912185 | 0.041996 | a  |
| Glucan 1,3-alpha-glucosidase           | CZ | -0.23037 | 0.144654 | b  |
| Glucan 1,3-alpha-glucosidase           | DZ | -0.70523 | 0.124307 | b  |
| Glucan 1,3-alpha-glucosidase           | EZ | -0.76182 | 0.241184 | b  |
| Glucan 1,3-beta-glucosidase            | AZ | -0.93853 | 0.162661 | b  |
| Glucan 1,3-beta-glucosidase            | BZ | -0.87701 | 0.104616 | b  |
| Glucan 1,3-beta-glucosidase            | CZ | 0.576822 | 0.108998 | a  |
| Glucan 1,3-beta-glucosidase            | DZ | 0.76485  | 0.046522 | a  |
| Glucan 1,3-beta-glucosidase            | EZ | 0.473871 | 0.221221 | a  |
| Glucan endo-1,3-alpha-glucosidase      | AZ | -0.95184 | 0.152322 | b  |
| Glucan endo-1,3-alpha-glucosidase      | BZ | -0.87213 | 0.091409 | b  |
| Glucan endo-1,3-alpha-glucosidase      | CZ | 0.565191 | 0.110217 | a  |
| Glucan endo-1,3-alpha-glucosidase      | DZ | 0.860792 | 0.049356 | a  |
| Glucan endo-1,3-alpha-glucosidase      | EZ | 0.397989 | 0.222684 | a  |
| Glucan endo-1,3-beta-D-glucosidase     | AZ | -0.90787 | 0.145186 | b  |
| Glucan endo-1,3-beta-D-glucosidase     | BZ | -0.88086 | 0.165966 | b  |
| Glucan endo-1,3-beta-D-glucosidase     | CZ | 0.600739 | 0.120863 | a  |
| Glucan endo-1,3-beta-D-glucosidase     | DZ | 0.715926 | 0.081683 | a  |
| Glucan endo-1,3-beta-D-glucosidase     | EZ | 0.472067 | 0.187816 | a  |
| Glucomannan 4-beta-mannosyltransferase | AZ | -0.79159 | 0.103441 | b  |
| Glucomannan 4-beta-mannosyltransferase | BZ | -1.15576 | 0.057951 | b  |
| Glucomannan 4-beta-mannosyltransferase | CZ | 0.790028 | 0.133696 | a  |
| Glucomannan 4-beta-mannosyltransferase | DZ | 0.702436 | 0.118271 | a  |
| Glucomannan 4-beta-mannosyltransferase | EZ | 0.454893 | 0.172436 | a  |
| Gluconate 2-dehydrogenase              | AZ | -0.91357 | 0.158928 | b  |
| Gluconate 2-dehydrogenase              | BZ | -0.87659 | 0.097108 | b  |
| Gluconate 2-dehydrogenase              | CZ | 0.54477  | 0.102262 | a  |
| Gluconate 2-dehydrogenase              | DZ | 0.821432 | 0.078104 | a  |
| Gluconate 2-dehydrogenase              | EZ | 0.423955 | 0.225921 | a  |
| Gluconolactonase                       | AZ | -0.94246 | 0.154226 | b  |
| Gluconolactonase                       | BZ | -0.89683 | 0.10965  | b  |

|                                             |    |          |          |    |
|---------------------------------------------|----|----------|----------|----|
| Gluconolactonase                            | CZ | 0.59767  | 0.102439 | a  |
| Gluconolactonase                            | DZ | 0.758877 | 0.052702 | a  |
| Gluconolactonase                            | EZ | 0.482746 | 0.219056 | a  |
| Glucosamine-6-phosphate deaminase           | AZ | 0.783763 | 0.072476 | a  |
| Glucosamine-6-phosphate deaminase           | BZ | 0.802653 | 0.036455 | a  |
| Glucosamine-6-phosphate deaminase           | CZ | 0.041779 | 0.155641 | ab |
| Glucosamine-6-phosphate deaminase           | DZ | -0.63434 | 0.125425 | bc |
| Glucosamine-6-phosphate deaminase           | EZ | -0.99386 | 0.246864 | c  |
| Glucosamine-phosphate N-acetyltransferase   | AZ | 0.878719 | 0.088422 | a  |
| Glucosamine-phosphate N-acetyltransferase   | BZ | 0.973118 | 0.025689 | a  |
| Glucosamine-phosphate N-acetyltransferase   | CZ | -0.33655 | 0.156037 | b  |
| Glucosamine-phosphate N-acetyltransferase   | DZ | -0.84935 | 0.128979 | b  |
| Glucosamine-phosphate N-acetyltransferase   | EZ | -0.66593 | 0.201684 | b  |
| Glucose-1-phosphate adenylyltransferase     | AZ | -1.13404 | 0.171314 | c  |
| Glucose-1-phosphate adenylyltransferase     | BZ | -0.52784 | 0.098721 | bc |
| Glucose-1-phosphate adenylyltransferase     | CZ | 0.225731 | 0.096971 | ab |
| Glucose-1-phosphate adenylyltransferase     | DZ | 1.029677 | 0.084282 | a  |
| Glucose-1-phosphate adenylyltransferase     | EZ | 0.406464 | 0.205782 | ab |
| Glucose-6-phosphate 1-epimerase             | AZ | -0.90841 | 0.123829 | b  |
| Glucose-6-phosphate 1-epimerase             | BZ | -0.94353 | 0.150456 | b  |
| Glucose-6-phosphate 1-epimerase             | CZ | 0.638615 | 0.12396  | a  |
| Glucose-6-phosphate 1-epimerase             | DZ | 0.709639 | 0.07942  | a  |
| Glucose-6-phosphate 1-epimerase             | EZ | 0.50368  | 0.190599 | a  |
| Glucose-6-phosphate dehydrogenase (NADP(+)) | AZ | 0.863637 | 0.102324 | a  |
| Glucose-6-phosphate dehydrogenase (NADP(+)) | BZ | 0.958034 | 0.033545 | a  |
| Glucose-6-phosphate dehydrogenase (NADP(+)) | CZ | -0.38893 | 0.173283 | b  |
| Glucose-6-phosphate dehydrogenase (NADP(+)) | DZ | -0.74616 | 0.11751  | b  |
| Glucose-6-phosphate dehydrogenase (NADP(+)) | EZ | -0.68658 | 0.205945 | b  |
| Glucose-6-phosphate isomerase               | AZ | 0.866802 | 0.103111 | a  |
| Glucose-6-phosphate isomerase               | BZ | 0.962972 | 0.033353 | a  |
| Glucose-6-phosphate isomerase               | CZ | -0.38555 | 0.173323 | b  |
| Glucose-6-phosphate isomerase               | DZ | -0.76463 | 0.109365 | b  |
| Glucose-6-phosphate isomerase               | EZ | -0.67959 | 0.206309 | b  |
| Glucose-fructose oxidoreductase             | AZ | -0.63625 | 0.057188 | b  |
| Glucose-fructose oxidoreductase             | BZ | -1.36217 | 0.135688 | c  |
| Glucose-fructose oxidoreductase             | CZ | 0.731602 | 0.094291 | a  |
| Glucose-fructose oxidoreductase             | DZ | 0.615538 | 0.093711 | a  |
| Glucose-fructose oxidoreductase             | EZ | 0.651273 | 0.14393  | a  |
| Glucosylceramidase                          | AZ | -0.97169 | 0.162065 | b  |
| Glucosylceramidase                          | BZ | -0.7997  | 0.100039 | b  |
| Glucosylceramidase                          | CZ | 0.427171 | 0.100955 | a  |
| Glucosylceramidase                          | DZ | 0.870011 | 0.043178 | a  |
| Glucosylceramidase                          | EZ | 0.47421  | 0.232965 | a  |
| Glucuronosyltransferase                     | AZ | -1.09081 | 0.145887 | b  |

|                                   |    |          |          |     |
|-----------------------------------|----|----------|----------|-----|
| Glucuronosyltransferase           | BZ | -0.72525 | 0.103126 | b   |
| Glucuronosyltransferase           | CZ | 0.615164 | 0.114142 | a   |
| Glucuronosyltransferase           | DZ | 0.74122  | 0.041721 | a   |
| Glucuronosyltransferase           | EZ | 0.459681 | 0.224862 | a   |
| Glutamate 5-kinase                | AZ | 0.866802 | 0.103111 | a   |
| Glutamate 5-kinase                | BZ | 0.962972 | 0.033353 | a   |
| Glutamate 5-kinase                | CZ | -0.38555 | 0.173323 | b   |
| Glutamate 5-kinase                | DZ | -0.76463 | 0.109365 | b   |
| Glutamate 5-kinase                | EZ | -0.67959 | 0.206309 | b   |
| Glutamate carboxypeptidase II     | AZ | -0.94952 | 0.157366 | b   |
| Glutamate carboxypeptidase II     | BZ | -0.89225 | 0.099568 | b   |
| Glutamate carboxypeptidase II     | CZ | 0.569074 | 0.105251 | a   |
| Glutamate carboxypeptidase II     | DZ | 0.805314 | 0.050005 | a   |
| Glutamate carboxypeptidase II     | EZ | 0.467387 | 0.217525 | a   |
| Glutamate decarboxylase           | AZ | 0.660097 | 0.168691 | a   |
| Glutamate decarboxylase           | BZ | 0.736256 | 0.064393 | a   |
| Glutamate decarboxylase           | CZ | -0.24374 | 0.1177   | ab  |
| Glutamate decarboxylase           | DZ | -1.09078 | 0.240718 | b   |
| Glutamate decarboxylase           | EZ | -0.06183 | 0.155102 | ab  |
| Glutamate dehydrogenase           | AZ | 0.867003 | 0.102901 | a   |
| Glutamate dehydrogenase           | BZ | 0.962252 | 0.033146 | a   |
| Glutamate dehydrogenase           | CZ | -0.38285 | 0.172995 | b   |
| Glutamate dehydrogenase           | DZ | -0.76985 | 0.110658 | b   |
| Glutamate dehydrogenase           | EZ | -0.67656 | 0.205938 | b   |
| Glutamate dehydrogenase (NADP(+)) | AZ | 0.886955 | 0.097269 | a   |
| Glutamate dehydrogenase (NADP(+)) | BZ | 0.98034  | 0.028829 | a   |
| Glutamate dehydrogenase (NADP(+)) | CZ | -0.3227  | 0.174557 | b   |
| Glutamate dehydrogenase (NADP(+)) | DZ | -0.87218 | 0.061465 | b   |
| Glutamate dehydrogenase (NADP(+)) | EZ | -0.67241 | 0.205482 | b   |
| Glutamate synthase (NADPH)        | AZ | 0.890243 | 0.078287 | a   |
| Glutamate synthase (NADPH)        | BZ | 0.954318 | 0.026527 | a   |
| Glutamate synthase (NADPH)        | CZ | -0.50955 | 0.190823 | b   |
| Glutamate synthase (NADPH)        | DZ | -0.74683 | 0.12109  | b   |
| Glutamate synthase (NADPH)        | EZ | -0.58817 | 0.196878 | b   |
| Glutamate--ammonia ligase         | AZ | 0.554805 | 0.106874 | ab  |
| Glutamate--ammonia ligase         | BZ | 0.653671 | 0.045707 | a   |
| Glutamate--ammonia ligase         | CZ | -0.78602 | 0.236465 | c   |
| Glutamate--ammonia ligase         | DZ | 0.214148 | 0.142552 | abc |
| Glutamate--ammonia ligase         | EZ | -0.6366  | 0.245051 | bc  |
| Glutamate--cysteine ligase        | AZ | 0.887212 | 0.089179 | a   |
| Glutamate--cysteine ligase        | BZ | 0.960341 | 0.027275 | a   |
| Glutamate--cysteine ligase        | CZ | -0.59135 | 0.200393 | b   |
| Glutamate--cysteine ligase        | DZ | -0.67322 | 0.109674 | b   |
| Glutamate--cysteine ligase        | EZ | -0.58298 | 0.19107  | b   |

|                                                            |    |          |          |   |
|------------------------------------------------------------|----|----------|----------|---|
| Glutamate--tRNA ligase                                     | AZ | 0.848744 | 0.106068 | a |
| Glutamate--tRNA ligase                                     | BZ | 0.954321 | 0.031294 | a |
| Glutamate--tRNA ligase                                     | CZ | -0.51568 | 0.203355 | b |
| Glutamate--tRNA ligase                                     | DZ | -0.66662 | 0.101607 | b |
| Glutamate--tRNA ligase                                     | EZ | -0.62077 | 0.199387 | b |
| Glutamate-1-semialdehyde 2,1-aminomutase                   | AZ | -0.82627 | 0.149378 | b |
| Glutamate-1-semialdehyde 2,1-aminomutase                   | BZ | -1.00032 | 0.099386 | b |
| Glutamate-1-semialdehyde 2,1-aminomutase                   | CZ | 0.592646 | 0.090828 | a |
| Glutamate-1-semialdehyde 2,1-aminomutase                   | DZ | 0.722774 | 0.0989   | a |
| Glutamate-1-semialdehyde 2,1-aminomutase                   | EZ | 0.511172 | 0.221049 | a |
| Glutamate-5-semialdehyde dehydrogenase                     | AZ | 0.867146 | 0.103132 | a |
| Glutamate-5-semialdehyde dehydrogenase                     | BZ | 0.96246  | 0.033215 | a |
| Glutamate-5-semialdehyde dehydrogenase                     | CZ | -0.38545 | 0.173357 | b |
| Glutamate-5-semialdehyde dehydrogenase                     | DZ | -0.7646  | 0.109387 | b |
| Glutamate-5-semialdehyde dehydrogenase                     | EZ | -0.67955 | 0.206349 | b |
| Glutamine--fructose-6-phosphate transaminase (isomerizing) | AZ | 0.882772 | 0.101468 | a |
| Glutamine--fructose-6-phosphate transaminase (isomerizing) | BZ | 0.954976 | 0.0333   | a |
| Glutamine--fructose-6-phosphate transaminase (isomerizing) | CZ | -0.38945 | 0.172247 | b |
| Glutamine--fructose-6-phosphate transaminase (isomerizing) | DZ | -0.76095 | 0.107357 | b |
| Glutamine--fructose-6-phosphate transaminase (isomerizing) | EZ | -0.68735 | 0.20659  | b |
| Glutamine--tRNA ligase                                     | AZ | 0.866802 | 0.103111 | a |
| Glutamine--tRNA ligase                                     | BZ | 0.962972 | 0.033353 | a |
| Glutamine--tRNA ligase                                     | CZ | -0.38555 | 0.173323 | b |
| Glutamine--tRNA ligase                                     | DZ | -0.76463 | 0.109365 | b |
| Glutamine--tRNA ligase                                     | EZ | -0.67959 | 0.206309 | b |
| Glutathione peroxidase                                     | AZ | 0.837249 | 0.101346 | a |
| Glutathione peroxidase                                     | BZ | 0.946523 | 0.03192  | a |
| Glutathione peroxidase                                     | CZ | -0.40272 | 0.196493 | b |
| Glutathione peroxidase                                     | DZ | -0.77642 | 0.106778 | b |
| Glutathione peroxidase                                     | EZ | -0.60463 | 0.20573  | b |
| Glutathione synthase                                       | AZ | 0.818437 | 0.121571 | a |
| Glutathione synthase                                       | BZ | 0.927729 | 0.042981 | a |
| Glutathione synthase                                       | CZ | -0.36716 | 0.160245 | b |
| Glutathione synthase                                       | DZ | -0.90335 | 0.110629 | b |
| Glutathione synthase                                       | EZ | -0.47566 | 0.223775 | b |
| Glutathione transferase                                    | AZ | 0.753181 | 0.066262 | a |
| Glutathione transferase                                    | BZ | 0.824104 | 0.036157 | a |
| Glutathione transferase                                    | CZ | -0.55059 | 0.263303 | b |
| Glutathione transferase                                    | DZ | -0.43061 | 0.161623 | b |
| Glutathione transferase                                    | EZ | -0.59609 | 0.185297 | b |
| Gly-Xaa carboxypeptidase                                   | AZ | -0.97161 | 0.162281 | b |
| Gly-Xaa carboxypeptidase                                   | BZ | -0.85201 | 0.092438 | b |
| Gly-Xaa carboxypeptidase                                   | CZ | 0.60292  | 0.130163 | a |
| Gly-Xaa carboxypeptidase                                   | DZ | 0.79761  | 0.040028 | a |

|                                             |    |          |          |    |
|---------------------------------------------|----|----------|----------|----|
| Gly-Xaa carboxypeptidase                    | EZ | 0.423092 | 0.210102 | a  |
| Glycerate 3-kinase                          | AZ | -0.94296 | 0.156996 | b  |
| Glycerate 3-kinase                          | BZ | -0.97047 | 0.105375 | b  |
| Glycerate 3-kinase                          | CZ | 0.814873 | 0.091633 | a  |
| Glycerate 3-kinase                          | DZ | 0.646209 | 0.052277 | a  |
| Glycerate 3-kinase                          | EZ | 0.45235  | 0.193024 | a  |
| Glycerate dehydrogenase                     | AZ | -0.92315 | 0.105171 | b  |
| Glycerate dehydrogenase                     | BZ | -0.99899 | 0.135507 | b  |
| Glycerate dehydrogenase                     | CZ | 0.689992 | 0.105193 | a  |
| Glycerate dehydrogenase                     | DZ | 0.59664  | 0.088575 | a  |
| Glycerate dehydrogenase                     | EZ | 0.635508 | 0.193286 | a  |
| Glycerol 2-dehydrogenase (NADP(+))          | AZ | -0.8922  | 0.087089 | b  |
| Glycerol 2-dehydrogenase (NADP(+))          | BZ | -1.11274 | 0.077012 | b  |
| Glycerol 2-dehydrogenase (NADP(+))          | CZ | 0.699928 | 0.11094  | a  |
| Glycerol 2-dehydrogenase (NADP(+))          | DZ | 0.734206 | 0.087046 | a  |
| Glycerol 2-dehydrogenase (NADP(+))          | EZ | 0.570814 | 0.192742 | a  |
| Glycerol-1-phosphatase                      | AZ | -0.90508 | 0.156097 | b  |
| Glycerol-1-phosphatase                      | BZ | -0.88246 | 0.112363 | b  |
| Glycerol-1-phosphatase                      | CZ | 0.517105 | 0.093165 | a  |
| Glycerol-1-phosphatase                      | DZ | 0.79341  | 0.07873  | a  |
| Glycerol-1-phosphatase                      | EZ | 0.47702  | 0.228064 | a  |
| Glycerol-3-phosphate 1-O-acyltransferase    | AZ | 0.852449 | 0.080906 | a  |
| Glycerol-3-phosphate 1-O-acyltransferase    | BZ | 0.914041 | 0.029837 | a  |
| Glycerol-3-phosphate 1-O-acyltransferase    | CZ | -0.4674  | 0.207567 | b  |
| Glycerol-3-phosphate 1-O-acyltransferase    | DZ | -0.71518 | 0.14645  | b  |
| Glycerol-3-phosphate 1-O-acyltransferase    | EZ | -0.58391 | 0.190737 | b  |
| Glycerol-3-phosphate dehydrogenase (NAD(+)) | AZ | 0.743484 | 0.100913 | a  |
| Glycerol-3-phosphate dehydrogenase (NAD(+)) | BZ | 0.980619 | 0.030288 | a  |
| Glycerol-3-phosphate dehydrogenase (NAD(+)) | CZ | -0.2905  | 0.160295 | b  |
| Glycerol-3-phosphate dehydrogenase (NAD(+)) | DZ | -0.65612 | 0.175523 | b  |
| Glycerol-3-phosphate dehydrogenase (NAD(+)) | EZ | -0.77748 | 0.201765 | b  |
| Glycerone kinase                            | AZ | -0.65592 | 0.183793 | bc |
| Glycerone kinase                            | BZ | -0.90112 | 0.060421 | c  |
| Glycerone kinase                            | CZ | 0.424093 | 0.180571 | ab |
| Glycerone kinase                            | DZ | 0.600098 | 0.137721 | a  |
| Glycerone kinase                            | EZ | 0.532851 | 0.218377 | a  |
| Glycerone-phosphate O-acyltransferase       | AZ | -1.10568 | 0.150598 | b  |
| Glycerone-phosphate O-acyltransferase       | BZ | -0.68077 | 0.098675 | b  |
| Glycerone-phosphate O-acyltransferase       | CZ | 0.520744 | 0.091504 | a  |
| Glycerone-phosphate O-acyltransferase       | DZ | 0.936611 | 0.062127 | a  |
| Glycerone-phosphate O-acyltransferase       | EZ | 0.329091 | 0.219583 | a  |
| Glycerophosphodiester phosphodiesterase     | AZ | 0.740755 | 0.079716 | a  |
| Glycerophosphodiester phosphodiesterase     | BZ | 0.687938 | 0.139715 | a  |
| Glycerophosphodiester phosphodiesterase     | CZ | 0.096993 | 0.183431 | ab |

|                                                  |    |          |          |    |
|--------------------------------------------------|----|----------|----------|----|
| Glycerophosphodiester phosphodiesterase          | DZ | -1.0501  | 0.145906 | c  |
| Glycerophosphodiester phosphodiesterase          | EZ | -0.47559 | 0.202917 | bc |
| Glycine amidinotransferase                       | AZ | -1.02877 | 0.15774  | b  |
| Glycine amidinotransferase                       | BZ | -0.22402 | 0.205929 | ab |
| Glycine amidinotransferase                       | CZ | 0.315487 | 0.184408 | a  |
| Glycine amidinotransferase                       | DZ | 0.814878 | 0.11712  | a  |
| Glycine amidinotransferase                       | EZ | 0.12243  | 0.175021 | ab |
| Glycine C-acetyltransferase                      | AZ | -1.02877 | 0.15774  | b  |
| Glycine C-acetyltransferase                      | BZ | -0.22402 | 0.205929 | ab |
| Glycine C-acetyltransferase                      | CZ | 0.315487 | 0.184408 | a  |
| Glycine C-acetyltransferase                      | DZ | 0.814878 | 0.11712  | a  |
| Glycine C-acetyltransferase                      | EZ | 0.12243  | 0.175021 | ab |
| Glycine dehydrogenase (aminomethyl-transferring) | AZ | 0.869089 | 0.103772 | a  |
| Glycine dehydrogenase (aminomethyl-transferring) | BZ | 0.966895 | 0.033148 | a  |
| Glycine dehydrogenase (aminomethyl-transferring) | CZ | -0.38175 | 0.173273 | b  |
| Glycine dehydrogenase (aminomethyl-transferring) | DZ | -0.7822  | 0.102128 | b  |
| Glycine dehydrogenase (aminomethyl-transferring) | EZ | -0.67203 | 0.206661 | b  |
| Glycine hydroxymethyltransferase                 | AZ | 0.879192 | 0.094096 | a  |
| Glycine hydroxymethyltransferase                 | BZ | 0.968567 | 0.027837 | a  |
| Glycine hydroxymethyltransferase                 | CZ | -0.4402  | 0.195687 | b  |
| Glycine hydroxymethyltransferase                 | DZ | -0.80937 | 0.094359 | b  |
| Glycine hydroxymethyltransferase                 | EZ | -0.59819 | 0.193092 | b  |
| Glycine--tRNA ligase                             | AZ | 0.879942 | 0.103234 | a  |
| Glycine--tRNA ligase                             | BZ | 0.954686 | 0.033673 | a  |
| Glycine--tRNA ligase                             | CZ | -0.40492 | 0.177225 | b  |
| Glycine--tRNA ligase                             | DZ | -0.78354 | 0.110004 | b  |
| Glycine--tRNA ligase                             | EZ | -0.64617 | 0.201597 | b  |
| Glycogen phosphorylase                           | AZ | 0.867368 | 0.100021 | a  |
| Glycogen phosphorylase                           | BZ | 0.958979 | 0.032277 | a  |
| Glycogen phosphorylase                           | CZ | -0.35531 | 0.16965  | b  |
| Glycogen phosphorylase                           | DZ | -0.76218 | 0.111714 | b  |
| Glycogen phosphorylase                           | EZ | -0.70886 | 0.208836 | b  |
| Glycogen(starch) synthase                        | AZ | 0.866802 | 0.103111 | a  |
| Glycogen(starch) synthase                        | BZ | 0.962972 | 0.033353 | a  |
| Glycogen(starch) synthase                        | CZ | -0.38555 | 0.173323 | b  |
| Glycogen(starch) synthase                        | DZ | -0.76463 | 0.109365 | b  |
| Glycogen(starch) synthase                        | EZ | -0.67959 | 0.206309 | b  |
| Glycogenin glucosyltransferase                   | AZ | -0.71781 | 0.171038 | bc |
| Glycogenin glucosyltransferase                   | BZ | -0.97794 | 0.045777 | c  |
| Glycogenin glucosyltransferase                   | CZ | 0.217543 | 0.12639  | ab |
| Glycogenin glucosyltransferase                   | DZ | 0.877773 | 0.127132 | a  |
| Glycogenin glucosyltransferase                   | EZ | 0.60043  | 0.209801 | a  |
| Glycosylphosphatidylinositol phospholipase D     | AZ | -0.83796 | 0.044477 | b  |
| Glycosylphosphatidylinositol phospholipase D     | BZ | -0.73318 | 0.074604 | b  |

|                                              |    |          |          |    |
|----------------------------------------------|----|----------|----------|----|
| Glycosylphosphatidylinositol phospholipase D | CZ | 0.167932 | 0.216462 | ab |
| Glycosylphosphatidylinositol phospholipase D | DZ | 0.408171 | 0.198568 | a  |
| Glycosylphosphatidylinositol phospholipase D | EZ | 0.995041 | 0.15792  | a  |
| Glycylpeptide N-tetradecanoyltransferase     | AZ | 0.860411 | 0.108978 | a  |
| Glycylpeptide N-tetradecanoyltransferase     | BZ | 0.960824 | 0.035645 | a  |
| Glycylpeptide N-tetradecanoyltransferase     | CZ | -0.42267 | 0.181424 | b  |
| Glycylpeptide N-tetradecanoyltransferase     | DZ | -0.82102 | 0.111135 | b  |
| Glycylpeptide N-tetradecanoyltransferase     | EZ | -0.57755 | 0.197735 | b  |
| Glyoxylate reductase (NADP(+))               | AZ | 0.832569 | 0.05711  | a  |
| Glyoxylate reductase (NADP(+))               | BZ | 0.911065 | 0.015591 | a  |
| Glyoxylate reductase (NADP(+))               | CZ | -0.38806 | 0.205374 | b  |
| Glyoxylate reductase (NADP(+))               | DZ | -0.55479 | 0.138285 | b  |
| Glyoxylate reductase (NADP(+))               | EZ | -0.80079 | 0.209884 | b  |
| GTP cyclohydrolase I                         | AZ | 0.502608 | 0.129286 | a  |
| GTP cyclohydrolase I                         | BZ | 0.840185 | 0.056291 | a  |
| GTP cyclohydrolase I                         | CZ | 0.264424 | 0.122944 | ab |
| GTP cyclohydrolase I                         | DZ | -0.88463 | 0.212123 | c  |
| GTP cyclohydrolase I                         | EZ | -0.72258 | 0.208201 | bc |
| GTP cyclohydrolase II                        | AZ | 0.866802 | 0.103111 | a  |
| GTP cyclohydrolase II                        | BZ | 0.962972 | 0.033353 | a  |
| GTP cyclohydrolase II                        | CZ | -0.38555 | 0.173323 | b  |
| GTP cyclohydrolase II                        | DZ | -0.76463 | 0.109365 | b  |
| GTP cyclohydrolase II                        | EZ | -0.67959 | 0.206309 | b  |
| Guanidinoacetate N-methyltransferase         | AZ | 0.864899 | 0.080376 | a  |
| Guanidinoacetate N-methyltransferase         | BZ | 0.942408 | 0.024594 | a  |
| Guanidinoacetate N-methyltransferase         | CZ | -0.56896 | 0.173898 | b  |
| Guanidinoacetate N-methyltransferase         | DZ | -0.71101 | 0.130276 | b  |
| Guanidinoacetate N-methyltransferase         | EZ | -0.52733 | 0.220333 | b  |
| Guanine deaminase                            | AZ | -0.90045 | 0.103174 | b  |
| Guanine deaminase                            | BZ | -0.93103 | 0.047377 | b  |
| Guanine deaminase                            | CZ | 0.384686 | 0.178379 | a  |
| Guanine deaminase                            | DZ | 0.867458 | 0.094841 | a  |
| Guanine deaminase                            | EZ | 0.579337 | 0.20152  | a  |
| Guanylate cyclase                            | AZ | 0.838082 | 0.03536  | a  |
| Guanylate cyclase                            | BZ | 0.880644 | 0.009228 | a  |
| Guanylate cyclase                            | CZ | -0.10081 | 0.163378 | b  |
| Guanylate cyclase                            | DZ | -0.69486 | 0.16228  | b  |
| Guanylate cyclase                            | EZ | -0.92306 | 0.210927 | b  |
| Guanylate kinase                             | AZ | 0.847386 | 0.094124 | a  |
| Guanylate kinase                             | BZ | 0.913804 | 0.036424 | a  |
| Guanylate kinase                             | CZ | -0.10731 | 0.163427 | b  |
| Guanylate kinase                             | DZ | -0.93465 | 0.10847  | b  |
| Guanylate kinase                             | EZ | -0.71923 | 0.208724 | b  |
| H(+)-transporting two-sector ATPase          | AZ | 0.871739 | 0.085301 | a  |

|                                      |    |          |          |    |
|--------------------------------------|----|----------|----------|----|
| H(+)-transporting two-sector ATPase  | BZ | 0.95201  | 0.028266 | a  |
| H(+)-transporting two-sector ATPase  | CZ | -0.44045 | 0.184047 | b  |
| H(+)-transporting two-sector ATPase  | DZ | -0.70149 | 0.124387 | b  |
| H(+)-transporting two-sector ATPase  | EZ | -0.68181 | 0.204254 | b  |
| Histidine--tRNA ligase               | AZ | 0.846183 | 0.095903 | a  |
| Histidine--tRNA ligase               | BZ | 0.918826 | 0.03666  | a  |
| Histidine--tRNA ligase               | CZ | -0.10571 | 0.159574 | b  |
| Histidine--tRNA ligase               | DZ | -0.93561 | 0.110181 | b  |
| Histidine--tRNA ligase               | EZ | -0.72368 | 0.208155 | b  |
| Histidinol dehydrogenase             | AZ | 0.754485 | 0.063259 | a  |
| Histidinol dehydrogenase             | BZ | 0.864298 | 0.029804 | a  |
| Histidinol dehydrogenase             | CZ | -0.65808 | 0.232453 | b  |
| Histidinol dehydrogenase             | DZ | -0.66221 | 0.214736 | b  |
| Histidinol dehydrogenase             | EZ | -0.2985  | 0.145317 | b  |
| Histidinol-phosphatase               | AZ | 0.86708  | 0.104723 | a  |
| Histidinol-phosphatase               | BZ | 0.96381  | 0.033726 | a  |
| Histidinol-phosphatase               | CZ | -0.40334 | 0.175711 | b  |
| Histidinol-phosphatase               | DZ | -0.77752 | 0.108906 | b  |
| Histidinol-phosphatase               | EZ | -0.65003 | 0.204046 | b  |
| Histidinol-phosphate transaminase    | AZ | 0.866802 | 0.103111 | a  |
| Histidinol-phosphate transaminase    | BZ | 0.962972 | 0.033353 | a  |
| Histidinol-phosphate transaminase    | CZ | -0.38555 | 0.173323 | b  |
| Histidinol-phosphate transaminase    | DZ | -0.76463 | 0.109365 | b  |
| Histidinol-phosphate transaminase    | EZ | -0.67959 | 0.206309 | b  |
| Histone-lysine N-methyltransferase   | AZ | 0.698396 | 0.139375 | a  |
| Histone-lysine N-methyltransferase   | BZ | 0.80603  | 0.08567  | a  |
| Histone-lysine N-methyltransferase   | CZ | 0.110542 | 0.152212 | ab |
| Histone-lysine N-methyltransferase   | DZ | -0.86805 | 0.114951 | b  |
| Histone-lysine N-methyltransferase   | EZ | -0.74692 | 0.231949 | b  |
| Holo-[acyl-carrier-protein] synthase | AZ | -0.81688 | 0.122688 | b  |
| Holo-[acyl-carrier-protein] synthase | BZ | -1.04921 | 0.162693 | b  |
| Holo-[acyl-carrier-protein] synthase | CZ | 0.720598 | 0.129473 | a  |
| Holo-[acyl-carrier-protein] synthase | DZ | 0.670313 | 0.05779  | a  |
| Holo-[acyl-carrier-protein] synthase | EZ | 0.475185 | 0.173924 | a  |
| Holocytochrome-c synthase            | AZ | 0.859762 | 0.101164 | a  |
| Holocytochrome-c synthase            | BZ | 0.932587 | 0.034701 | a  |
| Holocytochrome-c synthase            | CZ | -0.37252 | 0.176517 | b  |
| Holocytochrome-c synthase            | DZ | -0.75794 | 0.128018 | b  |
| Holocytochrome-c synthase            | EZ | -0.66189 | 0.20737  | b  |
| Homoaconitate hydratase              | AZ | 0.70283  | 0.06329  | a  |
| Homoaconitate hydratase              | BZ | 0.798983 | 0.053649 | a  |
| Homoaconitate hydratase              | CZ | 0.154516 | 0.23536  | ab |
| Homoaconitate hydratase              | DZ | -1.10737 | 0.121496 | c  |
| Homoaconitate hydratase              | EZ | -0.54896 | 0.169613 | bc |



|                                      |    |          |          |    |
|--------------------------------------|----|----------|----------|----|
| Homocysteine S-methyltransferase     | AZ | 0.764268 | 0.075362 | ab |
| Homocysteine S-methyltransferase     | BZ | 0.965279 | 0.012897 | a  |
| Homocysteine S-methyltransferase     | CZ | -0.1681  | 0.148288 | bc |
| Homocysteine S-methyltransferase     | DZ | -0.75501 | 0.174565 | c  |
| Homocysteine S-methyltransferase     | EZ | -0.80643 | 0.208486 | c  |
| Homogentisate 1,2-dioxygenase        | AZ | -0.76467 | 0.04718  | b  |
| Homogentisate 1,2-dioxygenase        | BZ | -0.7675  | 0.014576 | b  |
| Homogentisate 1,2-dioxygenase        | CZ | 0.328994 | 0.27445  | ab |
| Homogentisate 1,2-dioxygenase        | DZ | 0.595655 | 0.139864 | a  |
| Homogentisate 1,2-dioxygenase        | EZ | 0.60752  | 0.205868 | a  |
| Homoisocitrate dehydrogenase         | AZ | 0.680118 | 0.124564 | a  |
| Homoisocitrate dehydrogenase         | BZ | 0.915172 | 0.042369 | a  |
| Homoisocitrate dehydrogenase         | CZ | -0.46851 | 0.199321 | b  |
| Homoisocitrate dehydrogenase         | DZ | -0.71011 | 0.183558 | b  |
| Homoisocitrate dehydrogenase         | EZ | -0.41668 | 0.198476 | b  |
| Homoserine dehydrogenase             | AZ | 0.848623 | 0.10933  | a  |
| Homoserine dehydrogenase             | BZ | 0.947227 | 0.035437 | a  |
| Homoserine dehydrogenase             | CZ | -0.40044 | 0.169118 | b  |
| Homoserine dehydrogenase             | DZ | -0.72964 | 0.137083 | b  |
| Homoserine dehydrogenase             | EZ | -0.66577 | 0.204278 | b  |
| Homoserine kinase                    | AZ | 0.850086 | 0.086086 | a  |
| Homoserine kinase                    | BZ | 0.904289 | 0.032431 | a  |
| Homoserine kinase                    | CZ | -0.30946 | 0.173493 | b  |
| Homoserine kinase                    | DZ | -0.62731 | 0.090667 | b  |
| Homoserine kinase                    | EZ | -0.81761 | 0.241474 | b  |
| Homoserine O-acetyltransferase       | AZ | 0.583458 | 0.080044 | a  |
| Homoserine O-acetyltransferase       | BZ | 0.575154 | 0.067483 | a  |
| Homoserine O-acetyltransferase       | CZ | 0.642803 | 0.164972 | a  |
| Homoserine O-acetyltransferase       | DZ | -1.05372 | 0.120574 | b  |
| Homoserine O-acetyltransferase       | EZ | -0.74769 | 0.2227   | b  |
| Hydroxyacid-oxoacid transhydrogenase | AZ | -0.90841 | 0.123826 | b  |
| Hydroxyacid-oxoacid transhydrogenase | BZ | -0.94353 | 0.150452 | b  |
| Hydroxyacid-oxoacid transhydrogenase | CZ | 0.638575 | 0.123957 | a  |
| Hydroxyacid-oxoacid transhydrogenase | DZ | 0.709598 | 0.079418 | a  |
| Hydroxyacid-oxoacid transhydrogenase | EZ | 0.503772 | 0.190606 | a  |
| Hydroxyacylglutathione hydrolase     | AZ | 0.848957 | 0.094514 | a  |
| Hydroxyacylglutathione hydrolase     | BZ | 0.961106 | 0.026955 | a  |
| Hydroxyacylglutathione hydrolase     | CZ | -0.37061 | 0.167907 | b  |
| Hydroxyacylglutathione hydrolase     | DZ | -0.58017 | 0.095068 | b  |
| Hydroxyacylglutathione hydrolase     | EZ | -0.85929 | 0.224212 | b  |
| Hydroxymethylglutaryl-CoA lyase      | AZ | 0.766342 | 0.142327 | ab |
| Hydroxymethylglutaryl-CoA lyase      | BZ | 0.840507 | 0.057434 | a  |
| Hydroxymethylglutaryl-CoA lyase      | CZ | -0.22289 | 0.201637 | bc |
| Hydroxymethylglutaryl-CoA lyase      | DZ | -0.97595 | 0.125913 | c  |

|                                             |    |          |          |     |
|---------------------------------------------|----|----------|----------|-----|
| Hydroxymethylglutaryl-CoA lyase             | EZ | -0.40801 | 0.191871 | c   |
| Hydroxymethylglutaryl-CoA reductase (NADPH) | AZ | 0.713162 | 0.124354 | a   |
| Hydroxymethylglutaryl-CoA reductase (NADPH) | BZ | 0.919731 | 0.040759 | a   |
| Hydroxymethylglutaryl-CoA reductase (NADPH) | CZ | -0.58558 | 0.21331  | b   |
| Hydroxymethylglutaryl-CoA reductase (NADPH) | DZ | -0.5458  | 0.143556 | b   |
| Hydroxymethylglutaryl-CoA reductase (NADPH) | EZ | -0.50151 | 0.21077  | b   |
| Hydroxyquinol 1,2-dioxygenase               | AZ | -0.90489 | 0.158492 | b   |
| Hydroxyquinol 1,2-dioxygenase               | BZ | -0.92398 | 0.085344 | b   |
| Hydroxyquinol 1,2-dioxygenase               | CZ | 0.505369 | 0.112323 | a   |
| Hydroxyquinol 1,2-dioxygenase               | DZ | 0.872448 | 0.032484 | a   |
| Hydroxyquinol 1,2-dioxygenase               | EZ | 0.451061 | 0.222025 | a   |
| Hypoxanthine phosphoribosyltransferase      | AZ | 0.835083 | 0.040204 | a   |
| Hypoxanthine phosphoribosyltransferase      | BZ | 0.883621 | 0.010458 | a   |
| Hypoxanthine phosphoribosyltransferase      | CZ | -0.14654 | 0.161629 | b   |
| Hypoxanthine phosphoribosyltransferase      | DZ | -0.73186 | 0.183458 | b   |
| Hypoxanthine phosphoribosyltransferase      | EZ | -0.8403  | 0.203534 | b   |
| IgA-specific metalloendopeptidase           | AZ | -0.87422 | 0.120872 | b   |
| IgA-specific metalloendopeptidase           | BZ | -0.93975 | 0.172442 | b   |
| IgA-specific metalloendopeptidase           | CZ | 0.653094 | 0.124925 | a   |
| IgA-specific metalloendopeptidase           | DZ | 0.610103 | 0.097405 | a   |
| IgA-specific metalloendopeptidase           | EZ | 0.550776 | 0.181891 | a   |
| Imidazoleglycerol-phosphate dehydratase     | AZ | 0.762753 | 0.082782 | a   |
| Imidazoleglycerol-phosphate dehydratase     | BZ | 0.870541 | 0.02466  | a   |
| Imidazoleglycerol-phosphate dehydratase     | CZ | -0.12155 | 0.13245  | ab  |
| Imidazoleglycerol-phosphate dehydratase     | DZ | -0.68041 | 0.178758 | b   |
| Imidazoleglycerol-phosphate dehydratase     | EZ | -0.83133 | 0.240037 | b   |
| Inorganic diphosphatase                     | AZ | -0.77736 | 0.026757 | c   |
| Inorganic diphosphatase                     | BZ | -0.4537  | 0.118564 | bc  |
| Inorganic diphosphatase                     | CZ | 0.556349 | 0.199015 | ab  |
| Inorganic diphosphatase                     | DZ | 0.853477 | 0.209573 | a   |
| Inorganic diphosphatase                     | EZ | -0.17876 | 0.218396 | abc |
| Inositol 2-dehydrogenase                    | AZ | -0.96295 | 0.171554 | c   |
| Inositol 2-dehydrogenase                    | BZ | -0.65356 | 0.121085 | bc  |
| Inositol 2-dehydrogenase                    | CZ | 0.592974 | 0.173922 | a   |
| Inositol 2-dehydrogenase                    | DZ | 0.665423 | 0.031416 | a   |
| Inositol 2-dehydrogenase                    | EZ | 0.358119 | 0.225428 | ab  |
| Inositol 3-alpha-galactosyltransferase      | AZ | -0.92351 | 0.121566 | b   |
| Inositol 3-alpha-galactosyltransferase      | BZ | -0.94531 | 0.145981 | b   |
| Inositol 3-alpha-galactosyltransferase      | CZ | 0.630319 | 0.118958 | a   |
| Inositol 3-alpha-galactosyltransferase      | DZ | 0.757608 | 0.08183  | a   |
| Inositol 3-alpha-galactosyltransferase      | EZ | 0.480892 | 0.188716 | a   |
| Inositol oxygenase                          | AZ | -0.97914 | 0.158775 | b   |
| Inositol oxygenase                          | BZ | -0.83835 | 0.093389 | b   |
| Inositol oxygenase                          | CZ | 0.561252 | 0.110448 | a   |

|                                      |    |          |          |    |
|--------------------------------------|----|----------|----------|----|
| Inositol oxygenase                   | DZ | 0.833681 | 0.04264  | a  |
| Inositol oxygenase                   | EZ | 0.422555 | 0.222589 | a  |
| Inositol-3-phosphate synthase        | AZ | 0.866506 | 0.102672 | a  |
| Inositol-3-phosphate synthase        | BZ | 0.962563 | 0.033222 | a  |
| Inositol-3-phosphate synthase        | CZ | -0.38382 | 0.173331 | b  |
| Inositol-3-phosphate synthase        | DZ | -0.76722 | 0.110277 | b  |
| Inositol-3-phosphate synthase        | EZ | -0.67802 | 0.206152 | b  |
| Inositol-phosphate phosphatase       | AZ | -0.81442 | 0.13647  | b  |
| Inositol-phosphate phosphatase       | BZ | -0.94213 | 0.052202 | b  |
| Inositol-phosphate phosphatase       | CZ | 0.388457 | 0.120552 | a  |
| Inositol-phosphate phosphatase       | DZ | 0.809627 | 0.173649 | a  |
| Inositol-phosphate phosphatase       | EZ | 0.558472 | 0.201258 | a  |
| Inositol-polyphosphate 5-phosphatase | AZ | -0.78371 | 0.069997 | b  |
| Inositol-polyphosphate 5-phosphatase | BZ | -0.73838 | 0.043541 | b  |
| Inositol-polyphosphate 5-phosphatase | CZ | 0.210094 | 0.184282 | ab |
| Inositol-polyphosphate 5-phosphatase | DZ | 0.870315 | 0.236884 | a  |
| Inositol-polyphosphate 5-phosphatase | EZ | 0.441681 | 0.187955 | a  |
| Insulysin                            | AZ | 0.863141 | 0.082482 | a  |
| Insulysin                            | BZ | 0.973343 | 0.023398 | a  |
| Insulysin                            | CZ | -0.39336 | 0.172294 | b  |
| Insulysin                            | DZ | -0.66787 | 0.121765 | b  |
| Insulysin                            | EZ | -0.77526 | 0.208391 | b  |
| Isocitrate dehydrogenase (NAD(+))    | AZ | 0.814465 | 0.10194  | a  |
| Isocitrate dehydrogenase (NAD(+))    | BZ | 0.980395 | 0.023461 | a  |
| Isocitrate dehydrogenase (NAD(+))    | CZ | -0.35429 | 0.165675 | b  |
| Isocitrate dehydrogenase (NAD(+))    | DZ | -0.70955 | 0.139457 | b  |
| Isocitrate dehydrogenase (NAD(+))    | EZ | -0.73102 | 0.2068   | b  |
| Isocitrate dehydrogenase (NADP(+))   | AZ | 0.863637 | 0.102324 | a  |
| Isocitrate dehydrogenase (NADP(+))   | BZ | 0.958034 | 0.033545 | a  |
| Isocitrate dehydrogenase (NADP(+))   | CZ | -0.38893 | 0.173283 | b  |
| Isocitrate dehydrogenase (NADP(+))   | DZ | -0.74616 | 0.11751  | b  |
| Isocitrate dehydrogenase (NADP(+))   | EZ | -0.68658 | 0.205945 | b  |
| Isocitrate lyase                     | AZ | -0.88237 | 0.104643 | b  |
| Isocitrate lyase                     | BZ | -0.96915 | 0.045289 | b  |
| Isocitrate lyase                     | CZ | 0.40893  | 0.168197 | a  |
| Isocitrate lyase                     | DZ | 0.765374 | 0.099571 | a  |
| Isocitrate lyase                     | EZ | 0.67722  | 0.205718 | a  |
| Isoleucine--tRNA ligase              | AZ | -0.88711 | 0.102329 | b  |
| Isoleucine--tRNA ligase              | BZ | -0.96993 | 0.044881 | b  |
| Isoleucine--tRNA ligase              | CZ | 0.398805 | 0.171346 | a  |
| Isoleucine--tRNA ligase              | DZ | 0.872193 | 0.101672 | a  |
| Isoleucine--tRNA ligase              | EZ | 0.586039 | 0.195631 | a  |
| isomerase                            | AZ | 0.866802 | 0.103111 | a  |
| isomerase                            | BZ | 0.962972 | 0.033353 | a  |

|                                         |    |          |          |    |
|-----------------------------------------|----|----------|----------|----|
| isomerase                               | CZ | -0.38555 | 0.173323 | b  |
| isomerase                               | DZ | -0.76463 | 0.109365 | b  |
| isomerase                               | EZ | -0.67959 | 0.206309 | b  |
| Isopentenyl-diphosphate Delta-isomerase | AZ | 0.866802 | 0.103111 | a  |
| Isopentenyl-diphosphate Delta-isomerase | BZ | 0.962972 | 0.033353 | a  |
| Isopentenyl-diphosphate Delta-isomerase | CZ | -0.38555 | 0.173323 | b  |
| Isopentenyl-diphosphate Delta-isomerase | DZ | -0.76463 | 0.109365 | b  |
| Isopentenyl-diphosphate Delta-isomerase | EZ | -0.67959 | 0.206309 | b  |
| Kanamycin kinase                        | AZ | -0.56855 | 0.054568 | bc |
| Kanamycin kinase                        | BZ | -0.98743 | 0.147652 | c  |
| Kanamycin kinase                        | CZ | 0.558435 | 0.029317 | a  |
| Kanamycin kinase                        | DZ | 0.079358 | 0.257277 | ab |
| Kanamycin kinase                        | EZ | 0.918183 | 0.158736 | a  |
| Ketohexokinase                          | AZ | -1.07283 | 0.153018 | b  |
| Ketohexokinase                          | BZ | -0.81885 | 0.072479 | b  |
| Ketohexokinase                          | CZ | 0.582827 | 0.083985 | a  |
| Ketohexokinase                          | DZ | 0.893941 | 0.046879 | a  |
| Ketohexokinase                          | EZ | 0.414906 | 0.213212 | a  |
| Ketol-acid reductoisomerase (NADP(+))   | AZ | 0.867261 | 0.104825 | a  |
| Ketol-acid reductoisomerase (NADP(+))   | BZ | 0.965196 | 0.034063 | a  |
| Ketol-acid reductoisomerase (NADP(+))   | CZ | -0.38819 | 0.171743 | b  |
| Ketol-acid reductoisomerase (NADP(+))   | DZ | -0.79403 | 0.111076 | b  |
| Ketol-acid reductoisomerase (NADP(+))   | EZ | -0.65024 | 0.204038 | b  |
| Kexin                                   | AZ | 0.866305 | 0.103175 | a  |
| Kexin                                   | BZ | 0.962465 | 0.03336  | a  |
| Kexin                                   | CZ | -0.38194 | 0.173266 | b  |
| Kexin                                   | DZ | -0.76601 | 0.109416 | b  |
| Kexin                                   | EZ | -0.68082 | 0.206397 | b  |
| Kynurenine 3-monooxygenase              | AZ | -0.82065 | 0.138128 | b  |
| Kynurenine 3-monooxygenase              | BZ | -0.92276 | 0.056226 | b  |
| Kynurenine 3-monooxygenase              | CZ | 0.277741 | 0.136488 | a  |
| Kynurenine 3-monooxygenase              | DZ | 0.92687  | 0.14067  | a  |
| Kynurenine 3-monooxygenase              | EZ | 0.538803 | 0.20437  | a  |
| Kynurenine--oxoglutarate transaminase   | AZ | -0.93179 | 0.116355 | b  |
| Kynurenine--oxoglutarate transaminase   | BZ | -0.97333 | 0.141017 | b  |
| Kynurenine--oxoglutarate transaminase   | CZ | 0.620966 | 0.106981 | a  |
| Kynurenine--oxoglutarate transaminase   | DZ | 0.723584 | 0.077079 | a  |
| Kynurenine--oxoglutarate transaminase   | EZ | 0.560573 | 0.192973 | a  |
| L-2-hydroxyglutarate dehydrogenase      | AZ | -0.89841 | 0.105653 | b  |
| L-2-hydroxyglutarate dehydrogenase      | BZ | -1.07924 | 0.085318 | b  |
| L-2-hydroxyglutarate dehydrogenase      | CZ | 0.691622 | 0.107711 | a  |
| L-2-hydroxyglutarate dehydrogenase      | DZ | 0.656412 | 0.098499 | a  |
| L-2-hydroxyglutarate dehydrogenase      | EZ | 0.629612 | 0.190731 | a  |
| L-amino-acid oxidase                    | AZ | -0.96289 | 0.116594 | b  |

|                                           |    |          |          |    |
|-------------------------------------------|----|----------|----------|----|
| L-amino-acid oxidase                      | BZ | -0.91295 | 0.152111 | b  |
| L-amino-acid oxidase                      | CZ | 0.67106  | 0.090439 | a  |
| L-amino-acid oxidase                      | DZ | 0.526675 | 0.072801 | a  |
| L-amino-acid oxidase                      | EZ | 0.678098 | 0.205868 | a  |
| L-aminoadipate-semialdehyde dehydrogenase | AZ | -0.92299 | 0.122024 | b  |
| L-aminoadipate-semialdehyde dehydrogenase | BZ | -0.908   | 0.075158 | b  |
| L-aminoadipate-semialdehyde dehydrogenase | CZ | 0.379929 | 0.159509 | a  |
| L-aminoadipate-semialdehyde dehydrogenase | DZ | 0.957793 | 0.076376 | a  |
| L-aminoadipate-semialdehyde dehydrogenase | EZ | 0.49327  | 0.197774 | a  |
| L-arabinose isomerase                     | AZ | -0.88564 | 0.147881 | b  |
| L-arabinose isomerase                     | BZ | -0.92246 | 0.071505 | b  |
| L-arabinose isomerase                     | CZ | 0.465933 | 0.15234  | a  |
| L-arabinose isomerase                     | DZ | 0.778966 | 0.075426 | a  |
| L-arabinose isomerase                     | EZ | 0.563202 | 0.212846 | a  |
| L-ascorbate oxidase                       | AZ | -0.91297 | 0.146497 | b  |
| L-ascorbate oxidase                       | BZ | -0.94114 | 0.096227 | b  |
| L-ascorbate oxidase                       | CZ | 0.621916 | 0.095824 | a  |
| L-ascorbate oxidase                       | DZ | 0.7878   | 0.068405 | a  |
| L-ascorbate oxidase                       | EZ | 0.444401 | 0.221831 | a  |
| L-ascorbate peroxidase                    | AZ | -0.8802  | 0.18055  | b  |
| L-ascorbate peroxidase                    | BZ | -0.90346 | 0.099711 | b  |
| L-ascorbate peroxidase                    | CZ | 0.526333 | 0.095779 | a  |
| L-ascorbate peroxidase                    | DZ | 0.832041 | 0.054541 | a  |
| L-ascorbate peroxidase                    | EZ | 0.425292 | 0.219662 | a  |
| L-fucose-phosphate aldolase               | AZ | -0.88483 | 0.169957 | b  |
| L-fucose-phosphate aldolase               | BZ | -0.81814 | 0.108604 | b  |
| L-fucose-phosphate aldolase               | CZ | 0.478919 | 0.109697 | a  |
| L-fucose-phosphate aldolase               | DZ | 0.695007 | 0.073641 | a  |
| L-fucose-phosphate aldolase               | EZ | 0.529041 | 0.244204 | a  |
| L-gulonolactone oxidase                   | AZ | 0.816816 | 0.073282 | a  |
| L-gulonolactone oxidase                   | BZ | 0.87899  | 0.025557 | a  |
| L-gulonolactone oxidase                   | CZ | -0.11123 | 0.161028 | ab |
| L-gulonolactone oxidase                   | DZ | -0.8206  | 0.164824 | b  |
| L-gulonolactone oxidase                   | EZ | -0.76398 | 0.213115 | b  |
| L-iditol 2-dehydrogenase                  | AZ | -0.89233 | 0.13822  | b  |
| L-iditol 2-dehydrogenase                  | BZ | -0.96155 | 0.063016 | b  |
| L-iditol 2-dehydrogenase                  | CZ | 0.478347 | 0.140437 | a  |
| L-iditol 2-dehydrogenase                  | DZ | 0.782741 | 0.074807 | a  |
| L-iditol 2-dehydrogenase                  | EZ | 0.592788 | 0.214288 | a  |
| L-lactate dehydrogenase                   | AZ | 0.835331 | 0.056618 | a  |
| L-lactate dehydrogenase                   | BZ | 0.897736 | 0.015074 | a  |
| L-lactate dehydrogenase                   | CZ | -0.44808 | 0.205848 | b  |
| L-lactate dehydrogenase                   | DZ | -0.45139 | 0.137642 | b  |
| L-lactate dehydrogenase                   | EZ | -0.8336  | 0.212349 | b  |

|                                      |    |          |          |     |
|--------------------------------------|----|----------|----------|-----|
| L-lactate dehydrogenase (cytochrome) | AZ | -0.86875 | 0.132781 | b   |
| L-lactate dehydrogenase (cytochrome) | BZ | -1.00209 | 0.050468 | b   |
| L-lactate dehydrogenase (cytochrome) | CZ | 0.534386 | 0.150581 | a   |
| L-lactate dehydrogenase (cytochrome) | DZ | 0.755237 | 0.085508 | a   |
| L-lactate dehydrogenase (cytochrome) | EZ | 0.581222 | 0.20543  | a   |
| L-rhamnonate dehydratase             | AZ | -0.90841 | 0.123829 | b   |
| L-rhamnonate dehydratase             | BZ | -0.94353 | 0.150456 | b   |
| L-rhamnonate dehydratase             | CZ | 0.638615 | 0.12396  | a   |
| L-rhamnonate dehydratase             | DZ | 0.709639 | 0.07942  | a   |
| L-rhamnonate dehydratase             | EZ | 0.50368  | 0.190599 | a   |
| L-rhamnose 1-dehydrogenase           | AZ | -0.91262 | 0.107057 | b   |
| L-rhamnose 1-dehydrogenase           | BZ | -0.99384 | 0.155067 | b   |
| L-rhamnose 1-dehydrogenase           | CZ | 0.640599 | 0.093949 | a   |
| L-rhamnose 1-dehydrogenase           | DZ | 0.562243 | 0.077814 | a   |
| L-rhamnose 1-dehydrogenase           | EZ | 0.703613 | 0.193661 | a   |
| L-threonine 3-dehydrogenase          | AZ | -0.90214 | 0.14682  | b   |
| L-threonine 3-dehydrogenase          | BZ | -0.92798 | 0.094258 | b   |
| L-threonine 3-dehydrogenase          | CZ | 0.611383 | 0.104293 | a   |
| L-threonine 3-dehydrogenase          | DZ | 0.770964 | 0.050746 | a   |
| L-threonine 3-dehydrogenase          | EZ | 0.447769 | 0.232215 | a   |
| L-xylulose reductase                 | AZ | -0.58227 | 0.053901 | bc  |
| L-xylulose reductase                 | BZ | -0.99602 | 0.145848 | c   |
| L-xylulose reductase                 | CZ | 0.626391 | 0.015944 | a   |
| L-xylulose reductase                 | DZ | 0.062576 | 0.254921 | ab  |
| L-xylulose reductase                 | EZ | 0.889319 | 0.157069 | a   |
| Laccase                              | AZ | -0.79613 | 0.166727 | b   |
| Laccase                              | BZ | -0.95413 | 0.118635 | b   |
| Laccase                              | CZ | 0.51738  | 0.115006 | a   |
| Laccase                              | DZ | 0.722328 | 0.052939 | a   |
| Laccase                              | EZ | 0.51055  | 0.228877 | a   |
| Lactate 2-monooxygenase              | AZ | -0.90574 | 0.108949 | b   |
| Lactate 2-monooxygenase              | BZ | -0.9889  | 0.141027 | b   |
| Lactate 2-monooxygenase              | CZ | 0.698441 | 0.115014 | a   |
| Lactate 2-monooxygenase              | DZ | 0.614684 | 0.096876 | a   |
| Lactate 2-monooxygenase              | EZ | 0.581517 | 0.188475 | a   |
| Lactoylglutathione lyase             | AZ | -0.82744 | 0.024913 | c   |
| Lactoylglutathione lyase             | BZ | -0.57541 | 0.062442 | bc  |
| Lactoylglutathione lyase             | CZ | 0.84655  | 0.239566 | a   |
| Lactoylglutathione lyase             | DZ | 0.446056 | 0.153438 | ab  |
| Lactoylglutathione lyase             | EZ | 0.110241 | 0.239519 | abc |
| Lanosterol synthase                  | AZ | 0.816724 | 0.075452 | a   |
| Lanosterol synthase                  | BZ | 0.9721   | 0.039344 | a   |
| Lanosterol synthase                  | CZ | -0.32409 | 0.165026 | b   |
| Lanosterol synthase                  | DZ | -0.67547 | 0.153211 | b   |

|                                   |    |          |          |    |
|-----------------------------------|----|----------|----------|----|
| Lanosterol synthase               | EZ | -0.78926 | 0.205524 | b  |
| Leucine--tRNA ligase              | AZ | 0.787016 | 0.1364   | a  |
| Leucine--tRNA ligase              | BZ | 0.977418 | 0.034404 | a  |
| Leucine--tRNA ligase              | CZ | -0.43569 | 0.193962 | b  |
| Leucine--tRNA ligase              | DZ | -0.71738 | 0.100598 | b  |
| Leucine--tRNA ligase              | EZ | -0.61136 | 0.199555 | b  |
| Leucyl aminopeptidase             | AZ | 0.829356 | 0.056454 | a  |
| Leucyl aminopeptidase             | BZ | 0.891443 | 0.016657 | a  |
| Leucyl aminopeptidase             | CZ | -0.10452 | 0.146064 | b  |
| Leucyl aminopeptidase             | DZ | -0.68794 | 0.163947 | b  |
| Leucyl aminopeptidase             | EZ | -0.92834 | 0.216557 | b  |
| Leukotriene-A(4) hydrolase        | AZ | 0.8673   | 0.104805 | a  |
| Leukotriene-A(4) hydrolase        | BZ | 0.965083 | 0.034072 | a  |
| Leukotriene-A(4) hydrolase        | CZ | -0.38881 | 0.171913 | b  |
| Leukotriene-A(4) hydrolase        | DZ | -0.79366 | 0.111054 | b  |
| Leukotriene-A(4) hydrolase        | EZ | -0.64991 | 0.203998 | b  |
| Levanase                          | AZ | -0.63547 | 0.05723  | b  |
| Levanase                          | BZ | -1.36193 | 0.135788 | c  |
| Levanase                          | CZ | 0.733389 | 0.094361 | a  |
| Levanase                          | DZ | 0.614078 | 0.094694 | a  |
| Levanase                          | EZ | 0.649931 | 0.143575 | a  |
| Licheninase                       | AZ | -0.86112 | 0.127684 | b  |
| Licheninase                       | BZ | -0.93957 | 0.054852 | b  |
| Licheninase                       | CZ | 0.33023  | 0.14056  | a  |
| Licheninase                       | DZ | 0.854321 | 0.119021 | a  |
| Licheninase                       | EZ | 0.616145 | 0.211236 | a  |
| Long-chain-alcohol oxidase        | AZ | -0.90825 | 0.123915 | b  |
| Long-chain-alcohol oxidase        | BZ | -0.9434  | 0.150561 | b  |
| Long-chain-alcohol oxidase        | CZ | 0.639849 | 0.124046 | a  |
| Long-chain-alcohol oxidase        | DZ | 0.709765 | 0.079869 | a  |
| Long-chain-alcohol oxidase        | EZ | 0.502036 | 0.190272 | a  |
| Long-chain-fatty-acid--CoA ligase | AZ | 0.764235 | 0.104542 | a  |
| Long-chain-fatty-acid--CoA ligase | BZ | 0.947359 | 0.046065 | a  |
| Long-chain-fatty-acid--CoA ligase | CZ | -0.46494 | 0.190881 | b  |
| Long-chain-fatty-acid--CoA ligase | DZ | -0.44072 | 0.099543 | b  |
| Long-chain-fatty-acid--CoA ligase | EZ | -0.80593 | 0.231367 | b  |
| Lysine 2,3-aminomutase            | AZ | -0.87941 | 0.134089 | b  |
| Lysine 2,3-aminomutase            | BZ | -0.38624 | 0.146626 | b  |
| Lysine 2,3-aminomutase            | CZ | 0.273466 | 0.184423 | ab |
| Lysine 2,3-aminomutase            | DZ | 0.115406 | 0.155456 | ab |
| Lysine 2,3-aminomutase            | EZ | 0.876778 | 0.231027 | a  |
| Lysine--tRNA ligase               | AZ | 0.872356 | 0.093393 | a  |
| Lysine--tRNA ligase               | BZ | 0.978133 | 0.024659 | a  |
| Lysine--tRNA ligase               | CZ | -0.53911 | 0.204674 | b  |

|                                                               |    |          |          |    |
|---------------------------------------------------------------|----|----------|----------|----|
| Lysine--tRNA ligase                                           | DZ | -0.7395  | 0.0945   | b  |
| Lysine--tRNA ligase                                           | EZ | -0.57187 | 0.189032 | b  |
| Lysophospholipase                                             | AZ | -0.87467 | 0.125036 | b  |
| Lysophospholipase                                             | BZ | -0.988   | 0.048741 | b  |
| Lysophospholipase                                             | CZ | 0.49879  | 0.158211 | a  |
| Lysophospholipase                                             | DZ | 0.802268 | 0.095393 | a  |
| Lysophospholipase                                             | EZ | 0.561608 | 0.20102  | a  |
| Lysosomal Pro-Xaa carboxypeptidase                            | AZ | -1.10011 | 0.155997 | c  |
| Lysosomal Pro-Xaa carboxypeptidase                            | BZ | -0.50578 | 0.114711 | bc |
| Lysosomal Pro-Xaa carboxypeptidase                            | CZ | 0.222494 | 0.12128  | ab |
| Lysosomal Pro-Xaa carboxypeptidase                            | DZ | 1.068699 | 0.0831   | a  |
| Lysosomal Pro-Xaa carboxypeptidase                            | EZ | 0.314689 | 0.207503 | ab |
| Lysozyme                                                      | AZ | -0.72824 | 0.069862 | b  |
| Lysozyme                                                      | BZ | -0.77056 | 0.071886 | b  |
| Lysozyme                                                      | CZ | 0.61804  | 0.033576 | a  |
| Lysozyme                                                      | DZ | -0.03068 | 0.280935 | ab |
| Lysozyme                                                      | EZ | 0.911445 | 0.181693 | a  |
| Malate dehydrogenase (oxaloacetate-decarboxylating)           | AZ | 0.874139 | 0.07087  | a  |
| Malate dehydrogenase (oxaloacetate-decarboxylating)           | BZ | 0.951658 | 0.019632 | a  |
| Malate dehydrogenase (oxaloacetate-decarboxylating)           | CZ | -0.4211  | 0.214259 | b  |
| Malate dehydrogenase (oxaloacetate-decarboxylating)           | DZ | -0.79528 | 0.106409 | b  |
| Malate dehydrogenase (oxaloacetate-decarboxylating)           | EZ | -0.60941 | 0.186586 | b  |
| Malate dehydrogenase (oxaloacetate-decarboxylating) (NADP(+)) | AZ | -0.93309 | 0.153607 | b  |
| Malate dehydrogenase (oxaloacetate-decarboxylating) (NADP(+)) | BZ | -0.91404 | 0.092675 | b  |
| Malate dehydrogenase (oxaloacetate-decarboxylating) (NADP(+)) | CZ | 0.544251 | 0.105521 | a  |
| Malate dehydrogenase (oxaloacetate-decarboxylating) (NADP(+)) | DZ | 0.833128 | 0.051043 | a  |
| Malate dehydrogenase (oxaloacetate-decarboxylating) (NADP(+)) | EZ | 0.469751 | 0.219593 | a  |
| Maleylacetoacetate isomerase                                  | AZ | 0.803006 | 0.075845 | a  |
| Maleylacetoacetate isomerase                                  | BZ | 0.889531 | 0.020849 | a  |
| Maleylacetoacetate isomerase                                  | CZ | -0.30794 | 0.18419  | b  |
| Maleylacetoacetate isomerase                                  | DZ | -0.86002 | 0.194105 | b  |
| Maleylacetoacetate isomerase                                  | EZ | -0.52457 | 0.186879 | b  |
| Malonyl-CoA decarboxylase                                     | AZ | 0.835083 | 0.040204 | a  |
| Malonyl-CoA decarboxylase                                     | BZ | 0.883621 | 0.010458 | a  |
| Malonyl-CoA decarboxylase                                     | CZ | -0.14654 | 0.161629 | b  |
| Malonyl-CoA decarboxylase                                     | DZ | -0.73186 | 0.183458 | b  |
| Malonyl-CoA decarboxylase                                     | EZ | -0.8403  | 0.203534 | b  |
| Maltose O-acetyltransferase                                   | AZ | -0.40138 | 0.107781 | ab |
| Maltose O-acetyltransferase                                   | BZ | -0.99485 | 0.104069 | b  |
| Maltose O-acetyltransferase                                   | CZ | 0.275518 | 0.114317 | a  |
| Maltose O-acetyltransferase                                   | DZ | 0.542859 | 0.290228 | a  |
| Maltose O-acetyltransferase                                   | EZ | 0.577851 | 0.165784 | a  |
| Mannan endo-1,4-beta-mannosidase                              | AZ | -0.96894 | 0.083718 | b  |
| Mannan endo-1,4-beta-mannosidase                              | BZ | -1.08614 | 0.066436 | b  |



|                                                |    |          |          |    |
|------------------------------------------------|----|----------|----------|----|
| Mannan endo-1,4-beta-mannosidase               | CZ | 0.696238 | 0.074219 | a  |
| Mannan endo-1,4-beta-mannosidase               | DZ | 0.655821 | 0.090385 | a  |
| Mannan endo-1,4-beta-mannosidase               | EZ | 0.703022 | 0.19626  | a  |
| Mannan endo-1,6-alpha-mannosidase              | AZ | -0.90337 | 0.158498 | b  |
| Mannan endo-1,6-alpha-mannosidase              | BZ | -0.88813 | 0.098328 | b  |
| Mannan endo-1,6-alpha-mannosidase              | CZ | 0.540941 | 0.095431 | a  |
| Mannan endo-1,6-alpha-mannosidase              | DZ | 0.80791  | 0.077104 | a  |
| Mannan endo-1,6-alpha-mannosidase              | EZ | 0.442645 | 0.229896 | a  |
| Mannitol 2-dehydrogenase                       | AZ | -0.85175 | 0.088809 | b  |
| Mannitol 2-dehydrogenase                       | BZ | -1.17153 | 0.052559 | b  |
| Mannitol 2-dehydrogenase                       | CZ | 0.744356 | 0.11485  | a  |
| Mannitol 2-dehydrogenase                       | DZ | 0.664187 | 0.100404 | a  |
| Mannitol 2-dehydrogenase                       | EZ | 0.614744 | 0.180345 | a  |
| Mannitol-1-phosphate 5-dehydrogenase           | AZ | -0.88994 | 0.116957 | b  |
| Mannitol-1-phosphate 5-dehydrogenase           | BZ | -0.97131 | 0.155248 | b  |
| Mannitol-1-phosphate 5-dehydrogenase           | CZ | 0.642625 | 0.124684 | a  |
| Mannitol-1-phosphate 5-dehydrogenase           | DZ | 0.692707 | 0.083325 | a  |
| Mannitol-1-phosphate 5-dehydrogenase           | EZ | 0.525917 | 0.185711 | a  |
| Mannose-1-phosphate guanylyltransferase        | AZ | 0.892891 | 0.095873 | a  |
| Mannose-1-phosphate guanylyltransferase        | BZ | 0.984546 | 0.026433 | a  |
| Mannose-1-phosphate guanylyltransferase        | CZ | -0.46055 | 0.181688 | b  |
| Mannose-1-phosphate guanylyltransferase        | DZ | -0.82235 | 0.093869 | b  |
| Mannose-1-phosphate guanylyltransferase        | EZ | -0.59453 | 0.194593 | b  |
| Mannose-6-phosphate isomerase                  | AZ | -0.78587 | 0.137864 | b  |
| Mannose-6-phosphate isomerase                  | BZ | -0.92432 | 0.047658 | b  |
| Mannose-6-phosphate isomerase                  | CZ | 0.320073 | 0.117336 | a  |
| Mannose-6-phosphate isomerase                  | DZ | 0.889204 | 0.195878 | a  |
| Mannose-6-phosphate isomerase                  | EZ | 0.500905 | 0.189175 | a  |
| Mannosyl-oligosaccharide 1,2-alpha-mannosidase | AZ | -0.75331 | 0.140769 | b  |
| Mannosyl-oligosaccharide 1,2-alpha-mannosidase | BZ | -0.95852 | 0.049261 | b  |
| Mannosyl-oligosaccharide 1,2-alpha-mannosidase | CZ | 0.362882 | 0.136389 | a  |
| Mannosyl-oligosaccharide 1,2-alpha-mannosidase | DZ | 0.665272 | 0.160663 | a  |
| Mannosyl-oligosaccharide 1,2-alpha-mannosidase | EZ | 0.683677 | 0.216672 | a  |
| Mannosyl-oligosaccharide glucosidase           | AZ | -0.71379 | 0.145334 | b  |
| Mannosyl-oligosaccharide glucosidase           | BZ | -0.81453 | 0.054175 | b  |
| Mannosyl-oligosaccharide glucosidase           | CZ | 0.245829 | 0.107172 | ab |
| Mannosyl-oligosaccharide glucosidase           | DZ | 0.620812 | 0.184692 | a  |
| Mannosyl-oligosaccharide glucosidase           | EZ | 0.661677 | 0.259838 | a  |
| Membrane dipeptidase                           | AZ | -0.95878 | 0.165463 | b  |
| Membrane dipeptidase                           | BZ | -0.84528 | 0.096199 | b  |
| Membrane dipeptidase                           | CZ | 0.574712 | 0.110587 | a  |
| Membrane dipeptidase                           | DZ | 0.77046  | 0.050437 | a  |
| Membrane dipeptidase                           | EZ | 0.458887 | 0.224015 | a  |
| Methionine adenosyltransferase                 | AZ | 0.735541 | 0.133095 | a  |

|                                                        |    |          |          |     |
|--------------------------------------------------------|----|----------|----------|-----|
| Methionine adenosyltransferase                         | BZ | 0.949577 | 0.039107 | a   |
| Methionine adenosyltransferase                         | CZ | -0.28371 | 0.163739 | b   |
| Methionine adenosyltransferase                         | DZ | -0.65729 | 0.146881 | b   |
| Methionine adenosyltransferase                         | EZ | -0.74412 | 0.21662  | b   |
| Methionine synthase                                    | AZ | 0.835083 | 0.040204 | a   |
| Methionine synthase                                    | BZ | 0.883621 | 0.010458 | a   |
| Methionine synthase                                    | CZ | -0.14654 | 0.161629 | b   |
| Methionine synthase                                    | DZ | -0.73186 | 0.183458 | b   |
| Methionine synthase                                    | EZ | -0.8403  | 0.203534 | b   |
| Methionine--tRNA ligase                                | AZ | 0.86678  | 0.103121 | a   |
| Methionine--tRNA ligase                                | BZ | 0.963025 | 0.033349 | a   |
| Methionine--tRNA ligase                                | CZ | -0.38524 | 0.173243 | b   |
| Methionine--tRNA ligase                                | DZ | -0.7648  | 0.109375 | b   |
| Methionine--tRNA ligase                                | EZ | -0.67976 | 0.206328 | b   |
| Methionyl aminopeptidase                               | AZ | 0.774253 | 0.118975 | a   |
| Methionyl aminopeptidase                               | BZ | 0.950757 | 0.031242 | a   |
| Methionyl aminopeptidase                               | CZ | -0.31149 | 0.15179  | b   |
| Methionyl aminopeptidase                               | DZ | -0.58439 | 0.132942 | b   |
| Methionyl aminopeptidase                               | EZ | -0.82913 | 0.229533 | b   |
| Methionyl-tRNA formyltransferase                       | AZ | 0.70152  | 0.075257 | ab  |
| Methionyl-tRNA formyltransferase                       | BZ | 0.787016 | 0.021065 | a   |
| Methionyl-tRNA formyltransferase                       | CZ | -0.11762 | 0.107142 | abc |
| Methionyl-tRNA formyltransferase                       | DZ | -1.02506 | 0.295961 | c   |
| Methionyl-tRNA formyltransferase                       | EZ | -0.34586 | 0.141542 | bc  |
| Methylated-DNA--[protein]-cysteine S-methyltransferase | AZ | -0.61109 | 0.181739 | bc  |
| Methylated-DNA--[protein]-cysteine S-methyltransferase | BZ | -0.94274 | 0.17628  | c   |
| Methylated-DNA--[protein]-cysteine S-methyltransferase | CZ | 0.283737 | 0.070214 | ab  |
| Methylated-DNA--[protein]-cysteine S-methyltransferase | DZ | 0.871052 | 0.111061 | a   |
| Methylated-DNA--[protein]-cysteine S-methyltransferase | EZ | 0.399035 | 0.21354  | ab  |
| Methylcrotonoyl-CoA carboxylase                        | AZ | 0.881027 | 0.095647 | a   |
| Methylcrotonoyl-CoA carboxylase                        | BZ | 0.972267 | 0.029421 | a   |
| Methylcrotonoyl-CoA carboxylase                        | CZ | -0.34119 | 0.163498 | b   |
| Methylcrotonoyl-CoA carboxylase                        | DZ | -0.87265 | 0.117712 | b   |
| Methylcrotonoyl-CoA carboxylase                        | EZ | -0.63946 | 0.197436 | b   |
| Methylene-fatty-acyl-phospholipid synthase             | AZ | -0.89978 | 0.157162 | b   |
| Methylene-fatty-acyl-phospholipid synthase             | BZ | -0.86893 | 0.111069 | b   |
| Methylene-fatty-acyl-phospholipid synthase             | CZ | 0.632661 | 0.11099  | a   |
| Methylene-fatty-acyl-phospholipid synthase             | DZ | 0.722048 | 0.074125 | a   |
| Methylene-fatty-acyl-phospholipid synthase             | EZ | 0.414005 | 0.228621 | a   |
| Methylenetetrahydrofolate dehydrogenase (NAD(+))       | AZ | 0.866777 | 0.104822 | a   |
| Methylenetetrahydrofolate dehydrogenase (NAD(+))       | BZ | 0.964489 | 0.033905 | a   |
| Methylenetetrahydrofolate dehydrogenase (NAD(+))       | CZ | -0.40485 | 0.175879 | b   |
| Methylenetetrahydrofolate dehydrogenase (NAD(+))       | DZ | -0.77899 | 0.109166 | b   |
| Methylenetetrahydrofolate dehydrogenase (NAD(+))       | EZ | -0.64743 | 0.20357  | b   |

|                                                           |    |          |          |   |
|-----------------------------------------------------------|----|----------|----------|---|
| Methylenetetrahydrofolate reductase (NAD(P)H)             | AZ | 0.866735 | 0.102996 | a |
| Methylenetetrahydrofolate reductase (NAD(P)H)             | BZ | 0.962873 | 0.033319 | a |
| Methylenetetrahydrofolate reductase (NAD(P)H)             | CZ | -0.38425 | 0.173143 | b |
| Methylenetetrahydrofolate reductase (NAD(P)H)             | DZ | -0.76726 | 0.109994 | b |
| Methylenetetrahydrofolate reductase (NAD(P)H)             | EZ | -0.6781  | 0.206105 | b |
| Methylglutaconyl-CoA hydratase                            | AZ | -1.11723 | 0.137139 | b |
| Methylglutaconyl-CoA hydratase                            | BZ | -0.66932 | 0.104588 | b |
| Methylglutaconyl-CoA hydratase                            | CZ | 0.556537 | 0.109972 | a |
| Methylglutaconyl-CoA hydratase                            | DZ | 0.725929 | 0.050054 | a |
| Methylglutaconyl-CoA hydratase                            | EZ | 0.504085 | 0.237287 | a |
| Methylisocitrate lyase                                    | AZ | -0.90156 | 0.10378  | b |
| Methylisocitrate lyase                                    | BZ | -1.02359 | 0.126349 | b |
| Methylisocitrate lyase                                    | CZ | 0.70962  | 0.115502 | a |
| Methylisocitrate lyase                                    | DZ | 0.627407 | 0.098248 | a |
| Methylisocitrate lyase                                    | EZ | 0.588118 | 0.187327 | a |
| Methylmalonate-semialdehyde dehydrogenase (CoA acylating) | AZ | 0.854874 | 0.07625  | a |
| Methylmalonate-semialdehyde dehydrogenase (CoA acylating) | BZ | 0.852271 | 0.040633 | a |
| Methylmalonate-semialdehyde dehydrogenase (CoA acylating) | CZ | -0.27936 | 0.216405 | b |
| Methylmalonate-semialdehyde dehydrogenase (CoA acylating) | DZ | -0.71674 | 0.113031 | b |
| Methylmalonate-semialdehyde dehydrogenase (CoA acylating) | EZ | -0.71104 | 0.212608 | b |
| Methylmalonyl-CoA epimerase                               | AZ | 0.835083 | 0.040204 | a |
| Methylmalonyl-CoA epimerase                               | BZ | 0.883621 | 0.010458 | a |
| Methylmalonyl-CoA epimerase                               | CZ | -0.14654 | 0.161629 | b |
| Methylmalonyl-CoA epimerase                               | DZ | -0.73186 | 0.183458 | b |
| Methylmalonyl-CoA epimerase                               | EZ | -0.8403  | 0.203534 | b |
| Methylmalonyl-CoA mutase                                  | AZ | 0.835083 | 0.040204 | a |
| Methylmalonyl-CoA mutase                                  | BZ | 0.883621 | 0.010458 | a |
| Methylmalonyl-CoA mutase                                  | CZ | -0.14654 | 0.161629 | b |
| Methylmalonyl-CoA mutase                                  | DZ | -0.73186 | 0.183458 | b |
| Methylmalonyl-CoA mutase                                  | EZ | -0.8403  | 0.203534 | b |
| Mevalonate kinase                                         | AZ | 1.018767 | 0.030493 | a |
| Mevalonate kinase                                         | BZ | 0.814277 | 0.016027 | a |
| Mevalonate kinase                                         | CZ | -0.62716 | 0.174432 | b |
| Mevalonate kinase                                         | DZ | -0.73398 | 0.141864 | b |
| Mevalonate kinase                                         | EZ | -0.4719  | 0.213254 | b |
| Micrococcal nuclease                                      | AZ | -0.90841 | 0.123829 | b |
| Micrococcal nuclease                                      | BZ | -0.94353 | 0.150456 | b |
| Micrococcal nuclease                                      | CZ | 0.638615 | 0.12396  | a |
| Micrococcal nuclease                                      | DZ | 0.709639 | 0.07942  | a |
| Micrococcal nuclease                                      | EZ | 0.50368  | 0.190599 | a |
| Microtubule-severing ATPase                               | AZ | 0.879893 | 0.077006 | a |
| Microtubule-severing ATPase                               | BZ | 0.963818 | 0.021964 | a |
| Microtubule-severing ATPase                               | CZ | -0.34996 | 0.167904 | b |
| Microtubule-severing ATPase                               | DZ | -0.75126 | 0.129414 | b |

|                                                     |    |          |          |   |
|-----------------------------------------------------|----|----------|----------|---|
| Microtubule-severing ATPase                         | EZ | -0.74249 | 0.203918 | b |
| Mitochondrial intermediate peptidase                | AZ | 0.866625 | 0.102879 | a |
| Mitochondrial intermediate peptidase                | BZ | 0.962814 | 0.033298 | a |
| Mitochondrial intermediate peptidase                | CZ | -0.38296 | 0.172958 | b |
| Mitochondrial intermediate peptidase                | DZ | -0.76988 | 0.110634 | b |
| Mitochondrial intermediate peptidase                | EZ | -0.6766  | 0.205894 | b |
| Mitochondrial processing peptidase                  | AZ | 0.846751 | 0.107196 | a |
| Mitochondrial processing peptidase                  | BZ | 0.96328  | 0.034766 | a |
| Mitochondrial processing peptidase                  | CZ | -0.29498 | 0.167294 | b |
| Mitochondrial processing peptidase                  | DZ | -0.85581 | 0.115079 | b |
| Mitochondrial processing peptidase                  | EZ | -0.65924 | 0.202791 | b |
| Molybdate-transporting ATPase                       | AZ | -0.91236 | 0.100228 | b |
| Molybdate-transporting ATPase                       | BZ | -1.02254 | 0.128381 | b |
| Molybdate-transporting ATPase                       | CZ | 0.671024 | 0.113187 | a |
| Molybdate-transporting ATPase                       | DZ | 0.67545  | 0.082503 | a |
| Molybdate-transporting ATPase                       | EZ | 0.588425 | 0.193178 | a |
| Monoamine oxidase                                   | AZ | -0.84048 | 0.154415 | b |
| Monoamine oxidase                                   | BZ | -0.97513 | 0.098057 | b |
| Monoamine oxidase                                   | CZ | 0.607599 | 0.11579  | a |
| Monoamine oxidase                                   | DZ | 0.765966 | 0.073597 | a |
| Monoamine oxidase                                   | EZ | 0.442045 | 0.217459 | a |
| Monodehydroascorbate reductase (NADH)               | AZ | -0.93671 | 0.152623 | b |
| Monodehydroascorbate reductase (NADH)               | BZ | -0.91874 | 0.094083 | b |
| Monodehydroascorbate reductase (NADH)               | CZ | 0.599474 | 0.103553 | a |
| Monodehydroascorbate reductase (NADH)               | DZ | 0.78822  | 0.050807 | a |
| Monodehydroascorbate reductase (NADH)               | EZ | 0.467755 | 0.220232 | a |
| mRNA (2'-O-methyladenosine-N(6)-)-methyltransferase | AZ | -0.89745 | 0.158608 | b |
| mRNA (2'-O-methyladenosine-N(6)-)-methyltransferase | BZ | -0.88535 | 0.099671 | b |
| mRNA (2'-O-methyladenosine-N(6)-)-methyltransferase | CZ | 0.477909 | 0.185637 | a |
| mRNA (2'-O-methyladenosine-N(6)-)-methyltransferase | DZ | 0.843023 | 0.077156 | a |
| mRNA (2'-O-methyladenosine-N(6)-)-methyltransferase | EZ | 0.461871 | 0.165563 | a |
| mRNA guanylyltransferase                            | AZ | -0.79721 | 0.116678 | b |
| mRNA guanylyltransferase                            | BZ | -0.93307 | 0.037896 | b |
| mRNA guanylyltransferase                            | CZ | 0.182516 | 0.101772 | a |
| mRNA guanylyltransferase                            | DZ | 0.833982 | 0.17428  | a |
| mRNA guanylyltransferase                            | EZ | 0.71378  | 0.216783 | a |
| Multiple inositol-polyphosphate phosphatase         | AZ | 0.835083 | 0.040204 | a |
| Multiple inositol-polyphosphate phosphatase         | BZ | 0.883621 | 0.010458 | a |
| Multiple inositol-polyphosphate phosphatase         | CZ | -0.14654 | 0.161629 | b |
| Multiple inositol-polyphosphate phosphatase         | DZ | -0.73186 | 0.183458 | b |
| Multiple inositol-polyphosphate phosphatase         | EZ | -0.8403  | 0.203534 | b |
| N-acetyl-gamma-glutamyl-phosphate reductase         | AZ | -0.76164 | 0.213396 | b |
| N-acetyl-gamma-glutamyl-phosphate reductase         | BZ | -0.66518 | 0.143851 | b |
| N-acetyl-gamma-glutamyl-phosphate reductase         | CZ | 0.792488 | 0.193741 | a |

|                                                                       |    |          |          |    |
|-----------------------------------------------------------------------|----|----------|----------|----|
| N-acetyl-gamma-glutamyl-phosphate reductase                           | DZ | 0.200582 | 0.156993 | ab |
| N-acetyl-gamma-glutamyl-phosphate reductase                           | EZ | 0.433754 | 0.132807 | ab |
| N-acetylglucosamine-6-phosphate deacetylase                           | AZ | 0.801763 | 0.062567 | a  |
| N-acetylglucosamine-6-phosphate deacetylase                           | BZ | 0.592458 | 0.030359 | a  |
| N-acetylglucosamine-6-phosphate deacetylase                           | CZ | -0.13499 | 0.196349 | ab |
| N-acetylglucosamine-6-phosphate deacetylase                           | DZ | -1.13024 | 0.213067 | b  |
| N-acetylglucosamine-6-phosphate deacetylase                           | EZ | -0.129   | 0.189491 | ab |
| N-acetylglucosamine-6-sulfatase                                       | AZ | -0.66959 | 0.245071 | bc |
| N-acetylglucosamine-6-sulfatase                                       | BZ | -0.90894 | 0.113463 | c  |
| N-acetylglucosamine-6-sulfatase                                       | CZ | 0.742316 | 0.157603 | a  |
| N-acetylglucosamine-6-sulfatase                                       | DZ | 0.543772 | 0.103486 | a  |
| N-acetylglucosamine-6-sulfatase                                       | EZ | 0.292438 | 0.145535 | ab |
| N-acetylglucosaminephosphotransferase                                 | AZ | 0.866802 | 0.103111 | a  |
| N-acetylglucosaminephosphotransferase                                 | BZ | 0.962972 | 0.033353 | a  |
| N-acetylglucosaminephosphotransferase                                 | CZ | -0.38555 | 0.173323 | b  |
| N-acetylglucosaminephosphotransferase                                 | DZ | -0.76463 | 0.109365 | b  |
| N-acetylglucosaminephosphotransferase                                 | EZ | -0.67959 | 0.206309 | b  |
| N-acetylglucosaminyldiphosphodolichol N-acetylglucosaminyltransferase | AZ | 0.868417 | 0.101955 | a  |
| N-acetylglucosaminyldiphosphodolichol N-acetylglucosaminyltransferase | BZ | 0.962537 | 0.033014 | a  |
| N-acetylglucosaminyldiphosphodolichol N-acetylglucosaminyltransferase | CZ | -0.38162 | 0.171606 | b  |
| N-acetylglucosaminyldiphosphodolichol N-acetylglucosaminyltransferase | DZ | -0.75355 | 0.108546 | b  |
| N-acetylglucosaminyldiphosphodolichol N-acetylglucosaminyltransferase | EZ | -0.69579 | 0.208264 | b  |
| N-acetylglucosaminide beta-1,3-N-acetylglucosaminyltransferase        | AZ | -1.02954 | 0.236645 | d  |
| N-acetylglucosaminide beta-1,3-N-acetylglucosaminyltransferase        | BZ | -0.67728 | 0.061079 | cd |
| N-acetylglucosaminide beta-1,3-N-acetylglucosaminyltransferase        | CZ | 0.119054 | 0.083966 | bc |
| N-acetylglucosaminide beta-1,3-N-acetylglucosaminyltransferase        | DZ | 1.101512 | 0.082576 | a  |
| N-acetylglucosaminide beta-1,3-N-acetylglucosaminyltransferase        | EZ | 0.486257 | 0.13141  | ab |
| N-acyl-aliphatic-L-amino acid amidohydrolase                          | AZ | 0.816366 | 0.04706  | a  |
| N-acyl-aliphatic-L-amino acid amidohydrolase                          | BZ | 0.876269 | 0.011401 | a  |
| N-acyl-aliphatic-L-amino acid amidohydrolase                          | CZ | -0.21134 | 0.165784 | b  |
| N-acyl-aliphatic-L-amino acid amidohydrolase                          | DZ | -0.79318 | 0.192958 | b  |
| N-acyl-aliphatic-L-amino acid amidohydrolase                          | EZ | -0.68812 | 0.209423 | b  |
| N-acylneuraminate-9-phosphatase                                       | AZ | -0.56855 | 0.054568 | bc |
| N-acylneuraminate-9-phosphatase                                       | BZ | -0.98743 | 0.147652 | c  |
| N-acylneuraminate-9-phosphatase                                       | CZ | 0.558435 | 0.029317 | a  |
| N-acylneuraminate-9-phosphatase                                       | DZ | 0.079358 | 0.257277 | ab |
| N-acylneuraminate-9-phosphatase                                       | EZ | 0.918183 | 0.158736 | a  |
| N-carbamoylputrescine amidase                                         | AZ | -1.0271  | 0.078376 | b  |
| N-carbamoylputrescine amidase                                         | BZ | -1.0011  | 0.072972 | b  |
| N-carbamoylputrescine amidase                                         | CZ | 0.490014 | 0.037098 | a  |
| N-carbamoylputrescine amidase                                         | DZ | 0.683965 | 0.098256 | a  |
| N-carbamoylputrescine amidase                                         | EZ | 0.854224 | 0.206793 | a  |
| N-sulfoglucosamine sulfohydrolase                                     | AZ | -0.81188 | 0.157477 | b  |
| N-sulfoglucosamine sulfohydrolase                                     | BZ | -1.08815 | 0.078995 | b  |

|                                                 |    |          |          |    |
|-------------------------------------------------|----|----------|----------|----|
| N-sulfoglucosamine sulfohydrolase               | CZ | 0.779984 | 0.117538 | a  |
| N-sulfoglucosamine sulfohydrolase               | DZ | 0.691439 | 0.062589 | a  |
| N-sulfoglucosamine sulfohydrolase               | EZ | 0.428605 | 0.188572 | a  |
| N(4)-(beta-N-acetylglucosaminy)-L-asparaginase  | AZ | -0.83303 | 0.176105 | b  |
| N(4)-(beta-N-acetylglucosaminy)-L-asparaginase  | BZ | -0.97862 | 0.078243 | b  |
| N(4)-(beta-N-acetylglucosaminy)-L-asparaginase  | CZ | 0.618366 | 0.101897 | a  |
| N(4)-(beta-N-acetylglucosaminy)-L-asparaginase  | DZ | 0.873354 | 0.111924 | a  |
| N(4)-(beta-N-acetylglucosaminy)-L-asparaginase  | EZ | 0.319932 | 0.187081 | a  |
| NAD(+) ADP-ribosyltransferase                   | AZ | -0.91372 | 0.110421 | b  |
| NAD(+) ADP-ribosyltransferase                   | BZ | -0.95906 | 0.058735 | b  |
| NAD(+) ADP-ribosyltransferase                   | CZ | 0.554511 | 0.154401 | a  |
| NAD(+) ADP-ribosyltransferase                   | DZ | 0.634323 | 0.093814 | a  |
| NAD(+) ADP-ribosyltransferase                   | EZ | 0.683942 | 0.212372 | a  |
| NAD(+) diphosphatase                            | AZ | 0.866082 | 0.044425 | a  |
| NAD(+) diphosphatase                            | BZ | 0.859355 | 0.020489 | a  |
| NAD(+) diphosphatase                            | CZ | -0.13694 | 0.128398 | b  |
| NAD(+) diphosphatase                            | DZ | -0.79892 | 0.187522 | b  |
| NAD(+) diphosphatase                            | EZ | -0.78958 | 0.217953 | b  |
| NAD(+) kinase                                   | AZ | 0.733598 | 0.115184 | ab |
| NAD(+) kinase                                   | BZ | 0.902883 | 0.027059 | a  |
| NAD(+) kinase                                   | CZ | -0.20403 | 0.122516 | bc |
| NAD(+) kinase                                   | DZ | -0.89014 | 0.226456 | c  |
| NAD(+) kinase                                   | EZ | -0.54231 | 0.188774 | c  |
| NAD(+) synthase (glutamine-hydrolyzing)         | AZ | 0.866802 | 0.103111 | a  |
| NAD(+) synthase (glutamine-hydrolyzing)         | BZ | 0.962972 | 0.033353 | a  |
| NAD(+) synthase (glutamine-hydrolyzing)         | CZ | -0.38555 | 0.173323 | b  |
| NAD(+) synthase (glutamine-hydrolyzing)         | DZ | -0.76463 | 0.109365 | b  |
| NAD(+) synthase (glutamine-hydrolyzing)         | EZ | -0.67959 | 0.206309 | b  |
| NAD(+)--protein-arginine ADP-ribosyltransferase | AZ | -0.86651 | 0.206282 | b  |
| NAD(+)--protein-arginine ADP-ribosyltransferase | BZ | -0.7592  | 0.142918 | b  |
| NAD(+)--protein-arginine ADP-ribosyltransferase | CZ | 0.625923 | 0.187347 | a  |
| NAD(+)--protein-arginine ADP-ribosyltransferase | DZ | 0.438991 | 0.077203 | a  |
| NAD(+)--protein-arginine ADP-ribosyltransferase | EZ | 0.560799 | 0.157009 | a  |
| NAD(P)(+) transhydrogenase (Re/Si-specific)     | AZ | -0.92507 | 0.164577 | b  |
| NAD(P)(+) transhydrogenase (Re/Si-specific)     | BZ | -0.88877 | 0.094628 | b  |
| NAD(P)(+) transhydrogenase (Re/Si-specific)     | CZ | 0.50865  | 0.09345  | a  |
| NAD(P)(+) transhydrogenase (Re/Si-specific)     | DZ | 0.870117 | 0.053652 | a  |
| NAD(P)(+) transhydrogenase (Re/Si-specific)     | EZ | 0.435072 | 0.22318  | a  |
| NAD(P)H dehydrogenase (quinone)                 | AZ | -0.88032 | 0.098633 | b  |
| NAD(P)H dehydrogenase (quinone)                 | BZ | -1.1001  | 0.083981 | b  |
| NAD(P)H dehydrogenase (quinone)                 | CZ | 0.677977 | 0.11875  | a  |
| NAD(P)H dehydrogenase (quinone)                 | DZ | 0.760211 | 0.092001 | a  |
| NAD(P)H dehydrogenase (quinone)                 | EZ | 0.542234 | 0.186585 | a  |
| NADH:ubiquinone reductase (H(+)-translocating)  | AZ | 0.836187 | 0.075227 | a  |

|                                                |    |          |          |    |
|------------------------------------------------|----|----------|----------|----|
| NADH:ubiquinone reductase (H(+)-translocating) | BZ | 0.841951 | 0.040927 | a  |
| NADH:ubiquinone reductase (H(+)-translocating) | CZ | -0.55247 | 0.225978 | b  |
| NADH:ubiquinone reductase (H(+)-translocating) | DZ | -0.37262 | 0.1318   | b  |
| NADH:ubiquinone reductase (H(+)-translocating) | EZ | -0.75305 | 0.208007 | b  |
| NADPH dehydrogenase                            | AZ | -0.91121 | 0.162861 | b  |
| NADPH dehydrogenase                            | BZ | -0.93977 | 0.093604 | b  |
| NADPH dehydrogenase                            | CZ | 0.564586 | 0.114201 | a  |
| NADPH dehydrogenase                            | DZ | 0.809704 | 0.041201 | a  |
| NADPH dehydrogenase                            | EZ | 0.476696 | 0.210286 | a  |
| NADPH--hemoprotein reductase                   | AZ | -0.94068 | 0.117858 | b  |
| NADPH--hemoprotein reductase                   | BZ | -0.86382 | 0.07644  | b  |
| NADPH--hemoprotein reductase                   | CZ | 0.462757 | 0.191943 | a  |
| NADPH--hemoprotein reductase                   | DZ | 0.973598 | 0.051839 | a  |
| NADPH--hemoprotein reductase                   | EZ | 0.368139 | 0.185219 | a  |
| NADPH:quinone reductase                        | AZ | -0.87483 | 0.13056  | b  |
| NADPH:quinone reductase                        | BZ | -0.95555 | 0.050705 | b  |
| NADPH:quinone reductase                        | CZ | 0.401722 | 0.147572 | a  |
| NADPH:quinone reductase                        | DZ | 0.820921 | 0.090068 | a  |
| NADPH:quinone reductase                        | EZ | 0.607738 | 0.21527  | a  |
| Naringenin-chalcone synthase                   | AZ | -0.79938 | 0.178171 | b  |
| Naringenin-chalcone synthase                   | BZ | -0.94792 | 0.105282 | b  |
| Naringenin-chalcone synthase                   | CZ | 0.481348 | 0.086194 | a  |
| Naringenin-chalcone synthase                   | DZ | 0.817097 | 0.124464 | a  |
| Naringenin-chalcone synthase                   | EZ | 0.448849 | 0.205748 | a  |
| Nicotianamine synthase                         | AZ | -0.76624 | 0.201062 | b  |
| Nicotianamine synthase                         | BZ | -0.83143 | 0.124281 | b  |
| Nicotianamine synthase                         | CZ | 0.22473  | 0.050898 | ab |
| Nicotianamine synthase                         | DZ | 0.919519 | 0.167204 | a  |
| Nicotianamine synthase                         | EZ | 0.453422 | 0.185957 | a  |
| Nicotinamidase                                 | AZ | -0.93311 | 0.158265 | b  |
| Nicotinamidase                                 | BZ | -0.89853 | 0.10037  | b  |
| Nicotinamidase                                 | CZ | 0.567282 | 0.106413 | a  |
| Nicotinamidase                                 | DZ | 0.808167 | 0.051339 | a  |
| Nicotinamidase                                 | EZ | 0.456191 | 0.218777 | a  |
| Nicotinamide N-methyltransferase               | AZ | -0.93281 | 0.116165 | b  |
| Nicotinamide N-methyltransferase               | BZ | -0.95056 | 0.152923 | b  |
| Nicotinamide N-methyltransferase               | CZ | 0.70452  | 0.124077 | a  |
| Nicotinamide N-methyltransferase               | DZ | 0.603836 | 0.064203 | a  |
| Nicotinamide N-methyltransferase               | EZ | 0.575016 | 0.187983 | a  |
| Nicotinamide phosphoribosyltransferase         | AZ | 0.835083 | 0.040204 | a  |
| Nicotinamide phosphoribosyltransferase         | BZ | 0.883621 | 0.010458 | a  |
| Nicotinamide phosphoribosyltransferase         | CZ | -0.14654 | 0.161629 | b  |
| Nicotinamide phosphoribosyltransferase         | DZ | -0.73186 | 0.183458 | b  |
| Nicotinamide phosphoribosyltransferase         | EZ | -0.8403  | 0.203534 | b  |

|                                                                        |    |          |          |    |
|------------------------------------------------------------------------|----|----------|----------|----|
| Nicotinamide-nucleotide adenylyltransferase                            | AZ | 0.878729 | 0.080974 | a  |
| Nicotinamide-nucleotide adenylyltransferase                            | BZ | 0.930567 | 0.031801 | a  |
| Nicotinamide-nucleotide adenylyltransferase                            | CZ | -0.50622 | 0.197665 | b  |
| Nicotinamide-nucleotide adenylyltransferase                            | DZ | -0.63167 | 0.123576 | b  |
| Nicotinamide-nucleotide adenylyltransferase                            | EZ | -0.6714  | 0.20219  | b  |
| Nicotinate-nucleotide diphosphorylase (carboxylating)                  | AZ | 0.860117 | 0.108704 | a  |
| Nicotinate-nucleotide diphosphorylase (carboxylating)                  | BZ | 0.960435 | 0.035561 | a  |
| Nicotinate-nucleotide diphosphorylase (carboxylating)                  | CZ | -0.41979 | 0.180996 | b  |
| Nicotinate-nucleotide diphosphorylase (carboxylating)                  | DZ | -0.82634 | 0.112576 | b  |
| Nicotinate-nucleotide diphosphorylase (carboxylating)                  | EZ | -0.57442 | 0.197289 | b  |
| Nicotinate-nucleotide--dimethylbenzimidazole phosphoribosyltransferase | AZ | -0.89137 | 0.161964 | b  |
| Nicotinate-nucleotide--dimethylbenzimidazole phosphoribosyltransferase | BZ | -0.83904 | 0.113938 | b  |
| Nicotinate-nucleotide--dimethylbenzimidazole phosphoribosyltransferase | CZ | 0.501417 | 0.121032 | a  |
| Nicotinate-nucleotide--dimethylbenzimidazole phosphoribosyltransferase | DZ | 0.690333 | 0.061715 | a  |
| Nicotinate-nucleotide--dimethylbenzimidazole phosphoribosyltransferase | EZ | 0.538661 | 0.237687 | a  |
| Nitrilase                                                              | AZ | -0.88132 | 0.160783 | b  |
| Nitrilase                                                              | BZ | -0.91248 | 0.098793 | b  |
| Nitrilase                                                              | CZ | 0.567339 | 0.11131  | a  |
| Nitrilase                                                              | DZ | 0.761441 | 0.065842 | a  |
| Nitrilase                                                              | EZ | 0.465021 | 0.226497 | a  |
| Non-reducing end alpha-L-arabinofuranosidase                           | AZ | -0.91414 | 0.157092 | b  |
| Non-reducing end alpha-L-arabinofuranosidase                           | BZ | -0.90779 | 0.092949 | b  |
| Non-reducing end alpha-L-arabinofuranosidase                           | CZ | 0.590031 | 0.10059  | a  |
| Non-reducing end alpha-L-arabinofuranosidase                           | DZ | 0.782694 | 0.083307 | a  |
| Non-reducing end alpha-L-arabinofuranosidase                           | EZ | 0.449204 | 0.220252 | a  |
| Nucleoside-diphosphate kinase                                          | AZ | 0.868975 | 0.073334 | a  |
| Nucleoside-diphosphate kinase                                          | BZ | 0.951917 | 0.020095 | a  |
| Nucleoside-diphosphate kinase                                          | CZ | -0.25343 | 0.156533 | b  |
| Nucleoside-diphosphate kinase                                          | DZ | -0.80808 | 0.142968 | b  |
| Nucleoside-diphosphate kinase                                          | EZ | -0.75939 | 0.20376  | b  |
| Nucleoside-triphosphate diphosphatase                                  | AZ | 0.803114 | 0.08275  | a  |
| Nucleoside-triphosphate diphosphatase                                  | BZ | 0.87983  | 0.026474 | a  |
| Nucleoside-triphosphate diphosphatase                                  | CZ | 0.042854 | 0.094703 | ab |
| Nucleoside-triphosphate diphosphatase                                  | DZ | -0.91859 | 0.171519 | c  |
| Nucleoside-triphosphate diphosphatase                                  | EZ | -0.80721 | 0.219655 | bc |
| Nucleoside-triphosphate phosphatase                                    | AZ | -0.93034 | 0.163708 | b  |
| Nucleoside-triphosphate phosphatase                                    | BZ | -0.84634 | 0.100899 | b  |
| Nucleoside-triphosphate phosphatase                                    | CZ | 0.49594  | 0.092128 | a  |
| Nucleoside-triphosphate phosphatase                                    | DZ | 0.816902 | 0.079034 | a  |
| Nucleoside-triphosphate phosphatase                                    | EZ | 0.463833 | 0.229724 | a  |
| o-pyrocatechuate decarboxylase                                         | AZ | -0.90332 | 0.084559 | b  |
| o-pyrocatechuate decarboxylase                                         | BZ | -1.14563 | 0.063606 | b  |
| o-pyrocatechuate decarboxylase                                         | CZ | 0.740765 | 0.092797 | a  |
| o-pyrocatechuate decarboxylase                                         | DZ | 0.615915 | 0.0853   | a  |



|                                      |    |          |          |    |
|--------------------------------------|----|----------|----------|----|
| o-pyrocatechuate decarboxylase       | EZ | 0.692261 | 0.190077 | a  |
| Oleate hydratase                     | AZ | -0.81857 | 0.083135 | b  |
| Oleate hydratase                     | BZ | -1.204   | 0.060222 | b  |
| Oleate hydratase                     | CZ | 0.768072 | 0.113489 | a  |
| Oleate hydratase                     | DZ | 0.65262  | 0.106526 | a  |
| Oleate hydratase                     | EZ | 0.601875 | 0.174201 | a  |
| Oligo-1,6-glucosidase                | AZ | -0.99026 | 0.150666 | b  |
| Oligo-1,6-glucosidase                | BZ | -0.25634 | 0.208797 | ab |
| Oligo-1,6-glucosidase                | CZ | 0.302174 | 0.18971  | a  |
| Oligo-1,6-glucosidase                | DZ | 0.800486 | 0.11857  | a  |
| Oligo-1,6-glucosidase                | EZ | 0.143942 | 0.18357  | ab |
| Oligopeptidase B                     | AZ | 0.835083 | 0.040204 | a  |
| Oligopeptidase B                     | BZ | 0.883621 | 0.010458 | a  |
| Oligopeptidase B                     | CZ | -0.14654 | 0.161629 | b  |
| Oligopeptidase B                     | DZ | -0.73186 | 0.183458 | b  |
| Oligopeptidase B                     | EZ | -0.8403  | 0.203534 | b  |
| Omega-amidase                        | AZ | -0.91815 | 0.130856 | b  |
| Omega-amidase                        | BZ | -0.88248 | 0.183847 | b  |
| Omega-amidase                        | CZ | 0.633049 | 0.096675 | a  |
| Omega-amidase                        | DZ | 0.527191 | 0.077845 | a  |
| Omega-amidase                        | EZ | 0.640396 | 0.195302 | a  |
| Ornithine aminotransferase           | AZ | 0.566457 | 0.074956 | a  |
| Ornithine aminotransferase           | BZ | 0.798427 | 0.044119 | a  |
| Ornithine aminotransferase           | CZ | 0.350495 | 0.148538 | a  |
| Ornithine aminotransferase           | DZ | -1.01451 | 0.214746 | b  |
| Ornithine aminotransferase           | EZ | -0.70087 | 0.184859 | b  |
| Ornithine carbamoyltransferase       | AZ | 0.866802 | 0.103111 | a  |
| Ornithine carbamoyltransferase       | BZ | 0.962972 | 0.033353 | a  |
| Ornithine carbamoyltransferase       | CZ | -0.38555 | 0.173323 | b  |
| Ornithine carbamoyltransferase       | DZ | -0.76463 | 0.109365 | b  |
| Ornithine carbamoyltransferase       | EZ | -0.67959 | 0.206309 | b  |
| Ornithine cyclodeaminase             | AZ | -0.83465 | 0.16958  | b  |
| Ornithine cyclodeaminase             | BZ | -0.92386 | 0.104238 | b  |
| Ornithine cyclodeaminase             | CZ | 0.603803 | 0.147263 | a  |
| Ornithine cyclodeaminase             | DZ | 0.763103 | 0.041511 | a  |
| Ornithine cyclodeaminase             | EZ | 0.3916   | 0.210825 | a  |
| Orotate phosphoribosyltransferase    | AZ | 0.869003 | 0.101853 | a  |
| Orotate phosphoribosyltransferase    | BZ | 0.961099 | 0.033099 | a  |
| Orotate phosphoribosyltransferase    | CZ | -0.37196 | 0.17163  | b  |
| Orotate phosphoribosyltransferase    | DZ | -0.78328 | 0.111643 | b  |
| Orotate phosphoribosyltransferase    | EZ | -0.67486 | 0.205669 | b  |
| Orotidine-5'-phosphate decarboxylase | AZ | 0.717664 | 0.097725 | ab |
| Orotidine-5'-phosphate decarboxylase | BZ | 0.891248 | 0.023669 | a  |
| Orotidine-5'-phosphate decarboxylase | CZ | -0.26464 | 0.168063 | bc |

|                                                    |    |          |          |    |
|----------------------------------------------------|----|----------|----------|----|
| Orotidine-5'-phosphate decarboxylase               | DZ | -0.69127 | 0.212079 | c  |
| Orotidine-5'-phosphate decarboxylase               | EZ | -0.65299 | 0.206116 | c  |
| Oxoglutarate dehydrogenase (succinyl-transferring) | AZ | 0.861154 | 0.089157 | a  |
| Oxoglutarate dehydrogenase (succinyl-transferring) | BZ | 0.946983 | 0.027374 | a  |
| Oxoglutarate dehydrogenase (succinyl-transferring) | CZ | -0.29093 | 0.163403 | b  |
| Oxoglutarate dehydrogenase (succinyl-transferring) | DZ | -0.78173 | 0.133704 | b  |
| Oxoglutarate dehydrogenase (succinyl-transferring) | EZ | -0.73548 | 0.207298 | b  |
| Palmitoyl-CoA hydrolase                            | AZ | 0.835529 | 0.043348 | a  |
| Palmitoyl-CoA hydrolase                            | BZ | 0.785056 | 0.044792 | a  |
| Palmitoyl-CoA hydrolase                            | CZ | -0.57772 | 0.207349 | b  |
| Palmitoyl-CoA hydrolase                            | DZ | -0.81425 | 0.232971 | b  |
| Palmitoyl-CoA hydrolase                            | EZ | -0.22861 | 0.14378  | ab |
| Palmitoyl-protein hydrolase                        | AZ | 0.878595 | 0.103414 | a  |
| Palmitoyl-protein hydrolase                        | BZ | 0.940052 | 0.040484 | a  |
| Palmitoyl-protein hydrolase                        | CZ | -0.37419 | 0.173478 | b  |
| Palmitoyl-protein hydrolase                        | DZ | -0.75436 | 0.109297 | b  |
| Palmitoyl-protein hydrolase                        | EZ | -0.6901  | 0.208757 | b  |
| Pantetheine-phosphate adenylyltransferase          | AZ | -0.8949  | 0.175888 | b  |
| Pantetheine-phosphate adenylyltransferase          | BZ | -0.92275 | 0.081658 | b  |
| Pantetheine-phosphate adenylyltransferase          | CZ | 0.563471 | 0.122989 | a  |
| Pantetheine-phosphate adenylyltransferase          | DZ | 0.788573 | 0.147729 | a  |
| Pantetheine-phosphate adenylyltransferase          | EZ | 0.465609 | 0.158184 | a  |
| Pantoate--beta-alanine ligase (AMP-forming)        | AZ | 0.866802 | 0.103111 | a  |
| Pantoate--beta-alanine ligase (AMP-forming)        | BZ | 0.962972 | 0.033353 | a  |
| Pantoate--beta-alanine ligase (AMP-forming)        | CZ | -0.38555 | 0.173323 | b  |
| Pantoate--beta-alanine ligase (AMP-forming)        | DZ | -0.76463 | 0.109365 | b  |
| Pantoate--beta-alanine ligase (AMP-forming)        | EZ | -0.67959 | 0.206309 | b  |
| Pantothenate kinase                                | AZ | 0.876679 | 0.090698 | a  |
| Pantothenate kinase                                | BZ | 0.984317 | 0.028123 | a  |
| Pantothenate kinase                                | CZ | -0.45752 | 0.163466 | b  |
| Pantothenate kinase                                | DZ | -0.744   | 0.132625 | b  |
| Pantothenate kinase                                | EZ | -0.65947 | 0.199779 | b  |
| Pectate lyase                                      | AZ | -0.85325 | 0.121212 | b  |
| Pectate lyase                                      | BZ | -1.12128 | 0.044211 | b  |
| Pectate lyase                                      | CZ | 0.72192  | 0.121058 | a  |
| Pectate lyase                                      | DZ | 0.660688 | 0.100523 | a  |
| Pectate lyase                                      | EZ | 0.591927 | 0.184187 | a  |
| Pectin lyase                                       | AZ | -0.85084 | 0.089212 | b  |
| Pectin lyase                                       | BZ | -1.17283 | 0.053363 | b  |
| Pectin lyase                                       | CZ | 0.744517 | 0.114432 | a  |
| Pectin lyase                                       | DZ | 0.664626 | 0.100056 | a  |
| Pectin lyase                                       | EZ | 0.614519 | 0.18009  | a  |
| Pectinesterase                                     | AZ | -1.02906 | 0.143462 | b  |
| Pectinesterase                                     | BZ | -0.86816 | 0.071201 | b  |

|                                                            |    |          |          |    |
|------------------------------------------------------------|----|----------|----------|----|
| Pectinesterase                                             | CZ | 0.555381 | 0.107399 | a  |
| Pectinesterase                                             | DZ | 0.927744 | 0.051064 | a  |
| Pectinesterase                                             | EZ | 0.414089 | 0.206259 | a  |
| Pepsin A                                                   | AZ | -0.94725 | 0.190344 | b  |
| Pepsin A                                                   | BZ | -0.87214 | 0.066234 | b  |
| Pepsin A                                                   | CZ | 0.460844 | 0.138494 | a  |
| Pepsin A                                                   | DZ | 0.913952 | 0.09582  | a  |
| Pepsin A                                                   | EZ | 0.444593 | 0.160802 | a  |
| Peptide alpha-N-acetyltransferase                          | AZ | -0.82843 | 0.019853 | b  |
| Peptide alpha-N-acetyltransferase                          | BZ | -0.74934 | 0.117252 | b  |
| Peptide alpha-N-acetyltransferase                          | CZ | 0.682107 | 0.240302 | a  |
| Peptide alpha-N-acetyltransferase                          | DZ | 0.636891 | 0.202254 | a  |
| Peptide alpha-N-acetyltransferase                          | EZ | 0.258777 | 0.133874 | ab |
| Peptide-N(4)-(N-acetyl-beta-glucosaminy)asparagine amidase | AZ | -0.81841 | 0.165027 | b  |
| Peptide-N(4)-(N-acetyl-beta-glucosaminy)asparagine amidase | BZ | -0.94357 | 0.117161 | b  |
| Peptide-N(4)-(N-acetyl-beta-glucosaminy)asparagine amidase | CZ | 0.554784 | 0.075302 | a  |
| Peptide-N(4)-(N-acetyl-beta-glucosaminy)asparagine amidase | DZ | 0.743188 | 0.101957 | a  |
| Peptide-N(4)-(N-acetyl-beta-glucosaminy)asparagine amidase | EZ | 0.464003 | 0.226269 | a  |
| Peptidylprolyl isomerase                                   | AZ | 0.884439 | 0.091169 | a  |
| Peptidylprolyl isomerase                                   | BZ | 0.970379 | 0.029634 | a  |
| Peptidylprolyl isomerase                                   | CZ | -0.36485 | 0.161255 | b  |
| Peptidylprolyl isomerase                                   | DZ | -0.79435 | 0.119368 | b  |
| Peptidylprolyl isomerase                                   | EZ | -0.69562 | 0.204853 | b  |
| Peroxidase                                                 | AZ | -0.91558 | 0.165896 | b  |
| Peroxidase                                                 | BZ | -0.83131 | 0.104741 | b  |
| Peroxidase                                                 | CZ | 0.533872 | 0.104321 | a  |
| Peroxidase                                                 | DZ | 0.737251 | 0.071025 | a  |
| Peroxidase                                                 | EZ | 0.475765 | 0.237417 | a  |
| Persulfide dioxygenase                                     | AZ | -0.88123 | 0.086574 | b  |
| Persulfide dioxygenase                                     | BZ | -1.15649 | 0.059691 | b  |
| Persulfide dioxygenase                                     | CZ | 0.734481 | 0.103584 | a  |
| Persulfide dioxygenase                                     | DZ | 0.64058  | 0.09162  | a  |
| Persulfide dioxygenase                                     | EZ | 0.662659 | 0.1862   | a  |
| Phenol 2-monooxygenase                                     | AZ | -0.96618 | 0.163152 | b  |
| Phenol 2-monooxygenase                                     | BZ | -0.84009 | 0.094829 | b  |
| Phenol 2-monooxygenase                                     | CZ | 0.531597 | 0.106045 | a  |
| Phenol 2-monooxygenase                                     | DZ | 0.82865  | 0.044663 | a  |
| Phenol 2-monooxygenase                                     | EZ | 0.44602  | 0.225337 | a  |
| Phenylalanine 4-monooxygenase                              | AZ | 0.835083 | 0.040204 | a  |
| Phenylalanine 4-monooxygenase                              | BZ | 0.883621 | 0.010458 | a  |
| Phenylalanine 4-monooxygenase                              | CZ | -0.14654 | 0.161629 | b  |
| Phenylalanine 4-monooxygenase                              | DZ | -0.73186 | 0.183458 | b  |
| Phenylalanine 4-monooxygenase                              | EZ | -0.8403  | 0.203534 | b  |
| Phenylalanine--tRNA ligase                                 | AZ | 0.866801 | 0.103111 | a  |

|                                                       |    |          |          |   |
|-------------------------------------------------------|----|----------|----------|---|
| Phenylalanine--tRNA ligase                            | BZ | 0.962972 | 0.033353 | a |
| Phenylalanine--tRNA ligase                            | CZ | -0.38555 | 0.173323 | b |
| Phenylalanine--tRNA ligase                            | DZ | -0.76463 | 0.109365 | b |
| Phenylalanine--tRNA ligase                            | EZ | -0.67959 | 0.206309 | b |
| Phosphate-transporting ATPase                         | AZ | -0.79162 | 0.103435 | b |
| Phosphate-transporting ATPase                         | BZ | -1.15577 | 0.057948 | b |
| Phosphate-transporting ATPase                         | CZ | 0.789922 | 0.133689 | a |
| Phosphate-transporting ATPase                         | DZ | 0.702334 | 0.118265 | a |
| Phosphate-transporting ATPase                         | EZ | 0.455133 | 0.172454 | a |
| Phosphatidate cytidyltransferase                      | AZ | 0.866802 | 0.103111 | a |
| Phosphatidate cytidyltransferase                      | BZ | 0.962972 | 0.033353 | a |
| Phosphatidate cytidyltransferase                      | CZ | -0.38555 | 0.173323 | b |
| Phosphatidate cytidyltransferase                      | DZ | -0.76463 | 0.109365 | b |
| Phosphatidate cytidyltransferase                      | EZ | -0.67959 | 0.206309 | b |
| Phosphatidate phosphatase                             | AZ | 0.897831 | 0.078575 | a |
| Phosphatidate phosphatase                             | BZ | 0.968147 | 0.025799 | a |
| Phosphatidate phosphatase                             | CZ | -0.54933 | 0.186643 | b |
| Phosphatidate phosphatase                             | DZ | -0.77783 | 0.124558 | b |
| Phosphatidate phosphatase                             | EZ | -0.53881 | 0.189168 | b |
| Phosphatidyl-N-methylethanolamine N-methyltransferase | AZ | -1.06871 | 0.232637 | b |
| Phosphatidyl-N-methylethanolamine N-methyltransferase | BZ | -0.73775 | 0.066113 | b |
| Phosphatidyl-N-methylethanolamine N-methyltransferase | CZ | 0.389591 | 0.084582 | a |
| Phosphatidyl-N-methylethanolamine N-methyltransferase | DZ | 0.984553 | 0.081332 | a |
| Phosphatidyl-N-methylethanolamine N-methyltransferase | EZ | 0.432316 | 0.134232 | a |
| Phosphatidylethanolamine N-methyltransferase          | AZ | 0.866802 | 0.103111 | a |
| Phosphatidylethanolamine N-methyltransferase          | BZ | 0.962972 | 0.033353 | a |
| Phosphatidylethanolamine N-methyltransferase          | CZ | -0.38555 | 0.173323 | b |
| Phosphatidylethanolamine N-methyltransferase          | DZ | -0.76463 | 0.109365 | b |
| Phosphatidylethanolamine N-methyltransferase          | EZ | -0.67959 | 0.206309 | b |
| Phosphatidylglycerophosphatase                        | AZ | -0.87445 | 0.120752 | b |
| Phosphatidylglycerophosphatase                        | BZ | -0.93992 | 0.172271 | b |
| Phosphatidylglycerophosphatase                        | CZ | 0.651346 | 0.124801 | a |
| Phosphatidylglycerophosphatase                        | DZ | 0.61008  | 0.097015 | a |
| Phosphatidylglycerophosphatase                        | EZ | 0.552945 | 0.182316 | a |
| Phosphatidylinositol 3-kinase                         | AZ | 0.887953 | 0.087037 | a |
| Phosphatidylinositol 3-kinase                         | BZ | 0.969985 | 0.027559 | a |
| Phosphatidylinositol 3-kinase                         | CZ | -0.44839 | 0.175852 | b |
| Phosphatidylinositol 3-kinase                         | DZ | -0.72981 | 0.114308 | b |
| Phosphatidylinositol 3-kinase                         | EZ | -0.67973 | 0.203525 | b |
| Phosphatidylinositol N-acetylglucosaminyltransferase  | AZ | 0.889451 | 0.081837 | a |
| Phosphatidylinositol N-acetylglucosaminyltransferase  | BZ | 0.978848 | 0.025976 | a |
| Phosphatidylinositol N-acetylglucosaminyltransferase  | CZ | -0.42563 | 0.173234 | b |
| Phosphatidylinositol N-acetylglucosaminyltransferase  | DZ | -0.7732  | 0.118205 | b |
| Phosphatidylinositol N-acetylglucosaminyltransferase  | EZ | -0.66947 | 0.199556 | b |

|                                                                 |    |          |          |     |
|-----------------------------------------------------------------|----|----------|----------|-----|
| Phosphatidylserine decarboxylase                                | AZ | -0.79005 | 0.069909 | b   |
| Phosphatidylserine decarboxylase                                | BZ | -0.88011 | 0.035676 | b   |
| Phosphatidylserine decarboxylase                                | CZ | 0.263634 | 0.223118 | a   |
| Phosphatidylserine decarboxylase                                | DZ | 0.861713 | 0.163524 | a   |
| Phosphatidylserine decarboxylase                                | EZ | 0.544818 | 0.178704 | a   |
| Phosphoacetylglucosamine mutase                                 | AZ | 0.866694 | 0.102883 | a   |
| Phosphoacetylglucosamine mutase                                 | BZ | 0.962712 | 0.03327  | a   |
| Phosphoacetylglucosamine mutase                                 | CZ | -0.38294 | 0.172965 | b   |
| Phosphoacetylglucosamine mutase                                 | DZ | -0.76987 | 0.110638 | b   |
| Phosphoacetylglucosamine mutase                                 | EZ | -0.6766  | 0.205902 | b   |
| Phosphodiesterase I                                             | AZ | -0.70639 | 0.03206  | bc  |
| Phosphodiesterase I                                             | BZ | -0.79137 | 0.035701 | c   |
| Phosphodiesterase I                                             | CZ | 0.219899 | 0.238333 | abc |
| Phosphodiesterase I                                             | DZ | 0.895632 | 0.232956 | a   |
| Phosphodiesterase I                                             | EZ | 0.382228 | 0.143295 | ab  |
| Phosphoenolpyruvate carboxykinase (ATP)                         | AZ | 0.866659 | 0.102881 | a   |
| Phosphoenolpyruvate carboxykinase (ATP)                         | BZ | 0.962763 | 0.033284 | a   |
| Phosphoenolpyruvate carboxykinase (ATP)                         | CZ | -0.38295 | 0.172962 | b   |
| Phosphoenolpyruvate carboxykinase (ATP)                         | DZ | -0.76987 | 0.110636 | b   |
| Phosphoenolpyruvate carboxykinase (ATP)                         | EZ | -0.6766  | 0.205898 | b   |
| Phosphoenolpyruvate mutase                                      | AZ | -0.82559 | 0.203332 | b   |
| Phosphoenolpyruvate mutase                                      | BZ | -0.7258  | 0.140931 | b   |
| Phosphoenolpyruvate mutase                                      | CZ | 0.483151 | 0.220533 | a   |
| Phosphoenolpyruvate mutase                                      | DZ | 0.485257 | 0.075736 | a   |
| Phosphoenolpyruvate mutase                                      | EZ | 0.582975 | 0.153514 | a   |
| Phosphoethanolamine N-methyltransferase                         | AZ | -0.61232 | 0.084784 | b   |
| Phosphoethanolamine N-methyltransferase                         | BZ | -1.32059 | 0.139203 | b   |
| Phosphoethanolamine N-methyltransferase                         | CZ | 0.710696 | 0.107787 | a   |
| Phosphoethanolamine N-methyltransferase                         | DZ | 0.604545 | 0.1063   | a   |
| Phosphoethanolamine N-methyltransferase                         | EZ | 0.617669 | 0.148215 | a   |
| Phosphoglucomutase (alpha-D-glucose-1,6-bisphosphate-dependent) | AZ | 0.82414  | 0.10687  | a   |
| Phosphoglucomutase (alpha-D-glucose-1,6-bisphosphate-dependent) | BZ | 0.923816 | 0.034569 | a   |
| Phosphoglucomutase (alpha-D-glucose-1,6-bisphosphate-dependent) | CZ | -0.146   | 0.169765 | b   |
| Phosphoglucomutase (alpha-D-glucose-1,6-bisphosphate-dependent) | DZ | -0.84631 | 0.110887 | b   |
| Phosphoglucomutase (alpha-D-glucose-1,6-bisphosphate-dependent) | EZ | -0.75565 | 0.210255 | b   |
| Phosphoglycerate dehydrogenase                                  | AZ | -0.80194 | 0.145618 | b   |
| Phosphoglycerate dehydrogenase                                  | BZ | -0.9934  | 0.054112 | b   |
| Phosphoglycerate dehydrogenase                                  | CZ | 0.542293 | 0.150345 | a   |
| Phosphoglycerate dehydrogenase                                  | DZ | 0.587052 | 0.108454 | a   |
| Phosphoglycerate dehydrogenase                                  | EZ | 0.665993 | 0.214223 | a   |
| Phosphoglycerate kinase                                         | AZ | 0.866836 | 0.103113 | a   |
| Phosphoglycerate kinase                                         | BZ | 0.96292  | 0.033339 | a   |
| Phosphoglycerate kinase                                         | CZ | -0.38554 | 0.173326 | b   |
| Phosphoglycerate kinase                                         | DZ | -0.76463 | 0.109367 | b   |

|                                   |    |          |          |    |
|-----------------------------------|----|----------|----------|----|
| Phosphoglycerate kinase           | EZ | -0.67959 | 0.206313 | b  |
| Phosphoglycolate phosphatase      | AZ | 0.84509  | 0.103869 | a  |
| Phosphoglycolate phosphatase      | BZ | 0.945677 | 0.029362 | a  |
| Phosphoglycolate phosphatase      | CZ | -0.31896 | 0.150613 | b  |
| Phosphoglycolate phosphatase      | DZ | -0.89365 | 0.159259 | b  |
| Phosphoglycolate phosphatase      | EZ | -0.57816 | 0.195311 | b  |
| Phosphoinositide 5-phosphatase    | AZ | -0.83199 | 0.092479 | b  |
| Phosphoinositide 5-phosphatase    | BZ | -0.9807  | 0.044291 | b  |
| Phosphoinositide 5-phosphatase    | CZ | 0.48724  | 0.216425 | a  |
| Phosphoinositide 5-phosphatase    | DZ | 0.733177 | 0.085615 | a  |
| Phosphoinositide 5-phosphatase    | EZ | 0.592269 | 0.190606 | a  |
| Phosphoinositide phospholipase C  | AZ | -0.80922 | 0.129003 | b  |
| Phosphoinositide phospholipase C  | BZ | -0.973   | 0.043158 | b  |
| Phosphoinositide phospholipase C  | CZ | 0.479028 | 0.149679 | a  |
| Phosphoinositide phospholipase C  | DZ | 0.731959 | 0.160367 | a  |
| Phosphoinositide phospholipase C  | EZ | 0.57123  | 0.196772 | a  |
| Phospholipase A(2)                | AZ | -0.91658 | 0.138274 | b  |
| Phospholipase A(2)                | BZ | -0.87443 | 0.17501  | b  |
| Phospholipase A(2)                | CZ | 0.581778 | 0.121809 | a  |
| Phospholipase A(2)                | DZ | 0.747161 | 0.073463 | a  |
| Phospholipase A(2)                | EZ | 0.462069 | 0.185119 | a  |
| Phospholipase C                   | AZ | -0.85632 | 0.086937 | b  |
| Phospholipase C                   | BZ | -1.17695 | 0.055952 | b  |
| Phospholipase C                   | CZ | 0.7418   | 0.109988 | a  |
| Phospholipase C                   | DZ | 0.655793 | 0.09683  | a  |
| Phospholipase C                   | EZ | 0.635671 | 0.180813 | a  |
| Phospholipase D                   | AZ | -0.69548 | 0.062349 | c  |
| Phospholipase D                   | BZ | -0.79598 | 0.035636 | c  |
| Phospholipase D                   | CZ | -0.07529 | 0.038277 | bc |
| Phospholipase D                   | DZ | 1.143378 | 0.280262 | a  |
| Phospholipase D                   | EZ | 0.423376 | 0.156063 | ab |
| Phospholipid-translocating ATPase | AZ | 0.881992 | 0.090283 | a  |
| Phospholipid-translocating ATPase | BZ | 0.9729   | 0.026874 | a  |
| Phospholipid-translocating ATPase | CZ | -0.38137 | 0.16568  | b  |
| Phospholipid-translocating ATPase | DZ | -0.74116 | 0.114001 | b  |
| Phospholipid-translocating ATPase | EZ | -0.73237 | 0.207129 | b  |
| Phosphomannomutase                | AZ | 0.8371   | 0.085447 | a  |
| Phosphomannomutase                | BZ | 0.928181 | 0.024289 | a  |
| Phosphomannomutase                | CZ | -0.27402 | 0.143883 | b  |
| Phosphomannomutase                | DZ | -0.94822 | 0.185613 | b  |
| Phosphomannomutase                | EZ | -0.54304 | 0.188113 | b  |
| Phosphomethylpyrimidine kinase    | AZ | 0.812489 | 0.079898 | a  |
| Phosphomethylpyrimidine kinase    | BZ | 0.923037 | 0.021656 | a  |
| Phosphomethylpyrimidine kinase    | CZ | -0.17702 | 0.132805 | b  |

|                                                         |    |          |          |   |
|---------------------------------------------------------|----|----------|----------|---|
| Phosphomethylpyrimidine kinase                          | DZ | -0.62302 | 0.160477 | b |
| Phosphomethylpyrimidine kinase                          | EZ | -0.93549 | 0.222304 | b |
| Phosphomevalonate kinase                                | AZ | 0.866802 | 0.103111 | a |
| Phosphomevalonate kinase                                | BZ | 0.962972 | 0.033353 | a |
| Phosphomevalonate kinase                                | CZ | -0.38555 | 0.173323 | b |
| Phosphomevalonate kinase                                | DZ | -0.76463 | 0.109365 | b |
| Phosphomevalonate kinase                                | EZ | -0.67959 | 0.206309 | b |
| Phosphopantothenate--cysteine ligase                    | AZ | 0.867003 | 0.102901 | a |
| Phosphopantothenate--cysteine ligase                    | BZ | 0.962252 | 0.033146 | a |
| Phosphopantothenate--cysteine ligase                    | CZ | -0.38285 | 0.172995 | b |
| Phosphopantothenate--cysteine ligase                    | DZ | -0.76985 | 0.110658 | b |
| Phosphopantothenate--cysteine ligase                    | EZ | -0.67656 | 0.205938 | b |
| Phosphopantothenoylcysteine decarboxylase               | AZ | 0.817174 | 0.11207  | a |
| Phosphopantothenoylcysteine decarboxylase               | BZ | 0.918005 | 0.036871 | a |
| Phosphopantothenoylcysteine decarboxylase               | CZ | -0.14709 | 0.175339 | b |
| Phosphopantothenoylcysteine decarboxylase               | DZ | -0.93479 | 0.116632 | b |
| Phosphopantothenoylcysteine decarboxylase               | EZ | -0.6533  | 0.200239 | b |
| Phosphopyruvate hydratase                               | AZ | 0.859015 | 0.111385 | a |
| Phosphopyruvate hydratase                               | BZ | 0.957644 | 0.03672  | a |
| Phosphopyruvate hydratase                               | CZ | -0.43721 | 0.187281 | b |
| Phosphopyruvate hydratase                               | DZ | -0.84344 | 0.112283 | b |
| Phosphopyruvate hydratase                               | EZ | -0.53601 | 0.190583 | b |
| Phosphoribosylamine--glycine ligase                     | AZ | -0.75153 | 0.195465 | b |
| Phosphoribosylamine--glycine ligase                     | BZ | -0.8319  | 0.129066 | b |
| Phosphoribosylamine--glycine ligase                     | CZ | 0.619984 | 0.108694 | a |
| Phosphoribosylamine--glycine ligase                     | DZ | 0.434852 | 0.113952 | a |
| Phosphoribosylamine--glycine ligase                     | EZ | 0.52859  | 0.234199 | a |
| Phosphoribosylaminoimidazole carboxylase                | AZ | 0.867146 | 0.103132 | a |
| Phosphoribosylaminoimidazole carboxylase                | BZ | 0.96246  | 0.033215 | a |
| Phosphoribosylaminoimidazole carboxylase                | CZ | -0.38545 | 0.173357 | b |
| Phosphoribosylaminoimidazole carboxylase                | DZ | -0.7646  | 0.109387 | b |
| Phosphoribosylaminoimidazole carboxylase                | EZ | -0.67955 | 0.206349 | b |
| Phosphoribosylaminoimidazolesuccinocarboxamide synthase | AZ | 0.866802 | 0.103111 | a |
| Phosphoribosylaminoimidazolesuccinocarboxamide synthase | BZ | 0.962972 | 0.033353 | a |
| Phosphoribosylaminoimidazolesuccinocarboxamide synthase | CZ | -0.38555 | 0.173323 | b |
| Phosphoribosylaminoimidazolesuccinocarboxamide synthase | DZ | -0.76463 | 0.109365 | b |
| Phosphoribosylaminoimidazolesuccinocarboxamide synthase | EZ | -0.67959 | 0.206309 | b |
| Phosphoribosylformylglycinamide synthase                | AZ | 0.866802 | 0.103111 | a |
| Phosphoribosylformylglycinamide synthase                | BZ | 0.962972 | 0.033353 | a |
| Phosphoribosylformylglycinamide synthase                | CZ | -0.38555 | 0.173323 | b |
| Phosphoribosylformylglycinamide synthase                | DZ | -0.76463 | 0.109365 | b |
| Phosphoribosylformylglycinamide synthase                | EZ | -0.67959 | 0.206309 | b |
| Phosphoribosylglycinamide formyltransferase             | AZ | 0.868645 | 0.101496 | a |
| Phosphoribosylglycinamide formyltransferase             | BZ | 0.960563 | 0.032988 | a |

|                                             |    |          |          |    |
|---------------------------------------------|----|----------|----------|----|
| Phosphoribosylglycinamide formyltransferase | CZ | -0.3711  | 0.171907 | b  |
| Phosphoribosylglycinamide formyltransferase | DZ | -0.78655 | 0.112839 | b  |
| Phosphoribosylglycinamide formyltransferase | EZ | -0.67155 | 0.205174 | b  |
| Phosphoserine phosphatase                   | AZ | 0.855235 | 0.072045 | a  |
| Phosphoserine phosphatase                   | BZ | 0.914577 | 0.024572 | a  |
| Phosphoserine phosphatase                   | CZ | -0.59987 | 0.242775 | b  |
| Phosphoserine phosphatase                   | DZ | -0.69761 | 0.072332 | b  |
| Phosphoserine phosphatase                   | EZ | -0.47234 | 0.195347 | b  |
| Phosphoserine transaminase                  | AZ | 0.866802 | 0.103111 | a  |
| Phosphoserine transaminase                  | BZ | 0.962972 | 0.033353 | a  |
| Phosphoserine transaminase                  | CZ | -0.38555 | 0.173323 | b  |
| Phosphoserine transaminase                  | DZ | -0.76463 | 0.109365 | b  |
| Phosphoserine transaminase                  | EZ | -0.67959 | 0.206309 | b  |
| Phytanoyl-CoA dioxygenase                   | AZ | -0.92849 | 0.112252 | b  |
| Phytanoyl-CoA dioxygenase                   | BZ | -0.97052 | 0.149811 | b  |
| Phytanoyl-CoA dioxygenase                   | CZ | 0.656261 | 0.101742 | a  |
| Phytanoyl-CoA dioxygenase                   | DZ | 0.628795 | 0.071513 | a  |
| Phytanoyl-CoA dioxygenase                   | EZ | 0.613951 | 0.197841 | a  |
| Phytapsin                                   | AZ | -1.10532 | 0.122377 | c  |
| Phytapsin                                   | BZ | -0.49483 | 0.108981 | bc |
| Phytapsin                                   | CZ | 0.503281 | 0.062782 | ab |
| Phytapsin                                   | DZ | 0.688895 | 0.169774 | a  |
| Phytapsin                                   | EZ | 0.407976 | 0.249674 | ab |
| Poly(A)-specific ribonuclease               | AZ | 0.843143 | 0.09614  | a  |
| Poly(A)-specific ribonuclease               | BZ | 0.933579 | 0.026702 | a  |
| Poly(A)-specific ribonuclease               | CZ | -0.64361 | 0.193105 | b  |
| Poly(A)-specific ribonuclease               | DZ | -0.7132  | 0.128611 | b  |
| Poly(A)-specific ribonuclease               | EZ | -0.41991 | 0.205256 | b  |
| Poly(ADP-ribose) glycohydrolase             | AZ | -0.91835 | 0.095926 | b  |
| Poly(ADP-ribose) glycohydrolase             | BZ | -1.08963 | 0.074358 | b  |
| Poly(ADP-ribose) glycohydrolase             | CZ | 0.747501 | 0.100282 | a  |
| Poly(ADP-ribose) glycohydrolase             | DZ | 0.619499 | 0.087865 | a  |
| Poly(ADP-ribose) glycohydrolase             | EZ | 0.640976 | 0.195679 | a  |
| Polyamine-transporting ATPase               | AZ | -0.58224 | 0.05391  | bc |
| Polyamine-transporting ATPase               | BZ | -0.99607 | 0.145874 | c  |
| Polyamine-transporting ATPase               | CZ | 0.626634 | 0.015947 | a  |
| Polyamine-transporting ATPase               | DZ | 0.062719 | 0.254967 | ab |
| Polyamine-transporting ATPase               | EZ | 0.888953 | 0.15701  | a  |
| Polygalacturonase                           | AZ | -0.95977 | 0.161458 | b  |
| Polygalacturonase                           | BZ | -0.81485 | 0.095112 | b  |
| Polygalacturonase                           | CZ | 0.50564  | 0.112035 | a  |
| Polygalacturonase                           | DZ | 0.816801 | 0.032209 | a  |
| Polygalacturonase                           | EZ | 0.452179 | 0.235953 | a  |
| Polynucleotide 5'-hydroxyl-kinase           | AZ | -0.91474 | 0.116984 | b  |



|                                               |    |          |          |     |
|-----------------------------------------------|----|----------|----------|-----|
| Polynucleotide 5'-hydroxyl-kinase             | BZ | -0.95351 | 0.1432   | b   |
| Polynucleotide 5'-hydroxyl-kinase             | CZ | 0.65631  | 0.125821 | a   |
| Polynucleotide 5'-hydroxyl-kinase             | DZ | 0.727624 | 0.084706 | a   |
| Polynucleotide 5'-hydroxyl-kinase             | EZ | 0.484312 | 0.189128 | a   |
| Polypeptide N-acetylgalactosaminyltransferase | AZ | -0.86922 | 0.121242 | b   |
| Polypeptide N-acetylgalactosaminyltransferase | BZ | -0.93495 | 0.17297  | b   |
| Polypeptide N-acetylgalactosaminyltransferase | CZ | 0.626198 | 0.129524 | a   |
| Polypeptide N-acetylgalactosaminyltransferase | DZ | 0.618622 | 0.09747  | a   |
| Polypeptide N-acetylgalactosaminyltransferase | EZ | 0.559346 | 0.182312 | a   |
| Polyprenyldihydroxybenzoate methyltransferase | AZ | -0.89082 | 0.163787 | b   |
| Polyprenyldihydroxybenzoate methyltransferase | BZ | -0.85791 | 0.105542 | b   |
| Polyprenyldihydroxybenzoate methyltransferase | CZ | 0.462163 | 0.094984 | a   |
| Polyprenyldihydroxybenzoate methyltransferase | DZ | 0.781342 | 0.092227 | a   |
| Polyprenyldihydroxybenzoate methyltransferase | EZ | 0.50522  | 0.232512 | a   |
| Polyribonucleotide nucleotidyltransferase     | AZ | 0.856247 | 0.081918 | a   |
| Polyribonucleotide nucleotidyltransferase     | BZ | 0.919564 | 0.029109 | a   |
| Polyribonucleotide nucleotidyltransferase     | CZ | -0.45978 | 0.20717  | b   |
| Polyribonucleotide nucleotidyltransferase     | DZ | -0.68297 | 0.12581  | b   |
| Polyribonucleotide nucleotidyltransferase     | EZ | -0.63307 | 0.202054 | b   |
| Prephenate dehydratase                        | AZ | -0.92901 | 0.113137 | b   |
| Prephenate dehydratase                        | BZ | -0.91189 | 0.189148 | b   |
| Prephenate dehydratase                        | CZ | 0.642822 | 0.098106 | a   |
| Prephenate dehydratase                        | DZ | 0.542419 | 0.082292 | a   |
| Prephenate dehydratase                        | EZ | 0.65566  | 0.182838 | a   |
| Prephenate dehydrogenase (NADP(+))            | AZ | 0.866836 | 0.103113 | a   |
| Prephenate dehydrogenase (NADP(+))            | BZ | 0.96292  | 0.033339 | a   |
| Prephenate dehydrogenase (NADP(+))            | CZ | -0.38554 | 0.173326 | b   |
| Prephenate dehydrogenase (NADP(+))            | DZ | -0.76463 | 0.109367 | b   |
| Prephenate dehydrogenase (NADP(+))            | EZ | -0.67959 | 0.206313 | b   |
| Procollagen galactosyltransferase             | AZ | -0.51189 | 0.051914 | bc  |
| Procollagen galactosyltransferase             | BZ | -0.96978 | 0.163971 | c   |
| Procollagen galactosyltransferase             | CZ | 0.552643 | 0.027522 | ab  |
| Procollagen galactosyltransferase             | DZ | 0.04002  | 0.269057 | abc |
| Procollagen galactosyltransferase             | EZ | 0.889012 | 0.14925  | a   |
| Procollagen-proline dioxygenase               | AZ | -0.91592 | 0.158521 | b   |
| Procollagen-proline dioxygenase               | BZ | -0.87684 | 0.103569 | b   |
| Procollagen-proline dioxygenase               | CZ | 0.582176 | 0.100116 | a   |
| Procollagen-proline dioxygenase               | DZ | 0.73485  | 0.068415 | a   |
| Procollagen-proline dioxygenase               | EZ | 0.475737 | 0.231926 | a   |
| Proline--tRNA ligase                          | AZ | 0.867814 | 0.100902 | a   |
| Proline--tRNA ligase                          | BZ | 0.969028 | 0.02764  | a   |
| Proline--tRNA ligase                          | CZ | -0.58046 | 0.213504 | b   |
| Proline--tRNA ligase                          | DZ | -0.74664 | 0.084163 | b   |
| Proline--tRNA ligase                          | EZ | -0.50974 | 0.18458  | b   |

|                                     |    |          |          |    |
|-------------------------------------|----|----------|----------|----|
| Prolyl aminopeptidase               | AZ | 0.800114 | 0.121641 | a  |
| Prolyl aminopeptidase               | BZ | 0.83743  | 0.054823 | a  |
| Prolyl aminopeptidase               | CZ | 0.177942 | 0.084244 | ab |
| Prolyl aminopeptidase               | DZ | -1.18079 | 0.104469 | c  |
| Prolyl aminopeptidase               | EZ | -0.6347  | 0.213718 | bc |
| Prolyl oligopeptidase               | AZ | 0.825767 | 0.059261 | a  |
| Prolyl oligopeptidase               | BZ | 0.892691 | 0.016936 | a  |
| Prolyl oligopeptidase               | CZ | -0.11604 | 0.154034 | b  |
| Prolyl oligopeptidase               | DZ | -0.74667 | 0.166498 | b  |
| Prolyl oligopeptidase               | EZ | -0.85575 | 0.213657 | b  |
| Propionate--CoA ligase              | AZ | -0.96261 | 0.15911  | b  |
| Propionate--CoA ligase              | BZ | -0.82215 | 0.099357 | b  |
| Propionate--CoA ligase              | CZ | 0.521479 | 0.100093 | a  |
| Propionate--CoA ligase              | DZ | 0.811744 | 0.064369 | a  |
| Propionate--CoA ligase              | EZ | 0.45153  | 0.231918 | a  |
| Propionyl-CoA carboxylase           | AZ | 0.848766 | 0.064828 | a  |
| Propionyl-CoA carboxylase           | BZ | 0.923182 | 0.018483 | a  |
| Propionyl-CoA carboxylase           | CZ | -0.45468 | 0.206712 | b  |
| Propionyl-CoA carboxylase           | DZ | -0.73519 | 0.16656  | b  |
| Propionyl-CoA carboxylase           | EZ | -0.58208 | 0.179018 | b  |
| Proprotein convertase 2             | AZ | -1.02877 | 0.15774  | b  |
| Proprotein convertase 2             | BZ | -0.22402 | 0.205929 | ab |
| Proprotein convertase 2             | CZ | 0.315487 | 0.184408 | a  |
| Proprotein convertase 2             | DZ | 0.814878 | 0.11712  | a  |
| Proprotein convertase 2             | EZ | 0.12243  | 0.175021 | ab |
| Prostaglandin-D synthase            | AZ | -0.72824 | 0.069858 | b  |
| Prostaglandin-D synthase            | BZ | -0.77055 | 0.071882 | b  |
| Prostaglandin-D synthase            | CZ | 0.617972 | 0.033574 | a  |
| Prostaglandin-D synthase            | DZ | -0.03072 | 0.280921 | ab |
| Prostaglandin-D synthase            | EZ | 0.911544 | 0.181706 | a  |
| Prostaglandin-E synthase            | AZ | -0.90959 | 0.121271 | b  |
| Prostaglandin-E synthase            | BZ | -0.91939 | 0.166399 | b  |
| Prostaglandin-E synthase            | CZ | 0.669095 | 0.113269 | a  |
| Prostaglandin-E synthase            | DZ | 0.584316 | 0.092462 | a  |
| Prostaglandin-E synthase            | EZ | 0.575561 | 0.191247 | a  |
| Prostaglandin-endoperoxide synthase | AZ | -0.878   | 0.04665  | b  |
| Prostaglandin-endoperoxide synthase | BZ | -0.50282 | 0.129332 | b  |
| Prostaglandin-endoperoxide synthase | CZ | -0.10696 | 0.264749 | ab |
| Prostaglandin-endoperoxide synthase | DZ | 0.689759 | 0.071996 | a  |
| Prostaglandin-endoperoxide synthase | EZ | 0.798026 | 0.196043 | a  |
| Proteasome endopeptidase complex    | AZ | 0.875182 | 0.092506 | a  |
| Proteasome endopeptidase complex    | BZ | 0.953193 | 0.031192 | a  |
| Proteasome endopeptidase complex    | CZ | -0.3694  | 0.17223  | b  |
| Proteasome endopeptidase complex    | DZ | -0.75    | 0.118754 | b  |

|                                                 |    |          |          |    |
|-------------------------------------------------|----|----------|----------|----|
| Proteasome endopeptidase complex                | EZ | -0.70897 | 0.207118 | b  |
| Protein C (activated)                           | AZ | -0.56855 | 0.054568 | bc |
| Protein C (activated)                           | BZ | -0.98743 | 0.147652 | c  |
| Protein C (activated)                           | CZ | 0.558435 | 0.029317 | a  |
| Protein C (activated)                           | DZ | 0.079358 | 0.257277 | ab |
| Protein C (activated)                           | EZ | 0.918183 | 0.158736 | a  |
| Protein disulfide-isomerase                     | AZ | 0.857955 | 0.103532 | a  |
| Protein disulfide-isomerase                     | BZ | 0.960947 | 0.031965 | a  |
| Protein disulfide-isomerase                     | CZ | -0.23576 | 0.137336 | b  |
| Protein disulfide-isomerase                     | DZ | -0.87397 | 0.132381 | b  |
| Protein disulfide-isomerase                     | EZ | -0.70918 | 0.206837 | b  |
| Protein-S-isoprenylcysteine O-methyltransferase | AZ | 0.644899 | 0.052546 | a  |
| Protein-S-isoprenylcysteine O-methyltransferase | BZ | 0.633771 | 0.041138 | a  |
| Protein-S-isoprenylcysteine O-methyltransferase | CZ | -0.64322 | 0.163028 | b  |
| Protein-S-isoprenylcysteine O-methyltransferase | DZ | 0.140722 | 0.28418  | ab |
| Protein-S-isoprenylcysteine O-methyltransferase | EZ | -0.77618 | 0.188502 | b  |
| Protein-serine/threonine phosphatase            | AZ | 0.88563  | 0.09317  | a  |
| Protein-serine/threonine phosphatase            | BZ | 0.975011 | 0.029088 | a  |
| Protein-serine/threonine phosphatase            | CZ | -0.40405 | 0.165638 | b  |
| Protein-serine/threonine phosphatase            | DZ | -0.76491 | 0.115027 | b  |
| Protein-serine/threonine phosphatase            | EZ | -0.69168 | 0.204251 | b  |
| Protein-tyrosine-phosphatase                    | AZ | 0.870969 | 0.101361 | a  |
| Protein-tyrosine-phosphatase                    | BZ | 0.960184 | 0.034275 | a  |
| Protein-tyrosine-phosphatase                    | CZ | -0.4367  | 0.16771  | b  |
| Protein-tyrosine-phosphatase                    | DZ | -0.65148 | 0.111226 | b  |
| Protein-tyrosine-phosphatase                    | EZ | -0.74297 | 0.213704 | b  |
| Protochlorophyllide reductase                   | AZ | -0.86411 | 0.157224 | b  |
| Protochlorophyllide reductase                   | BZ | -0.98887 | 0.108688 | b  |
| Protochlorophyllide reductase                   | CZ | 0.564278 | 0.082263 | a  |
| Protochlorophyllide reductase                   | DZ | 0.78982  | 0.094512 | a  |
| Protochlorophyllide reductase                   | EZ | 0.498889 | 0.204899 | a  |
| Proton-exporting ATPase                         | AZ | 0.699411 | 0.128366 | a  |
| Proton-exporting ATPase                         | BZ | 0.892786 | 0.034336 | a  |
| Proton-exporting ATPase                         | CZ | 0.003824 | 0.135273 | ab |
| Proton-exporting ATPase                         | DZ | -0.92519 | 0.156133 | b  |
| Proton-exporting ATPase                         | EZ | -0.67083 | 0.223729 | b  |
| Purine nucleosidase                             | AZ | -0.73978 | 0.099277 | b  |
| Purine nucleosidase                             | BZ | -0.87422 | 0.033381 | b  |
| Purine nucleosidase                             | CZ | 0.164817 | 0.09851  | ab |
| Purine nucleosidase                             | DZ | 0.698308 | 0.217699 | a  |
| Purine nucleosidase                             | EZ | 0.750876 | 0.228965 | a  |
| Purine-nucleoside phosphorylase                 | AZ | 0.776691 | 0.075686 | a  |
| Purine-nucleoside phosphorylase                 | BZ | 0.859228 | 0.023168 | a  |
| Purine-nucleoside phosphorylase                 | CZ | -0.31806 | 0.16464  | b  |

|                                              |    |          |          |    |
|----------------------------------------------|----|----------|----------|----|
| Purine-nucleoside phosphorylase              | DZ | -0.86841 | 0.236057 | b  |
| Purine-nucleoside phosphorylase              | EZ | -0.44944 | 0.175967 | b  |
| Pyridoxal 5'-phosphate synthase              | AZ | -0.93183 | 0.15888  | b  |
| Pyridoxal 5'-phosphate synthase              | BZ | -0.89697 | 0.100521 | b  |
| Pyridoxal 5'-phosphate synthase              | CZ | 0.575055 | 0.11047  | a  |
| Pyridoxal 5'-phosphate synthase              | DZ | 0.795711 | 0.051587 | a  |
| Pyridoxal 5'-phosphate synthase              | EZ | 0.458035 | 0.217859 | a  |
| Pyridoxal kinase                             | AZ | 0.850922 | 0.101775 | a  |
| Pyridoxal kinase                             | BZ | 0.979431 | 0.033966 | a  |
| Pyridoxal kinase                             | CZ | -0.40893 | 0.173562 | b  |
| Pyridoxal kinase                             | DZ | -0.74565 | 0.116958 | b  |
| Pyridoxal kinase                             | EZ | -0.67578 | 0.203772 | b  |
| Pyridoxine 4-dehydrogenase                   | AZ | -0.88195 | 0.133885 | b  |
| Pyridoxine 4-dehydrogenase                   | BZ | -1.00674 | 0.046718 | b  |
| Pyridoxine 4-dehydrogenase                   | CZ | 0.450612 | 0.132336 | a  |
| Pyridoxine 4-dehydrogenase                   | DZ | 0.891107 | 0.086287 | a  |
| Pyridoxine 4-dehydrogenase                   | EZ | 0.546968 | 0.201374 | a  |
| Pyroglutamyl-peptidase I                     | AZ | 0.82042  | 0.1135   | a  |
| Pyroglutamyl-peptidase I                     | BZ | 0.922587 | 0.03714  | a  |
| Pyroglutamyl-peptidase I                     | CZ | -0.39832 | 0.159725 | b  |
| Pyroglutamyl-peptidase I                     | DZ | -0.85429 | 0.115261 | b  |
| Pyroglutamyl-peptidase I                     | EZ | -0.49041 | 0.232982 | b  |
| Pyrroline-5-carboxylate reductase            | AZ | -0.77961 | 0.125426 | b  |
| Pyrroline-5-carboxylate reductase            | BZ | -0.92557 | 0.040358 | b  |
| Pyrroline-5-carboxylate reductase            | CZ | 0.774984 | 0.20042  | a  |
| Pyrroline-5-carboxylate reductase            | DZ | 0.319155 | 0.125875 | a  |
| Pyrroline-5-carboxylate reductase            | EZ | 0.611045 | 0.199025 | a  |
| Pyruvate decarboxylase                       | AZ | -0.91835 | 0.149848 | b  |
| Pyruvate decarboxylase                       | BZ | -0.91649 | 0.105571 | b  |
| Pyruvate decarboxylase                       | CZ | 0.577368 | 0.103699 | a  |
| Pyruvate decarboxylase                       | DZ | 0.765391 | 0.062963 | a  |
| Pyruvate decarboxylase                       | EZ | 0.492081 | 0.222374 | a  |
| Pyruvate dehydrogenase (acetyl-transferring) | AZ | 0.886897 | 0.100128 | a  |
| Pyruvate dehydrogenase (acetyl-transferring) | BZ | 0.965368 | 0.033319 | a  |
| Pyruvate dehydrogenase (acetyl-transferring) | CZ | -0.44174 | 0.180988 | b  |
| Pyruvate dehydrogenase (acetyl-transferring) | DZ | -0.73632 | 0.090942 | b  |
| Pyruvate dehydrogenase (acetyl-transferring) | EZ | -0.67421 | 0.205713 | b  |
| Pyruvate kinase                              | AZ | 0.866802 | 0.103111 | a  |
| Pyruvate kinase                              | BZ | 0.962972 | 0.033353 | a  |
| Pyruvate kinase                              | CZ | -0.38555 | 0.173323 | b  |
| Pyruvate kinase                              | DZ | -0.76463 | 0.109365 | b  |
| Pyruvate kinase                              | EZ | -0.67959 | 0.206309 | b  |
| Quercetin 3-O-methyltransferase              | AZ | -0.70801 | 0.134451 | bc |
| Quercetin 3-O-methyltransferase              | BZ | -0.92827 | 0.14134  | c  |

|                                      |    |          |          |    |
|--------------------------------------|----|----------|----------|----|
| Quercetin 3-O-methyltransferase      | CZ | 0.250258 | 0.186484 | ab |
| Quercetin 3-O-methyltransferase      | DZ | 0.693414 | 0.068034 | a  |
| Quercetin 3-O-methyltransferase      | EZ | 0.69261  | 0.207929 | a  |
| Quinol--cytochrome-c reductase       | AZ | 0.840608 | 0.084551 | a  |
| Quinol--cytochrome-c reductase       | BZ | 0.923206 | 0.026059 | a  |
| Quinol--cytochrome-c reductase       | CZ | -0.46819 | 0.202037 | b  |
| Quinol--cytochrome-c reductase       | DZ | -0.63904 | 0.141662 | b  |
| Quinol--cytochrome-c reductase       | EZ | -0.65658 | 0.201009 | b  |
| Ribitol 2-dehydrogenase              | AZ | -0.88722 | 0.164658 | b  |
| Ribitol 2-dehydrogenase              | BZ | -0.87907 | 0.098982 | b  |
| Ribitol 2-dehydrogenase              | CZ | 0.503876 | 0.108686 | a  |
| Ribitol 2-dehydrogenase              | DZ | 0.748873 | 0.088523 | a  |
| Ribitol 2-dehydrogenase              | EZ | 0.513534 | 0.226991 | a  |
| Riboflavin kinase                    | AZ | 0.805196 | 0.095328 | a  |
| Riboflavin kinase                    | BZ | 0.874263 | 0.04345  | a  |
| Riboflavin kinase                    | CZ | -0.56419 | 0.17715  | b  |
| Riboflavin kinase                    | DZ | -0.44359 | 0.190023 | b  |
| Riboflavin kinase                    | EZ | -0.67168 | 0.206369 | b  |
| Riboflavin synthase                  | AZ | 0.919729 | 0.086766 | a  |
| Riboflavin synthase                  | BZ | 0.943444 | 0.03795  | a  |
| Riboflavin synthase                  | CZ | -0.4916  | 0.19077  | b  |
| Riboflavin synthase                  | DZ | -0.76203 | 0.088147 | b  |
| Riboflavin synthase                  | EZ | -0.60954 | 0.200933 | b  |
| Ribonuclease III                     | AZ | 0.80641  | 0.120024 | a  |
| Ribonuclease III                     | BZ | 0.906396 | 0.041106 | a  |
| Ribonuclease III                     | CZ | -0.20233 | 0.168206 | b  |
| Ribonuclease III                     | DZ | -0.79852 | 0.13794  | b  |
| Ribonuclease III                     | EZ | -0.71196 | 0.20909  | b  |
| Ribonuclease P                       | AZ | 0.882085 | 0.091384 | a  |
| Ribonuclease P                       | BZ | 0.966129 | 0.028572 | a  |
| Ribonuclease P                       | CZ | -0.37796 | 0.170366 | b  |
| Ribonuclease P                       | DZ | -0.77375 | 0.11101  | b  |
| Ribonuclease P                       | EZ | -0.69651 | 0.206343 | b  |
| Ribonuclease T(1)                    | AZ | -0.8757  | 0.099626 | b  |
| Ribonuclease T(1)                    | BZ | -1.09717 | 0.084218 | b  |
| Ribonuclease T(1)                    | CZ | 0.693528 | 0.120397 | a  |
| Ribonuclease T(1)                    | DZ | 0.736839 | 0.08846  | a  |
| Ribonuclease T(1)                    | EZ | 0.542509 | 0.19031  | a  |
| Ribonuclease T(2)                    | AZ | -0.74063 | 0.137514 | b  |
| Ribonuclease T(2)                    | BZ | -0.86223 | 0.046116 | b  |
| Ribonuclease T(2)                    | CZ | 0.139229 | 0.116909 | ab |
| Ribonuclease T(2)                    | DZ | 0.821042 | 0.191821 | a  |
| Ribonuclease T(2)                    | EZ | 0.642584 | 0.220412 | a  |
| Ribonucleoside-diphosphate reductase | AZ | 0.859871 | 0.092574 | a  |

|                                               |    |          |          |    |
|-----------------------------------------------|----|----------|----------|----|
| Ribonucleoside-diphosphate reductase          | BZ | 0.956139 | 0.027798 | a  |
| Ribonucleoside-diphosphate reductase          | CZ | -0.3089  | 0.162232 | b  |
| Ribonucleoside-diphosphate reductase          | DZ | -0.77212 | 0.130171 | b  |
| Ribonucleoside-diphosphate reductase          | EZ | -0.73499 | 0.207665 | b  |
| Ribose-5-phosphate isomerase                  | AZ | -0.87156 | 0.098197 | b  |
| Ribose-5-phosphate isomerase                  | BZ | -0.96197 | 0.045695 | b  |
| Ribose-5-phosphate isomerase                  | CZ | 0.359941 | 0.112812 | a  |
| Ribose-5-phosphate isomerase                  | DZ | 0.877458 | 0.173355 | a  |
| Ribose-5-phosphate isomerase                  | EZ | 0.596138 | 0.196205 | a  |
| Ribose-phosphate diphosphokinase              | AZ | 0.857344 | 0.10419  | a  |
| Ribose-phosphate diphosphokinase              | BZ | 0.96563  | 0.030646 | a  |
| Ribose-phosphate diphosphokinase              | CZ | -0.60631 | 0.199343 | b  |
| Ribose-phosphate diphosphokinase              | DZ | -0.6029  | 0.100503 | b  |
| Ribose-phosphate diphosphokinase              | EZ | -0.61377 | 0.199004 | b  |
| Ribosomal-protein-alanine N-acetyltransferase | AZ | -0.9126  | 0.166002 | b  |
| Ribosomal-protein-alanine N-acetyltransferase | BZ | -0.53757 | 0.147183 | ab |
| Ribosomal-protein-alanine N-acetyltransferase | CZ | 0.661406 | 0.206041 | a  |
| Ribosomal-protein-alanine N-acetyltransferase | DZ | 0.612076 | 0.105216 | a  |
| Ribosomal-protein-alanine N-acetyltransferase | EZ | 0.176687 | 0.197487 | ab |
| Ribulose-phosphate 3-epimerase                | AZ | 0.866802 | 0.103111 | a  |
| Ribulose-phosphate 3-epimerase                | BZ | 0.962972 | 0.033353 | a  |
| Ribulose-phosphate 3-epimerase                | CZ | -0.38555 | 0.173323 | b  |
| Ribulose-phosphate 3-epimerase                | DZ | -0.76463 | 0.109365 | b  |
| Ribulose-phosphate 3-epimerase                | EZ | -0.67959 | 0.206309 | b  |
| RNA 3'-terminal-phosphate cyclase (ATP)       | AZ | -0.83512 | 0.127726 | b  |
| RNA 3'-terminal-phosphate cyclase (ATP)       | BZ | -0.94771 | 0.042571 | b  |
| RNA 3'-terminal-phosphate cyclase (ATP)       | CZ | 0.300702 | 0.112808 | a  |
| RNA 3'-terminal-phosphate cyclase (ATP)       | DZ | 0.909098 | 0.169    | a  |
| RNA 3'-terminal-phosphate cyclase (ATP)       | EZ | 0.573033 | 0.196331 | a  |
| RNA ligase (ATP)                              | AZ | 0.866802 | 0.103111 | a  |
| RNA ligase (ATP)                              | BZ | 0.962972 | 0.033353 | a  |
| RNA ligase (ATP)                              | CZ | -0.38555 | 0.173323 | b  |
| RNA ligase (ATP)                              | DZ | -0.76463 | 0.109365 | b  |
| RNA ligase (ATP)                              | EZ | -0.67959 | 0.206309 | b  |
| RNA uridylyltransferase                       | AZ | -0.90959 | 0.121271 | b  |
| RNA uridylyltransferase                       | BZ | -0.91939 | 0.166399 | b  |
| RNA uridylyltransferase                       | CZ | 0.669095 | 0.113269 | a  |
| RNA uridylyltransferase                       | DZ | 0.584316 | 0.092462 | a  |
| RNA uridylyltransferase                       | EZ | 0.575561 | 0.191247 | a  |
| RNA-directed DNA polymerase                   | AZ | -1.02735 | 0.188942 | b  |
| RNA-directed DNA polymerase                   | BZ | -0.81797 | 0.114007 | b  |
| RNA-directed DNA polymerase                   | CZ | 0.707881 | 0.103596 | a  |
| RNA-directed DNA polymerase                   | DZ | 0.749693 | 0.098763 | a  |
| RNA-directed DNA polymerase                   | EZ | 0.387743 | 0.154652 | a  |

|                                                           |    |          |          |   |
|-----------------------------------------------------------|----|----------|----------|---|
| S-formylglutathione hydrolase                             | AZ | -0.95534 | 0.149077 | b |
| S-formylglutathione hydrolase                             | BZ | -0.92431 | 0.123801 | b |
| S-formylglutathione hydrolase                             | CZ | 0.657878 | 0.139123 | a |
| S-formylglutathione hydrolase                             | DZ | 0.758671 | 0.057479 | a |
| S-formylglutathione hydrolase                             | EZ | 0.463103 | 0.174058 | a |
| S-methyl-5-thioribose-1-phosphate isomerase               | AZ | -0.88886 | 0.086899 | b |
| S-methyl-5-thioribose-1-phosphate isomerase               | BZ | -1.11655 | 0.075601 | b |
| S-methyl-5-thioribose-1-phosphate isomerase               | CZ | 0.697441 | 0.112973 | a |
| S-methyl-5-thioribose-1-phosphate isomerase               | DZ | 0.743929 | 0.089425 | a |
| S-methyl-5-thioribose-1-phosphate isomerase               | EZ | 0.564043 | 0.190355 | a |
| S-methyl-5'-thioadenosine phosphorylase                   | AZ | 0.918304 | 0.097832 | a |
| S-methyl-5'-thioadenosine phosphorylase                   | BZ | 0.897011 | 0.063389 | a |
| S-methyl-5'-thioadenosine phosphorylase                   | CZ | -0.42035 | 0.203763 | b |
| S-methyl-5'-thioadenosine phosphorylase                   | DZ | -0.85549 | 0.069863 | b |
| S-methyl-5'-thioadenosine phosphorylase                   | EZ | -0.53947 | 0.193999 | b |
| Saccharolysin                                             | AZ | -0.88637 | 0.166599 | b |
| Saccharolysin                                             | BZ | -0.91336 | 0.09465  | b |
| Saccharolysin                                             | CZ | 0.495308 | 0.113807 | a |
| Saccharolysin                                             | DZ | 0.82173  | 0.05449  | a |
| Saccharolysin                                             | EZ | 0.482695 | 0.220663 | a |
| Saccharopine dehydrogenase (NAD(+), L-lysine-forming)     | AZ | 0.905016 | 0.098152 | a |
| Saccharopine dehydrogenase (NAD(+), L-lysine-forming)     | BZ | 0.902619 | 0.062589 | a |
| Saccharopine dehydrogenase (NAD(+), L-lysine-forming)     | CZ | -0.3993  | 0.202093 | b |
| Saccharopine dehydrogenase (NAD(+), L-lysine-forming)     | DZ | -0.89303 | 0.078605 | b |
| Saccharopine dehydrogenase (NAD(+), L-lysine-forming)     | EZ | -0.5153  | 0.191353 | b |
| Saccharopine dehydrogenase (NADP(+), L-glutamate-forming) | AZ | 0.808766 | 0.082495 | a |
| Saccharopine dehydrogenase (NADP(+), L-glutamate-forming) | BZ | 0.883095 | 0.020419 | a |
| Saccharopine dehydrogenase (NADP(+), L-glutamate-forming) | CZ | -0.65106 | 0.281665 | b |
| Saccharopine dehydrogenase (NADP(+), L-glutamate-forming) | DZ | -0.61126 | 0.079686 | b |
| Saccharopine dehydrogenase (NADP(+), L-glutamate-forming) | EZ | -0.42955 | 0.162153 | b |
| Salicylate 1-monoxygenase                                 | AZ | -0.91529 | 0.162077 | b |
| Salicylate 1-monoxygenase                                 | BZ | -0.89583 | 0.098679 | b |
| Salicylate 1-monoxygenase                                 | CZ | 0.536406 | 0.103148 | a |
| Salicylate 1-monoxygenase                                 | DZ | 0.812896 | 0.052452 | a |
| Salicylate 1-monoxygenase                                 | EZ | 0.461811 | 0.224722 | a |
| Sarcosine oxidase                                         | AZ | -0.9228  | 0.168044 | b |
| Sarcosine oxidase                                         | BZ | -0.82627 | 0.102435 | b |
| Sarcosine oxidase                                         | CZ | 0.602877 | 0.13948  | a |
| Sarcosine oxidase                                         | DZ | 0.708048 | 0.044679 | a |
| Sarcosine oxidase                                         | EZ | 0.438138 | 0.224201 | a |
| Sedoheptulose-bisphosphatase                              | AZ | -0.84027 | 0.169001 | b |
| Sedoheptulose-bisphosphatase                              | BZ | -0.98188 | 0.08269  | b |
| Sedoheptulose-bisphosphatase                              | CZ | 0.640626 | 0.104378 | a |
| Sedoheptulose-bisphosphatase                              | DZ | 0.850274 | 0.104951 | a |

|                                                                |    |          |          |    |
|----------------------------------------------------------------|----|----------|----------|----|
| Sedoheptulose-bisphosphatase                                   | EZ | 0.331254 | 0.192429 | a  |
| Selenocysteine lyase                                           | AZ | -0.78851 | 0.208289 | c  |
| Selenocysteine lyase                                           | BZ | -0.7261  | 0.136522 | bc |
| Selenocysteine lyase                                           | CZ | 0.420987 | 0.162662 | ab |
| Selenocysteine lyase                                           | DZ | 0.716772 | 0.0706   | a  |
| Selenocysteine lyase                                           | EZ | 0.376843 | 0.217798 | ab |
| Sepiapterin reductase (L-erythro-7,8-dihydrobiopterin forming) | AZ | -0.58234 | 0.053899 | bc |
| Sepiapterin reductase (L-erythro-7,8-dihydrobiopterin forming) | BZ | -0.99609 | 0.145845 | c  |
| Sepiapterin reductase (L-erythro-7,8-dihydrobiopterin forming) | CZ | 0.626285 | 0.015944 | a  |
| Sepiapterin reductase (L-erythro-7,8-dihydrobiopterin forming) | DZ | 0.063598 | 0.255091 | ab |
| Sepiapterin reductase (L-erythro-7,8-dihydrobiopterin forming) | EZ | 0.888551 | 0.156979 | a  |
| Serine C-palmitoyltransferase                                  | AZ | 0.822052 | 0.104426 | a  |
| Serine C-palmitoyltransferase                                  | BZ | 0.979212 | 0.023924 | a  |
| Serine C-palmitoyltransferase                                  | CZ | -0.38339 | 0.17008  | b  |
| Serine C-palmitoyltransferase                                  | DZ | -0.67795 | 0.127074 | b  |
| Serine C-palmitoyltransferase                                  | EZ | -0.73992 | 0.20979  | b  |
| Serine O-acetyltransferase                                     | AZ | -0.87917 | 0.086704 | b  |
| Serine O-acetyltransferase                                     | BZ | -1.15484 | 0.05978  | b  |
| Serine O-acetyltransferase                                     | CZ | 0.722806 | 0.106329 | a  |
| Serine O-acetyltransferase                                     | DZ | 0.644496 | 0.091649 | a  |
| Serine O-acetyltransferase                                     | EZ | 0.666712 | 0.186432 | a  |
| Serine--tRNA ligase                                            | AZ | 0.900887 | 0.102398 | a  |
| Serine--tRNA ligase                                            | BZ | 0.933044 | 0.048854 | a  |
| Serine--tRNA ligase                                            | CZ | -0.41182 | 0.188129 | b  |
| Serine--tRNA ligase                                            | DZ | -0.80109 | 0.081168 | b  |
| Serine--tRNA ligase                                            | EZ | -0.62102 | 0.202949 | b  |
| Shikimate O-hydroxycinnamoyltransferase                        | AZ | -0.91512 | 0.126729 | b  |
| Shikimate O-hydroxycinnamoyltransferase                        | BZ | -0.89837 | 0.177292 | b  |
| Shikimate O-hydroxycinnamoyltransferase                        | CZ | 0.649433 | 0.103929 | a  |
| Shikimate O-hydroxycinnamoyltransferase                        | DZ | 0.55261  | 0.083907 | a  |
| Shikimate O-hydroxycinnamoyltransferase                        | EZ | 0.611446 | 0.193364 | a  |
| Signal peptidase I                                             | AZ | 0.884217 | 0.079288 | a  |
| Signal peptidase I                                             | BZ | 0.962615 | 0.023938 | a  |
| Signal peptidase I                                             | CZ | -0.38384 | 0.16995  | b  |
| Signal peptidase I                                             | DZ | -0.75873 | 0.132019 | b  |
| Signal peptidase I                                             | EZ | -0.70426 | 0.201135 | b  |
| Site-specific DNA-methyltransferase (adenine-specific)         | AZ | 0.856111 | 0.08184  | a  |
| Site-specific DNA-methyltransferase (adenine-specific)         | BZ | 0.919426 | 0.029091 | a  |
| Site-specific DNA-methyltransferase (adenine-specific)         | CZ | -0.46103 | 0.207462 | b  |
| Site-specific DNA-methyltransferase (adenine-specific)         | DZ | -0.68163 | 0.125689 | b  |
| Site-specific DNA-methyltransferase (adenine-specific)         | EZ | -0.63288 | 0.202038 | b  |
| Sodium/potassium-exchanging ATPase                             | AZ | 0.835335 | 0.056305 | a  |
| Sodium/potassium-exchanging ATPase                             | BZ | 0.902473 | 0.014843 | a  |
| Sodium/potassium-exchanging ATPase                             | CZ | -0.10518 | 0.142421 | b  |



|                                    |    |          |          |   |
|------------------------------------|----|----------|----------|---|
| Sodium/potassium-exchanging ATPase | DZ | -0.80794 | 0.174168 | b |
| Sodium/potassium-exchanging ATPase | EZ | -0.82469 | 0.207804 | b |
| Spermidine synthase                | AZ | 0.866802 | 0.103111 | a |
| Spermidine synthase                | BZ | 0.962972 | 0.033353 | a |
| Spermidine synthase                | CZ | -0.38555 | 0.173323 | b |
| Spermidine synthase                | DZ | -0.76463 | 0.109365 | b |
| Spermidine synthase                | EZ | -0.67959 | 0.206309 | b |
| Sphinganine kinase                 | AZ | 0.816988 | 0.113477 | a |
| Sphinganine kinase                 | BZ | 0.921547 | 0.037116 | a |
| Sphinganine kinase                 | CZ | -0.17017 | 0.1783   | b |
| Sphinganine kinase                 | DZ | -0.91222 | 0.113475 | b |
| Sphinganine kinase                 | EZ | -0.65614 | 0.201644 | b |
| Sphinganine-1-phosphate aldolase   | AZ | 0.866729 | 0.104702 | a |
| Sphinganine-1-phosphate aldolase   | BZ | 0.964329 | 0.033866 | a |
| Sphinganine-1-phosphate aldolase   | CZ | -0.40344 | 0.175676 | b |
| Sphinganine-1-phosphate aldolase   | DZ | -0.77754 | 0.108884 | b |
| Sphinganine-1-phosphate aldolase   | EZ | -0.65008 | 0.204006 | b |
| Sphingomyelin phosphodiesterase    | AZ | 0.784268 | 0.098971 | a |
| Sphingomyelin phosphodiesterase    | BZ | 0.903019 | 0.036847 | a |
| Sphingomyelin phosphodiesterase    | CZ | -0.32121 | 0.175714 | b |
| Sphingomyelin phosphodiesterase    | DZ | -0.52108 | 0.120714 | b |
| Sphingomyelin phosphodiesterase    | EZ | -0.84499 | 0.239662 | b |
| Sphingosine N-acyltransferase      | AZ | 0.871711 | 0.118024 | a |
| Sphingosine N-acyltransferase      | BZ | 0.943056 | 0.04701  | a |
| Sphingosine N-acyltransferase      | CZ | -0.20518 | 0.132939 | b |
| Sphingosine N-acyltransferase      | DZ | -0.9022  | 0.088279 | b |
| Sphingosine N-acyltransferase      | EZ | -0.70739 | 0.219339 | b |
| Squalene synthase                  | AZ | 0.882667 | 0.101383 | a |
| Squalene synthase                  | BZ | 0.954955 | 0.033277 | a |
| Squalene synthase                  | CZ | -0.39173 | 0.172807 | b |
| Squalene synthase                  | DZ | -0.75978 | 0.107282 | b |
| Squalene synthase                  | EZ | -0.68611 | 0.206439 | b |
| Sterol 24-C-methyltransferase      | AZ | -0.92044 | 0.100147 | b |
| Sterol 24-C-methyltransferase      | BZ | -0.96568 | 0.043471 | b |
| Sterol 24-C-methyltransferase      | CZ | 0.420465 | 0.147305 | a |
| Sterol 24-C-methyltransferase      | DZ | 0.959789 | 0.102555 | a |
| Sterol 24-C-methyltransferase      | EZ | 0.505864 | 0.197947 | a |
| Sterol 3-beta-glucosyltransferase  | AZ | -0.9213  | 0.106494 | b |
| Sterol 3-beta-glucosyltransferase  | BZ | -0.95023 | 0.042517 | b |
| Sterol 3-beta-glucosyltransferase  | CZ | 0.515673 | 0.160163 | a |
| Sterol 3-beta-glucosyltransferase  | DZ | 0.623076 | 0.085367 | a |
| Sterol 3-beta-glucosyltransferase  | EZ | 0.732782 | 0.216263 | a |
| Sterol esterase                    | AZ | -0.95619 | 0.126852 | b |
| Sterol esterase                    | BZ | -0.89137 | 0.160598 | b |

|                                                   |    |          |          |    |
|---------------------------------------------------|----|----------|----------|----|
| Sterol esterase                                   | CZ | 0.658516 | 0.120518 | a  |
| Sterol esterase                                   | DZ | 0.682299 | 0.066149 | a  |
| Sterol esterase                                   | EZ | 0.506755 | 0.18967  | a  |
| Sterol O-acyltransferase                          | AZ | -0.62241 | 0.116318 | b  |
| Sterol O-acyltransferase                          | BZ | -0.86753 | 0.050499 | b  |
| Sterol O-acyltransferase                          | CZ | 0.167094 | 0.139309 | ab |
| Sterol O-acyltransferase                          | DZ | 0.547991 | 0.216053 | a  |
| Sterol O-acyltransferase                          | EZ | 0.774859 | 0.233244 | a  |
| Succinate dehydrogenase (quinone)                 | AZ | 0.866777 | 0.088934 | a  |
| Succinate dehydrogenase (quinone)                 | BZ | 0.97725  | 0.025184 | a  |
| Succinate dehydrogenase (quinone)                 | CZ | -0.57324 | 0.181209 | b  |
| Succinate dehydrogenase (quinone)                 | DZ | -0.63531 | 0.128612 | b  |
| Succinate dehydrogenase (quinone)                 | EZ | -0.63548 | 0.1999   | b  |
| Succinate--CoA ligase (ADP-forming)               | AZ | 0.815463 | 0.054468 | a  |
| Succinate--CoA ligase (ADP-forming)               | BZ | 0.875371 | 0.015079 | a  |
| Succinate--CoA ligase (ADP-forming)               | CZ | -0.03028 | 0.133324 | ab |
| Succinate--CoA ligase (ADP-forming)               | DZ | -0.86765 | 0.197284 | b  |
| Succinate--CoA ligase (ADP-forming)               | EZ | -0.7929  | 0.198559 | b  |
| Succinate--CoA ligase (GDP-forming)               | AZ | -0.84226 | 0.124374 | b  |
| Succinate--CoA ligase (GDP-forming)               | BZ | -0.88413 | 0.057063 | b  |
| Succinate--CoA ligase (GDP-forming)               | CZ | 0.450103 | 0.18477  | a  |
| Succinate--CoA ligase (GDP-forming)               | DZ | 0.826343 | 0.155507 | a  |
| Succinate--CoA ligase (GDP-forming)               | EZ | 0.449945 | 0.184401 | a  |
| Succinate--hydroxymethylglutarate CoA-transferase | AZ | -0.89823 | 0.109463 | b  |
| Succinate--hydroxymethylglutarate CoA-transferase | BZ | -0.97781 | 0.146137 | b  |
| Succinate--hydroxymethylglutarate CoA-transferase | CZ | 0.658889 | 0.126298 | a  |
| Succinate--hydroxymethylglutarate CoA-transferase | DZ | 0.678782 | 0.085856 | a  |
| Succinate--hydroxymethylglutarate CoA-transferase | EZ | 0.538361 | 0.189626 | a  |
| Succinate-semialdehyde dehydrogenase (NAD(+))     | AZ | -0.8909  | 0.11335  | b  |
| Succinate-semialdehyde dehydrogenase (NAD(+))     | BZ | -1.10688 | 0.05224  | b  |
| Succinate-semialdehyde dehydrogenase (NAD(+))     | CZ | 0.774978 | 0.094584 | a  |
| Succinate-semialdehyde dehydrogenase (NAD(+))     | DZ | 0.732305 | 0.082829 | a  |
| Succinate-semialdehyde dehydrogenase (NAD(+))     | EZ | 0.490496 | 0.196975 | a  |
| Succinate-semialdehyde dehydrogenase (NAD(P)(+))  | AZ | -0.75558 | 0.131723 | b  |
| Succinate-semialdehyde dehydrogenase (NAD(P)(+))  | BZ | -0.87632 | 0.057549 | b  |
| Succinate-semialdehyde dehydrogenase (NAD(P)(+))  | CZ | 0.473388 | 0.220339 | a  |
| Succinate-semialdehyde dehydrogenase (NAD(P)(+))  | DZ | 0.719918 | 0.157129 | a  |
| Succinate-semialdehyde dehydrogenase (NAD(P)(+))  | EZ | 0.438591 | 0.180054 | a  |
| Sucrose-phosphate synthase                        | AZ | -1.07777 | 0.166962 | c  |
| Sucrose-phosphate synthase                        | BZ | -0.48483 | 0.115813 | bc |
| Sucrose-phosphate synthase                        | CZ | 0.2197   | 0.151521 | ab |
| Sucrose-phosphate synthase                        | DZ | 1.036309 | 0.048744 | a  |
| Sucrose-phosphate synthase                        | EZ | 0.306586 | 0.206724 | ab |
| Sulfate adenyltransferase                         | AZ | 0.866802 | 0.103111 | a  |

|                                   |    |          |          |   |
|-----------------------------------|----|----------|----------|---|
| Sulfate adenylyltransferase       | BZ | 0.962972 | 0.033353 | a |
| Sulfate adenylyltransferase       | CZ | -0.38555 | 0.173323 | b |
| Sulfate adenylyltransferase       | DZ | -0.76463 | 0.109365 | b |
| Sulfate adenylyltransferase       | EZ | -0.67959 | 0.206309 | b |
| Superoxide dismutase              | AZ | 0.898702 | 0.080973 | a |
| Superoxide dismutase              | BZ | 0.922802 | 0.043786 | a |
| Superoxide dismutase              | CZ | -0.69144 | 0.224337 | b |
| Superoxide dismutase              | DZ | -0.62913 | 0.051937 | b |
| Superoxide dismutase              | EZ | -0.50094 | 0.198239 | b |
| Tartrate dehydrogenase            | AZ | -0.88856 | 0.183777 | b |
| Tartrate dehydrogenase            | BZ | -0.77857 | 0.112058 | b |
| Tartrate dehydrogenase            | CZ | 0.533477 | 0.115542 | a |
| Tartrate dehydrogenase            | DZ | 0.648273 | 0.06617  | a |
| Tartrate dehydrogenase            | EZ | 0.485386 | 0.24317  | a |
| Taurine dioxygenase               | AZ | -0.85107 | 0.089108 | b |
| Taurine dioxygenase               | BZ | -1.17249 | 0.053158 | b |
| Taurine dioxygenase               | CZ | 0.744426 | 0.114534 | a |
| Taurine dioxygenase               | DZ | 0.664467 | 0.10014  | a |
| Taurine dioxygenase               | EZ | 0.614673 | 0.180164 | a |
| Tetrahydroxynaphthalene reductase | AZ | -0.9181  | 0.130935 | b |
| Tetrahydroxynaphthalene reductase | BZ | -0.88241 | 0.183957 | b |
| Tetrahydroxynaphthalene reductase | CZ | 0.634034 | 0.096733 | a |
| Tetrahydroxynaphthalene reductase | DZ | 0.52718  | 0.077986 | a |
| Tetrahydroxynaphthalene reductase | EZ | 0.639301 | 0.195108 | a |
| Thiamine diphosphokinase          | AZ | 0.864973 | 0.024133 | a |
| Thiamine diphosphokinase          | BZ | 0.963909 | 0.060995 | a |
| Thiamine diphosphokinase          | CZ | -0.45631 | 0.116133 | b |
| Thiamine diphosphokinase          | DZ | -0.81821 | 0.19672  | b |
| Thiamine diphosphokinase          | EZ | -0.55437 | 0.200988 | b |
| Thimet oligopeptidase             | AZ | 0.835083 | 0.040204 | a |
| Thimet oligopeptidase             | BZ | 0.883621 | 0.010458 | a |
| Thimet oligopeptidase             | CZ | -0.14654 | 0.161629 | b |
| Thimet oligopeptidase             | DZ | -0.73186 | 0.183458 | b |
| Thimet oligopeptidase             | EZ | -0.8403  | 0.203534 | b |
| Thiol oxidase                     | AZ | -0.91701 | 0.122578 | b |
| Thiol oxidase                     | BZ | -0.94592 | 0.148203 | b |
| Thiol oxidase                     | CZ | 0.623185 | 0.1217   | a |
| Thiol oxidase                     | DZ | 0.74728  | 0.079514 | a |
| Thiol oxidase                     | EZ | 0.492468 | 0.188753 | a |
| Thiopurine S-methyltransferase    | AZ | -0.8771  | 0.134277 | b |
| Thiopurine S-methyltransferase    | BZ | -0.83881 | 0.178408 | b |
| Thiopurine S-methyltransferase    | CZ | 0.673142 | 0.135806 | a |
| Thiopurine S-methyltransferase    | DZ | 0.607619 | 0.112769 | a |
| Thiopurine S-methyltransferase    | EZ | 0.435147 | 0.186416 | a |

|                                                 |    |          |          |   |
|-------------------------------------------------|----|----------|----------|---|
| Thiosulfate sulfurtransferase                   | AZ | 0.838686 | 0.086023 | a |
| Thiosulfate sulfurtransferase                   | BZ | 0.903762 | 0.027048 | a |
| Thiosulfate sulfurtransferase                   | CZ | -0.64255 | 0.237478 | b |
| Thiosulfate sulfurtransferase                   | DZ | -0.54647 | 0.103064 | b |
| Thiosulfate sulfurtransferase                   | EZ | -0.55343 | 0.194814 | b |
| Threonine--tRNA ligase                          | AZ | 0.785599 | 0.140446 | a |
| Threonine--tRNA ligase                          | BZ | 0.970555 | 0.038031 | a |
| Threonine--tRNA ligase                          | CZ | -0.44283 | 0.195748 | b |
| Threonine--tRNA ligase                          | DZ | -0.71725 | 0.099068 | b |
| Threonine--tRNA ligase                          | EZ | -0.59608 | 0.198613 | b |
| Thromboxane-A synthase                          | AZ | -0.77538 | 0.15744  | b |
| Thromboxane-A synthase                          | BZ | -0.9576  | 0.118609 | b |
| Thromboxane-A synthase                          | CZ | 0.487072 | 0.090306 | a |
| Thromboxane-A synthase                          | DZ | 0.736971 | 0.095688 | a |
| Thromboxane-A synthase                          | EZ | 0.508941 | 0.236544 | a |
| Thymidylate synthase                            | AZ | 0.893788 | 0.084005 | a |
| Thymidylate synthase                            | BZ | 0.963543 | 0.027262 | a |
| Thymidylate synthase                            | CZ | -0.37462 | 0.1691   | b |
| Thymidylate synthase                            | DZ | -0.77873 | 0.117569 | b |
| Thymidylate synthase                            | EZ | -0.70398 | 0.203228 | b |
| Tocopherol O-methyltransferase                  | AZ | -0.84934 | 0.174568 | b |
| Tocopherol O-methyltransferase                  | BZ | -0.97066 | 0.077019 | b |
| Tocopherol O-methyltransferase                  | CZ | 0.592773 | 0.100238 | a |
| Tocopherol O-methyltransferase                  | DZ | 0.875237 | 0.106271 | a |
| Tocopherol O-methyltransferase                  | EZ | 0.35199  | 0.192377 | a |
| Trans-1,2-dihydrobenzene-1,2-diol dehydrogenase | AZ | -0.93262 | 0.157576 | b |
| Trans-1,2-dihydrobenzene-1,2-diol dehydrogenase | BZ | -0.86792 | 0.09442  | b |
| Trans-1,2-dihydrobenzene-1,2-diol dehydrogenase | CZ | 0.545586 | 0.129898 | a |
| Trans-1,2-dihydrobenzene-1,2-diol dehydrogenase | DZ | 0.804502 | 0.04658  | a |
| Trans-1,2-dihydrobenzene-1,2-diol dehydrogenase | EZ | 0.450448 | 0.220611 | a |
| Trans-2-enoyl-CoA reductase (NADPH)             | AZ | -0.79617 | 0.129543 | b |
| Trans-2-enoyl-CoA reductase (NADPH)             | BZ | -0.91291 | 0.050173 | b |
| Trans-2-enoyl-CoA reductase (NADPH)             | CZ | 0.651287 | 0.148972 | a |
| Trans-2-enoyl-CoA reductase (NADPH)             | DZ | 0.565479 | 0.186015 | a |
| Trans-2-enoyl-CoA reductase (NADPH)             | EZ | 0.492315 | 0.203044 | a |
| Trans-L-3-hydroxyproline dehydratase            | AZ | -0.87495 | 0.09083  | b |
| Trans-L-3-hydroxyproline dehydratase            | BZ | -1.14857 | 0.057719 | b |
| Trans-L-3-hydroxyproline dehydratase            | CZ | 0.750665 | 0.108658 | a |
| Trans-L-3-hydroxyproline dehydratase            | DZ | 0.651409 | 0.096984 | a |
| Trans-L-3-hydroxyproline dehydratase            | EZ | 0.621452 | 0.185112 | a |
| Transaldolase                                   | AZ | -0.91787 | 0.06319  | b |
| Transaldolase                                   | BZ | -0.91369 | 0.032196 | b |
| Transaldolase                                   | CZ | 0.69238  | 0.196832 | a |
| Transaldolase                                   | DZ | 0.589256 | 0.147162 | a |

|                                                              |    |          |          |    |
|--------------------------------------------------------------|----|----------|----------|----|
| Transaldolase                                                | EZ | 0.549932 | 0.185075 | a  |
| Transketolase                                                | AZ | -0.76619 | 0.134022 | b  |
| Transketolase                                                | BZ | -0.78831 | 0.079612 | b  |
| Transketolase                                                | CZ | 0.336177 | 0.191218 | a  |
| Transketolase                                                | DZ | 0.425695 | 0.156394 | a  |
| Transketolase                                                | EZ | 0.792623 | 0.219382 | a  |
| Triacylglycerol lipase                                       | AZ | 0.739139 | 0.135567 | a  |
| Triacylglycerol lipase                                       | BZ | 0.828585 | 0.050051 | a  |
| Triacylglycerol lipase                                       | CZ | -0.14458 | 0.212314 | ab |
| Triacylglycerol lipase                                       | DZ | -0.87245 | 0.135059 | b  |
| Triacylglycerol lipase                                       | EZ | -0.55069 | 0.19972  | b  |
| Trimethyllysine dioxygenase                                  | AZ | 0.724547 | 0.097116 | ab |
| Trimethyllysine dioxygenase                                  | BZ | 0.935188 | 0.043041 | a  |
| Trimethyllysine dioxygenase                                  | CZ | -0.19898 | 0.147599 | bc |
| Trimethyllysine dioxygenase                                  | DZ | -0.80715 | 0.21646  | c  |
| Trimethyllysine dioxygenase                                  | EZ | -0.6536  | 0.18489  | c  |
| Triose-phosphate isomerase                                   | AZ | -0.72986 | 0.104502 | bc |
| Triose-phosphate isomerase                                   | BZ | -0.95087 | 0.057028 | c  |
| Triose-phosphate isomerase                                   | CZ | 0.119072 | 0.06577  | ab |
| Triose-phosphate isomerase                                   | DZ | 0.848019 | 0.218178 | a  |
| Triose-phosphate isomerase                                   | EZ | 0.713643 | 0.199817 | a  |
| Tripeptidyl-peptidase I                                      | AZ | -0.90782 | 0.167084 | b  |
| Tripeptidyl-peptidase I                                      | BZ | -0.90856 | 0.097864 | b  |
| Tripeptidyl-peptidase I                                      | CZ | 0.492704 | 0.095626 | a  |
| Tripeptidyl-peptidase I                                      | DZ | 0.840539 | 0.04869  | a  |
| Tripeptidyl-peptidase I                                      | EZ | 0.483142 | 0.222204 | a  |
| Tripeptidyl-peptidase II                                     | AZ | 0.83489  | 0.044881 | a  |
| Tripeptidyl-peptidase II                                     | BZ | 0.88892  | 0.011741 | a  |
| Tripeptidyl-peptidase II                                     | CZ | -0.23084 | 0.174805 | b  |
| Tripeptidyl-peptidase II                                     | DZ | -0.75841 | 0.192929 | b  |
| Tripeptidyl-peptidase II                                     | EZ | -0.73456 | 0.193147 | b  |
| tRNA (5-methylaminomethyl-2-thiouridylate)-methyltransferase | AZ | 0.826436 | 0.068731 | a  |
| tRNA (5-methylaminomethyl-2-thiouridylate)-methyltransferase | BZ | 0.908883 | 0.018242 | a  |
| tRNA (5-methylaminomethyl-2-thiouridylate)-methyltransferase | CZ | -0.19872 | 0.161896 | b  |
| tRNA (5-methylaminomethyl-2-thiouridylate)-methyltransferase | DZ | -0.84935 | 0.180507 | b  |
| tRNA (5-methylaminomethyl-2-thiouridylate)-methyltransferase | EZ | -0.68725 | 0.197578 | b  |
| tRNA (guanine(46)-N(7))-methyltransferase                    | AZ | 0.862186 | 0.100593 | a  |
| tRNA (guanine(46)-N(7))-methyltransferase                    | BZ | 0.959563 | 0.032281 | a  |
| tRNA (guanine(46)-N(7))-methyltransferase                    | CZ | -0.36439 | 0.170408 | b  |
| tRNA (guanine(46)-N(7))-methyltransferase                    | DZ | -0.74282 | 0.108914 | b  |
| tRNA (guanine(46)-N(7))-methyltransferase                    | EZ | -0.71454 | 0.212074 | b  |
| tRNA (guanosine(18)-2'-O)-methyltransferase                  | AZ | -0.7774  | 0.187167 | b  |
| tRNA (guanosine(18)-2'-O)-methyltransferase                  | BZ | -0.84381 | 0.144698 | b  |
| tRNA (guanosine(18)-2'-O)-methyltransferase                  | CZ | 0.495082 | 0.087418 | a  |

|                                             |    |          |          |    |
|---------------------------------------------|----|----------|----------|----|
| tRNA (guanosine(18)-2'-O)-methyltransferase | DZ | 0.516678 | 0.101196 | a  |
| tRNA (guanosine(18)-2'-O)-methyltransferase | EZ | 0.609448 | 0.236972 | a  |
| tRNA (uracil(54)-C(5))-methyltransferase    | AZ | -0.96437 | 0.167865 | b  |
| tRNA (uracil(54)-C(5))-methyltransferase    | BZ | -0.89515 | 0.134388 | b  |
| tRNA (uracil(54)-C(5))-methyltransferase    | CZ | 0.601912 | 0.089992 | a  |
| tRNA (uracil(54)-C(5))-methyltransferase    | DZ | 0.717486 | 0.102676 | a  |
| tRNA (uracil(54)-C(5))-methyltransferase    | EZ | 0.54012  | 0.173537 | a  |
| tRNA nucleotidyltransferase                 | AZ | -0.9114  | 0.177221 | b  |
| tRNA nucleotidyltransferase                 | BZ | -0.77529 | 0.119123 | b  |
| tRNA nucleotidyltransferase                 | CZ | 0.489543 | 0.101087 | a  |
| tRNA nucleotidyltransferase                 | DZ | 0.710699 | 0.092409 | a  |
| tRNA nucleotidyltransferase                 | EZ | 0.486447 | 0.234498 | a  |
| tRNA pseudouridine(38-40) synthase          | AZ | 0.880377 | 0.085356 | a  |
| tRNA pseudouridine(38-40) synthase          | BZ | 0.971534 | 0.024657 | a  |
| tRNA pseudouridine(38-40) synthase          | CZ | -0.36692 | 0.165544 | b  |
| tRNA pseudouridine(38-40) synthase          | DZ | -0.77025 | 0.124574 | b  |
| tRNA pseudouridine(38-40) synthase          | EZ | -0.71474 | 0.203217 | b  |
| tRNA-guanine(34) transglycosylase           | AZ | -0.93331 | 0.156848 | b  |
| tRNA-guanine(34) transglycosylase           | BZ | -0.91161 | 0.092082 | b  |
| tRNA-guanine(34) transglycosylase           | CZ | 0.522441 | 0.09764  | a  |
| tRNA-guanine(34) transglycosylase           | DZ | 0.865867 | 0.051099 | a  |
| tRNA-guanine(34) transglycosylase           | EZ | 0.456605 | 0.219346 | a  |
| Tropinone reductase I                       | AZ | -0.92494 | 0.146354 | b  |
| Tropinone reductase I                       | BZ | -0.90168 | 0.106962 | b  |
| Tropinone reductase I                       | CZ | 0.578397 | 0.101142 | a  |
| Tropinone reductase I                       | DZ | 0.751591 | 0.073557 | a  |
| Tropinone reductase I                       | EZ | 0.496631 | 0.225319 | a  |
| Tropinone reductase II                      | AZ | -1.02877 | 0.15774  | b  |
| Tropinone reductase II                      | BZ | -0.22402 | 0.205929 | ab |
| Tropinone reductase II                      | CZ | 0.315487 | 0.184408 | a  |
| Tropinone reductase II                      | DZ | 0.814878 | 0.11712  | a  |
| Tropinone reductase II                      | EZ | 0.12243  | 0.175021 | ab |
| Trypsin                                     | AZ | -0.88395 | 0.16718  | b  |
| Trypsin                                     | BZ | -0.92799 | 0.08825  | b  |
| Trypsin                                     | CZ | 0.571765 | 0.149068 | a  |
| Trypsin                                     | DZ | 0.470916 | 0.060853 | a  |
| Trypsin                                     | EZ | 0.769253 | 0.197967 | a  |
| Tryptophan--tRNA ligase                     | AZ | 0.836398 | 0.118646 | a  |
| Tryptophan--tRNA ligase                     | BZ | 0.950925 | 0.036297 | a  |
| Tryptophan--tRNA ligase                     | CZ | -0.29716 | 0.161371 | b  |
| Tryptophan--tRNA ligase                     | DZ | -0.89031 | 0.131278 | b  |
| Tryptophan--tRNA ligase                     | EZ | -0.59985 | 0.19774  | b  |
| Tubulin--tyrosine ligase                    | AZ | -0.97935 | 0.163142 | b  |
| Tubulin--tyrosine ligase                    | BZ | -0.78113 | 0.090227 | b  |

|                                                     |    |          |          |    |
|-----------------------------------------------------|----|----------|----------|----|
| Tubulin--tyrosine ligase                            | CZ | 0.456724 | 0.09938  | a  |
| Tubulin--tyrosine ligase                            | DZ | 0.938962 | 0.086716 | a  |
| Tubulin--tyrosine ligase                            | EZ | 0.364791 | 0.219585 | a  |
| Type I site-specific deoxyribonuclease              | AZ | -0.76153 | 0.137925 | b  |
| Type I site-specific deoxyribonuclease              | BZ | -0.8598  | 0.169786 | b  |
| Type I site-specific deoxyribonuclease              | CZ | 0.584179 | 0.140283 | a  |
| Type I site-specific deoxyribonuclease              | DZ | 0.279196 | 0.174326 | a  |
| Type I site-specific deoxyribonuclease              | EZ | 0.757954 | 0.162591 | a  |
| Tyrosine decarboxylase                              | AZ | -0.87359 | 0.162729 | b  |
| Tyrosine decarboxylase                              | BZ | -0.91699 | 0.094296 | b  |
| Tyrosine decarboxylase                              | CZ | 0.613292 | 0.103382 | a  |
| Tyrosine decarboxylase                              | DZ | 0.759466 | 0.08515  | a  |
| Tyrosine decarboxylase                              | EZ | 0.417813 | 0.223863 | a  |
| Tyrosine transaminase                               | AZ | 0.74654  | 0.086983 | ab |
| Tyrosine transaminase                               | BZ | 0.890337 | 0.030078 | a  |
| Tyrosine transaminase                               | CZ | -0.19819 | 0.185751 | bc |
| Tyrosine transaminase                               | DZ | -0.54985 | 0.130912 | c  |
| Tyrosine transaminase                               | EZ | -0.88884 | 0.236229 | c  |
| Tyrosine--tRNA ligase                               | AZ | 0.775952 | 0.100415 | a  |
| Tyrosine--tRNA ligase                               | BZ | 0.980717 | 0.015534 | a  |
| Tyrosine--tRNA ligase                               | CZ | -0.13891 | 0.113263 | b  |
| Tyrosine--tRNA ligase                               | DZ | -0.89315 | 0.158407 | b  |
| Tyrosine--tRNA ligase                               | EZ | -0.7246  | 0.215536 | b  |
| Ubiquitinyl hydrolase 1                             | AZ | -0.89597 | 0.087432 | b  |
| Ubiquitinyl hydrolase 1                             | BZ | -0.92198 | 0.0632   | b  |
| Ubiquitinyl hydrolase 1                             | CZ | 0.558067 | 0.18277  | a  |
| Ubiquitinyl hydrolase 1                             | DZ | 0.72429  | 0.133602 | a  |
| Ubiquitinyl hydrolase 1                             | EZ | 0.535592 | 0.19576  | a  |
| UDP-glucose 6-dehydrogenase                         | AZ | 0.847989 | 0.081435 | a  |
| UDP-glucose 6-dehydrogenase                         | BZ | 0.969791 | 0.041106 | a  |
| UDP-glucose 6-dehydrogenase                         | CZ | -0.56007 | 0.190107 | b  |
| UDP-glucose 6-dehydrogenase                         | DZ | -0.64121 | 0.150531 | b  |
| UDP-glucose 6-dehydrogenase                         | EZ | -0.6165  | 0.186157 | b  |
| UDP-glucose--hexose-1-phosphate uridylyltransferase | AZ | -0.92378 | 0.163429 | b  |
| UDP-glucose--hexose-1-phosphate uridylyltransferase | BZ | -0.85881 | 0.108954 | b  |
| UDP-glucose--hexose-1-phosphate uridylyltransferase | CZ | 0.56172  | 0.101788 | a  |
| UDP-glucose--hexose-1-phosphate uridylyltransferase | DZ | 0.732521 | 0.069869 | a  |
| UDP-glucose--hexose-1-phosphate uridylyltransferase | EZ | 0.488351 | 0.228257 | a  |
| UDP-glucuronate 4-epimerase                         | AZ | -0.89325 | 0.0923   | b  |
| UDP-glucuronate 4-epimerase                         | BZ | -1.1266  | 0.062867 | b  |
| UDP-glucuronate 4-epimerase                         | CZ | 0.751926 | 0.105013 | a  |
| UDP-glucuronate 4-epimerase                         | DZ | 0.639498 | 0.094012 | a  |
| UDP-glucuronate 4-epimerase                         | EZ | 0.628425 | 0.189323 | a  |
| UDP-glucuronate decarboxylase                       | AZ | -0.93344 | 0.143638 | b  |

|                                         |    |          |          |   |
|-----------------------------------------|----|----------|----------|---|
| UDP-glucuronate decarboxylase           | BZ | -0.94157 | 0.092397 | b |
| UDP-glucuronate decarboxylase           | CZ | 0.433413 | 0.15687  | a |
| UDP-glucuronate decarboxylase           | DZ | 0.916182 | 0.05031  | a |
| UDP-glucuronate decarboxylase           | EZ | 0.525413 | 0.175026 | a |
| UDP-N-acetylglucosamine diphosphorylase | AZ | 0.8557   | 0.081742 | a |
| UDP-N-acetylglucosamine diphosphorylase | BZ | 0.918939 | 0.029086 | a |
| UDP-N-acetylglucosamine diphosphorylase | CZ | -0.46179 | 0.207909 | b |
| UDP-N-acetylglucosamine diphosphorylase | DZ | -0.68075 | 0.125612 | b |
| UDP-N-acetylglucosamine diphosphorylase | EZ | -0.6321  | 0.202048 | b |
| UMP/CMP kinase                          | AZ | 0.835083 | 0.040204 | a |
| UMP/CMP kinase                          | BZ | 0.883621 | 0.010458 | a |
| UMP/CMP kinase                          | CZ | -0.14654 | 0.161629 | b |
| UMP/CMP kinase                          | DZ | -0.73186 | 0.183458 | b |
| UMP/CMP kinase                          | EZ | -0.8403  | 0.203534 | b |
| Unspecific monooxygenase                | AZ | -0.92722 | 0.149551 | b |
| Unspecific monooxygenase                | BZ | -0.91378 | 0.066139 | b |
| Unspecific monooxygenase                | CZ | 0.344665 | 0.131433 | a |
| Unspecific monooxygenase                | DZ | 0.947686 | 0.044262 | a |
| Unspecific monooxygenase                | EZ | 0.548647 | 0.208313 | a |
| Uracil phosphoribosyltransferase        | AZ | -0.86695 | 0.099366 | b |
| Uracil phosphoribosyltransferase        | BZ | -0.98809 | 0.036861 | b |
| Uracil phosphoribosyltransferase        | CZ | 0.377441 | 0.167029 | a |
| Uracil phosphoribosyltransferase        | DZ | 0.901755 | 0.108881 | a |
| Uracil phosphoribosyltransferase        | EZ | 0.57585  | 0.195591 | a |
| Urease                                  | AZ | 0.811517 | 0.119597 | a |
| Urease                                  | BZ | 0.839779 | 0.05726  | a |
| Urease                                  | CZ | 0.188843 | 0.075642 | a |
| Urease                                  | DZ | -1.07171 | 0.110885 | b |
| Urease                                  | EZ | -0.76843 | 0.217889 | b |
| Ureidoglycolate lyase                   | AZ | -0.90944 | 0.121381 | b |
| Ureidoglycolate lyase                   | BZ | -0.91925 | 0.166549 | b |
| Ureidoglycolate lyase                   | CZ | 0.670664 | 0.113371 | a |
| Ureidoglycolate lyase                   | DZ | 0.584315 | 0.092782 | a |
| Ureidoglycolate lyase                   | EZ | 0.573709 | 0.190903 | a |
| Uridine kinase                          | AZ | 0.820464 | 0.093983 | a |
| Uridine kinase                          | BZ | 0.974281 | 0.02145  | a |
| Uridine kinase                          | CZ | -0.41705 | 0.172497 | b |
| Uridine kinase                          | DZ | -0.65111 | 0.145889 | b |
| Uridine kinase                          | EZ | -0.72659 | 0.20557  | b |
| Uridine nucleosidase                    | AZ | -0.91298 | 0.129411 | b |
| Uridine nucleosidase                    | BZ | -0.92122 | 0.163767 | b |
| Uridine nucleosidase                    | CZ | 0.621711 | 0.1167   | a |
| Uridine nucleosidase                    | DZ | 0.678886 | 0.074589 | a |
| Uridine nucleosidase                    | EZ | 0.533611 | 0.191137 | a |



|                                              |    |          |          |   |
|----------------------------------------------|----|----------|----------|---|
| Uridine phosphorylase                        | AZ | 0.829347 | 0.056455 | a |
| Uridine phosphorylase                        | BZ | 0.891435 | 0.016657 | a |
| Uridine phosphorylase                        | CZ | -0.10454 | 0.146067 | b |
| Uridine phosphorylase                        | DZ | -0.68785 | 0.163947 | b |
| Uridine phosphorylase                        | EZ | -0.92838 | 0.216561 | b |
| Uroporphyrinogen decarboxylase               | AZ | 0.866975 | 0.103291 | a |
| Uroporphyrinogen decarboxylase               | BZ | 0.963014 | 0.033401 | a |
| Uroporphyrinogen decarboxylase               | CZ | -0.38104 | 0.172209 | b |
| Uroporphyrinogen decarboxylase               | DZ | -0.76706 | 0.109521 | b |
| Uroporphyrinogen decarboxylase               | EZ | -0.6819  | 0.206604 | b |
| Uroporphyrinogen-III C-methyltransferase     | AZ | 0.866659 | 0.102881 | a |
| Uroporphyrinogen-III C-methyltransferase     | BZ | 0.962763 | 0.033284 | a |
| Uroporphyrinogen-III C-methyltransferase     | CZ | -0.38295 | 0.172962 | b |
| Uroporphyrinogen-III C-methyltransferase     | DZ | -0.76987 | 0.110636 | b |
| Uroporphyrinogen-III C-methyltransferase     | EZ | -0.6766  | 0.205898 | b |
| Uroporphyrinogen-III synthase                | AZ | -0.85779 | 0.153122 | b |
| Uroporphyrinogen-III synthase                | BZ | -0.98338 | 0.115376 | b |
| Uroporphyrinogen-III synthase                | CZ | 0.570972 | 0.101287 | a |
| Uroporphyrinogen-III synthase                | DZ | 0.784279 | 0.060862 | a |
| Uroporphyrinogen-III synthase                | EZ | 0.485918 | 0.212781 | a |
| UTP--glucose-1-phosphate uridylyltransferase | AZ | 0.895487 | 0.082605 | a |
| UTP--glucose-1-phosphate uridylyltransferase | BZ | 0.980742 | 0.024111 | a |
| UTP--glucose-1-phosphate uridylyltransferase | CZ | -0.39229 | 0.166334 | b |
| UTP--glucose-1-phosphate uridylyltransferase | DZ | -0.7713  | 0.109061 | b |
| UTP--glucose-1-phosphate uridylyltransferase | EZ | -0.71263 | 0.204973 | b |
| Valine--pyruvate transaminase                | AZ | -0.95521 | 0.160654 | b |
| Valine--pyruvate transaminase                | BZ | -0.80353 | 0.10269  | b |
| Valine--pyruvate transaminase                | CZ | 0.464303 | 0.103315 | a |
| Valine--pyruvate transaminase                | DZ | 0.823043 | 0.065305 | a |
| Valine--pyruvate transaminase                | EZ | 0.471399 | 0.234611 | a |
| Valine--tRNA ligase                          | AZ | 0.868536 | 0.09196  | a |
| Valine--tRNA ligase                          | BZ | 0.970388 | 0.025544 | a |
| Valine--tRNA ligase                          | CZ | -0.37212 | 0.159382 | b |
| Valine--tRNA ligase                          | DZ | -0.85457 | 0.136848 | b |
| Valine--tRNA ligase                          | EZ | -0.61223 | 0.199451 | b |
| Vesicle-fusing ATPase                        | AZ | 0.876062 | 0.101512 | a |
| Vesicle-fusing ATPase                        | BZ | 0.94001  | 0.039625 | a |
| Vesicle-fusing ATPase                        | CZ | -0.34925 | 0.170521 | b |
| Vesicle-fusing ATPase                        | DZ | -0.75032 | 0.102407 | b |
| Vesicle-fusing ATPase                        | EZ | -0.71651 | 0.214683 | b |
| Xaa-Pro aminopeptidase                       | AZ | 0.858847 | 0.100336 | a |
| Xaa-Pro aminopeptidase                       | BZ | 0.93918  | 0.036538 | a |
| Xaa-Pro aminopeptidase                       | CZ | -0.23374 | 0.14456  | b |
| Xaa-Pro aminopeptidase                       | DZ | -0.82174 | 0.13256  | b |

|                                     |    |          |          |    |
|-------------------------------------|----|----------|----------|----|
| Xaa-Pro aminopeptidase              | EZ | -0.74255 | 0.212322 | b  |
| Xaa-Pro dipeptidase                 | AZ | -0.80961 | 0.10241  | b  |
| Xaa-Pro dipeptidase                 | BZ | -0.96061 | 0.027449 | b  |
| Xaa-Pro dipeptidase                 | CZ | 0.21074  | 0.094558 | a  |
| Xaa-Pro dipeptidase                 | DZ | 0.815378 | 0.177046 | a  |
| Xaa-Pro dipeptidase                 | EZ | 0.744093 | 0.215441 | a  |
| Xenobiotic-transporting ATPase      | AZ | -0.92242 | 0.116281 | b  |
| Xenobiotic-transporting ATPase      | BZ | -0.95303 | 0.151276 | b  |
| Xenobiotic-transporting ATPase      | CZ | 0.644053 | 0.114258 | a  |
| Xenobiotic-transporting ATPase      | DZ | 0.685134 | 0.076007 | a  |
| Xenobiotic-transporting ATPase      | EZ | 0.546267 | 0.1941   | a  |
| Xylan 1,4-beta-xylosidase           | AZ | -0.90228 | 0.093958 | b  |
| Xylan 1,4-beta-xylosidase           | BZ | -1.11411 | 0.067727 | b  |
| Xylan 1,4-beta-xylosidase           | CZ | 0.750669 | 0.102698 | a  |
| Xylan 1,4-beta-xylosidase           | DZ | 0.632909 | 0.091445 | a  |
| Xylan 1,4-beta-xylosidase           | EZ | 0.632814 | 0.191525 | a  |
| Xyloglucan:xyloglucosyl transferase | AZ | -0.94946 | 0.199276 | c  |
| Xyloglucan:xyloglucosyl transferase | BZ | -0.61602 | 0.088585 | bc |
| Xyloglucan:xyloglucosyl transferase | CZ | 0.79821  | 0.126691 | a  |
| Xyloglucan:xyloglucosyl transferase | DZ | 0.33424  | 0.207183 | ab |
| Xyloglucan:xyloglucosyl transferase | EZ | 0.433031 | 0.150332 | ab |
| Xylulokinase                        | AZ | 0.802738 | 0.081857 | a  |
| Xylulokinase                        | BZ | 0.857514 | 0.041326 | a  |
| Xylulokinase                        | CZ | -0.60288 | 0.182417 | b  |
| Xylulokinase                        | DZ | -0.32889 | 0.189908 | b  |
| Xylulokinase                        | EZ | -0.72847 | 0.207724 | b  |

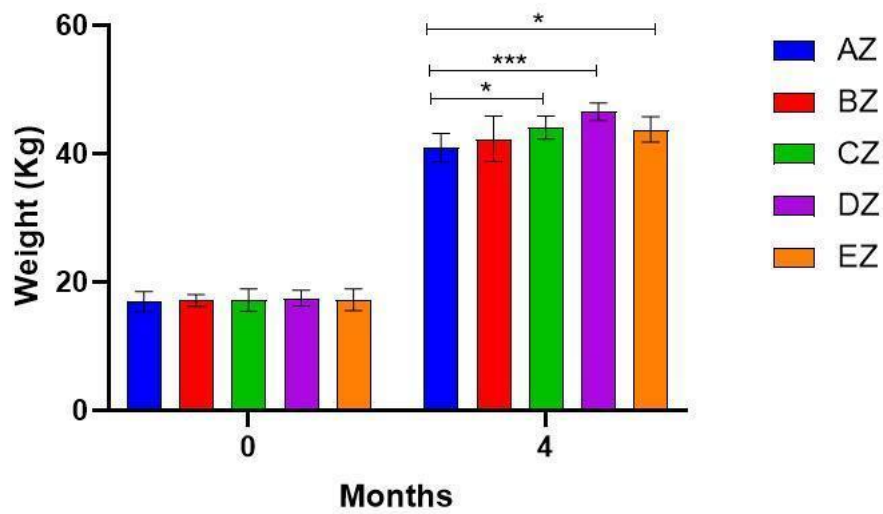

**Figure S1.** Body weights of the ST sheep in different groups. Significance is presented as \*  $p < 0.05$  and \*\*\*  $p < 0.001$ ; data are presented as the mean  $\pm$  SEM (n = 6).

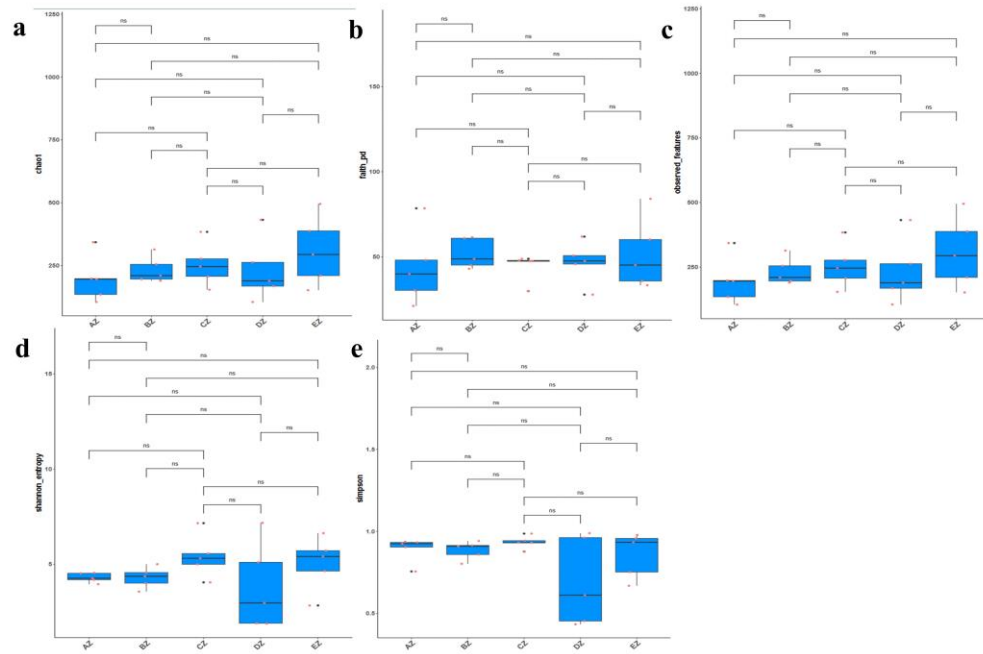

**Figure S2.** Comparing analyses of the Alpha diversity index in the ST sheep groups: (a) chao1; (b) faith\_pd; (c) observed\_features; (d) shannon\_entropy; (e) Simpson. ns: non-significant

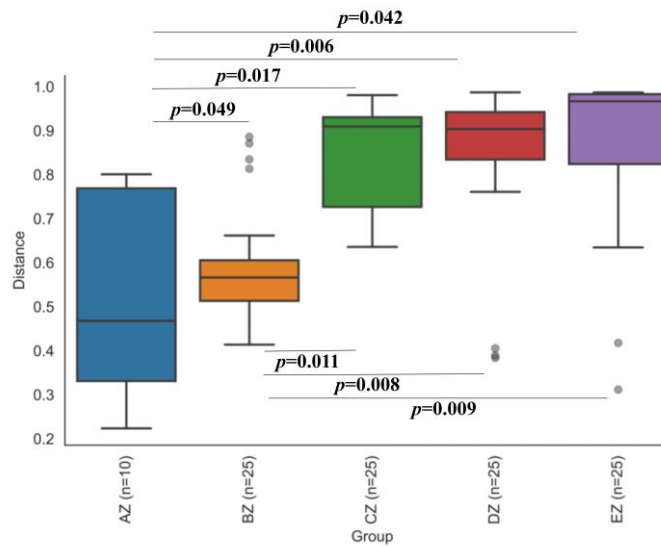

**Figure S3.** Pairwise ANOSIM analysis of Qiime2 in the five ST sheep groups.
